# Supplementary material for: Modular metabolite assembly in Caenorhabditis elegans depends on carboxylesterases and formation of lysosome-related organelles
Source: eLife. 2020 Oct 16;9:e61886. doi: 10.7554/eLife.61886 (PMC7641594; doi:10.7554/eLife.61886)
Supplement: Figure 1—figure supplement 2—source data 1. — Attached as a separate file. [file elife-61886-fig1-figsupp2-data1.xlsx]

## Sheet: Sheet1
Figure 1-figure supplement 2	glo-1
hydroxybenzoic acid	1.40673	1.66143	2.07981	0.681425	1.17317	0.753132
PABA-glutamate	0.260777	0.182212	0.217503	1.05328	0.17982	0.096897
indole-3-carboxylic acid	1.587	0.73425	1.97097	0.50461	0.462213	0.197357
