# Supplementary material for: Modular metabolite assembly in Caenorhabditis elegans depends on carboxylesterases and formation of lysosome-related organelles
Source: eLife. 2020 Oct 16;9:e61886. doi: 10.7554/eLife.61886 (PMC7641594; doi:10.7554/eLife.61886)
Supplement: Figure 1—source data 1. — Attached as a separate file. [file elife-61886-fig1-data1.xlsx]

## Sheet: Figure 1e
Figure 1e
Total features (endometabolome)	10 fold up (endometabolome)	10 fold down (endometabolome)	Total features (exometabolome)	10 fold up (exometabolome)
41898	4319	6009	60548	3848
