# Supplementary material for: Modular metabolite assembly in Caenorhabditis elegans depends on carboxylesterases and formation of lysosome-related organelles
Source: eLife. 2020 Oct 16;9:e61886. doi: 10.7554/eLife.61886 (PMC7641594; doi:10.7554/eLife.61886)
Supplement: Figure 2—figure supplement 5—source data 1. — Attached as a separate file. [file elife-61886-fig2-figsupp5-data1.xlsx]

## Sheet: Figure 2-figure supplement 5a
Figure 2-figure supplement 5a	glo-1
ascr#1	0.614205	0.618616	0.877661	2.79317	1.76462	2.49649
ascr#3	0.596422	0.557476	0.62882	1.94183	1.08668	1.7657
ascr#9	0.398303	0.350718	0.501473	0.957612	0.658413	0.685618
ascr#10	0.672916	0.57	0.690395	1.90194	1.30684	1.60917
ascr#18	0.893195	0.78989	0.698921	1.99227	1.26828	1.50426
icas#10	0	0	0	0.002275	0	0
icas#3	0.00102	0	0	0	0	0.000327
icas#9	0.000138	0.000282	0.001447	0.000574	0.000485	0.000387
osas#10	0	0	0	0	0	0
osas#9	0	0.002844	0.012478	4.47e-05	0	7.52e-05
ascr#81	0	0.014988	0.014176	0.000223	0.000598	0
mbas#3	0.00471194	0.00396179	0.00669423	0.00152947	0	0.0027965
nuclas#31/32				0	0.029259	0.032461
nuclas#33/34	0	0	0	0	0	0
nuclas#71				0	0	0
uglas#1				0	0	0

## Sheet: Figure 2-figure supplement 5b
Figure 2-figure supplement 5b	glo-1
glas#1	15.3	16.1	59.4
glas#3	50.1	67.7	118	7.9622	53.2665	5.49877
glas#10				53.8565	81.6985	45.8624
anglas#1	10.7618	9.30872	14.6013	15.307	17.4258	14.543
anglas#2	36.9205	34.9252	47.6585	41.0102	25.0471	38.4849
anglas#3	1.40945	1.3901	2.62129	4.33081	3.99923	4.14781
iglas#1	1.20411	1.24548	2.39342	3.51242	3.29634	3.26951
ascr#4	0.050098	0.011028	0.195675	0.001659	0.00269	0.022123
ascr#69	0.928926	0.006319	0.121823	0.017065	0.009504	0.006721

## Sheet: Figure 2-figure supplement 5c
Figure 2-figure supplement 5c	glo-1
ascr#10	0.687158	0.621803	0.619903
ascr#10-phos	4.98511	4.65819	4.30552
ascr#12	0.459035	0.407136	0.347893
ascr#12-phos	2.78163	3.06757	3.34661
ascr#18	0.908565	0.859708	0.624155
ascr#18-phos	3.80219	4.11632	3.22682
ascr#1	0.632104	0.680071	0.794523
ascr#1-phos	13.9783	15.8855	19.9828
ascr#3	0.611812	0.611836	0.569105
ascr#3-phos	2.51565	2.94677	2.90155
ascr#9	0.407576	0.239246	0.453881
ascr#9-phos	1.92522	2.37365	2.45343

## Sheet: Figure 2-figure supplement 5d
Figure 2-figure supplement 5d	glo-4
ascr#3	1.36123	0.685078
ascr#9	0.849794	0.378206
ascr#10	2.20008	0.768192
icas#10	0.079122	0.065835
icas#9	0.02009	0.008867
osas#10	0.002979	0.001116
osas#9	0.002119	0.002828
hbas#3	0.006479	0.003485
mbas#3	0.001966	0.003911
ascr#81	0.000977	0.001088
uglas#11	0.006474	0.001573
uglas#71	0	0

## Sheet: Figure 2-figure supplement 5e
Figure 2-figure supplement 5e	glo-4
glas#1	11.6287	2.84367
glas#10	3.7556	3.51171
anglas#1	23.7586	13.049
anglas#3	2.44081	1.45632
iglas#1	2.25036	1.28416

## Sheet: Figure 2-figure supplement 5f
Figure 2-figure supplement 5f	glo-4
ascr#10	2.19961	0.767524
ascr#10-phos	33.0046	16.4764
ascr#12	0.729183	0.370607
ascr#12-phos	5.43931	2.94297
ascr#18	3.23253	1.59794
ascr#18-phos	10.5561	6.08546
ascr#1	1.63448	0.91312
ascr#1-phos	36.4428	21.605
ascr#3	1.3279	0.676816
ascr#3-phos	6.8392	4.65105
ascr#9	0.424947	0.270937
ascr#9-phos	2.34047	1.30247
