# Supplementary material for: Modular metabolite assembly in Caenorhabditis elegans depends on carboxylesterases and formation of lysosome-related organelles
Source: eLife. 2020 Oct 16;9:e61886. doi: 10.7554/eLife.61886 (PMC7641594; doi:10.7554/eLife.61886)
Supplement: Figure 2—figure supplement 7—source data 1. — Attached as a separate file. [file elife-61886-fig2-figsupp7-data1.xlsx]

## Sheet: Figure 2-figure supplement 7
Figure 2-figure supplement 7	Endo-metabolome						Exo-metabolome
iglu#1	129594500	117959600	149204600	440584600	220719100	284831500	44405920	37956620	77060890	83413750
iglu#2	1132000000	1076000000	871261600	3454991000	2698000000	4700737000	1289669	1059199	5627650	5383490
iglu#3	139809	106723	195960	800917	408094	409094	49197	29220.2	236410	152383
iglu#4	406976500	380183400	378006000	1069249000	1038000000	1644038000	326257	316785	1939554	1535320
