# Supplementary material for: Modular metabolite assembly in Caenorhabditis elegans depends on carboxylesterases and formation of lysosome-related organelles
Source: eLife. 2020 Oct 16;9:e61886. doi: 10.7554/eLife.61886 (PMC7641594; doi:10.7554/eLife.61886)
Supplement: Figure 2—figure supplement 8—source data 1. — Attached as a separate file. [file elife-61886-fig2-figsupp8-data1.xlsx]

## Sheet: Figure 2-figure supplement 8a
Figure 2-figure supplement 8a	L1			L2			L3			L4			Adult
iglu#2	627000000	770000000	527000000	966000000	867000000	555000000	1360000000	1760000000	1690000000	1430000000	1530000000	1550000000	1520000000	1450000000	1400000000

## Sheet: Figure 2-figure supplement 8b
Figure 2-figure supplement 8b	L1			L2			L3			L4			Adult
iglu#4	17300000	11300000	11100000	20400000	19100000	15900000	40100000	76300000	61300000	100000000	75200000	98900000	88500000	97500000	107000000

## Sheet: Figure 2-figure supplement 8c
Figure 2-figure supplement 8c	L1			L2			L3			L4			Adult
angl#4	478000	392000	355000	227000	154000	238000	1720000	1390000	2020000	2930000	1320000	2640000	3720000	7570000	8340000

## Sheet: Figure 2-figure supplement 8d
Figure 2-figure supplement 8d	L1			L2			L3			L4			Adult
tyglu#6	219099	181998	102690	202712	307451	686091	1133663	2508261	1521707	960003	607058	550841	166320	139934	210389
