# Supplementary material for: Modular metabolite assembly in Caenorhabditis elegans depends on carboxylesterases and formation of lysosome-related organelles
Source: eLife. 2020 Oct 16;9:e61886. doi: 10.7554/eLife.61886 (PMC7641594; doi:10.7554/eLife.61886)
Supplement: Figure 2—figure supplement 9—source data 1. — Attached as a separate file. [file elife-61886-fig2-figsupp9-data1.xlsx]

## Sheet: Sheet1
Figure 2-figure supplement 9	glo-1
nicotinic acid	0.609427	0.981288	0.983662	1.04607	1.08315	1.35378
pyrrolic acid	0.154544	0.0993887	2.18921	1.9781	2.94007	1.43527
urocanic acid	0.436534	0.587192	0.793176	1.02095	1.38348	1.45693
serotonin	1.7429	2.13536	0.956186	0.501724	0.633477	0.931054
N-acetyl-serotonin	0.120363	0.160702	0.0671312	0.212306	0.176441	0.283962
octopamine	0.29797	0.390356	2.08396	0.599523	0.469261	1.00811
tyramine	1.62312	0.725574	0.841822	1.26518	1.20109	1.72199
anthranilic acid	0.0758448	0.0435282	0.0468845	0.0457017	0.0494672	0.0688114
indole	0.412045	0.657085	0.305624	1.05122	1.05736	1.22218
iglu#1	1.05051	0.731389	0.823513	1.24434	0.968608	1.39133
angl#1	16.3674	17.0866	14.5618	0.825207	2.17266	0.792637
