# Supplementary material for: Modular metabolite assembly in Caenorhabditis elegans depends on carboxylesterases and formation of lysosome-related organelles
Source: eLife. 2020 Oct 16;9:e61886. doi: 10.7554/eLife.61886 (PMC7641594; doi:10.7554/eLife.61886)
Supplement: Figure 3—figure supplement 1—source data 1. — Attached as a separate file. [file elife-61886-fig3-figsupp1-data1.xlsx]

## Sheet: Sheet1
Figure 3-figure supplement 1	ascr#8			ascr#81			ascr#82
cest-1.1	1.00314	0.971032	1.2625	1.1065	1.20324	0.926929	0.712886	0.716589	0.405949
cest-2.2	2.92e-06	2.92e-06	2.92e-06	2.19e-08	2.19e-08	2.19e-08	1.27e-07	1.27e-07	1.27e-07
cest-4	0.674513	0.54646	1.37639	1.03588	0.93852	0.979171	1.37833	1.16868	1.14359
N2	1.23283	0.842631	1.03773	1.01581	0.933864	0.974835	0.783111	1.21689	1
