# Supplementary material for: Modular metabolite assembly in Caenorhabditis elegans depends on carboxylesterases and formation of lysosome-related organelles
Source: eLife. 2020 Oct 16;9:e61886. doi: 10.7554/eLife.61886 (PMC7641594; doi:10.7554/eLife.61886)
Supplement: Figure 3—figure supplement 4—source data 1. — Attached as a separate file. [file elife-61886-fig3-figsupp4-data1.xlsx]

## Sheet: Sheet1
Figure 3-figure supplement 4	cest-4
iglu#3	0.0142425	0.0236158	0.0160245	0.0134306
iglu#4	0.0769927	0.063339	0.0931057	0.0653773
iglu#5	0.723247	0.882336	0.626843	0.786514
iglu#6	0.518587	0.61097	0.521807	0.452001
iglu#7	0.210634	0.317959	0.215429	0.295574
iglu#8	3.43961	2.53935	2.48679	3.01809
iglu#9	0.931043	1.48254	2.00517	1.42667
iglu#10	6.08288	0.878171	7.46802	2.01102
