# Supplementary material for: Modular metabolite assembly in Caenorhabditis elegans depends on carboxylesterases and formation of lysosome-related organelles
Source: eLife. 2020 Oct 16;9:e61886. doi: 10.7554/eLife.61886 (PMC7641594; doi:10.7554/eLife.61886)
Supplement: Figure 3—source data 1. — Attached as a separate file. [file elife-61886-fig3-data1.xlsx]

## Sheet: Figure 3c
Figure 3c	cest-2.2				cest-2.2 revert
PABA-glutamate	0.30796	0.157913	0.198492	0.477873	0.405064	0.702612	0.89454	0.622205
ascr#8	0	0	0	0	0.58878	1.28555	0.227811	0.208633
ascr#81	0	0	0	0	1.57607	1.99779	1.39156	1.4914
ascr#82	0	0	0	0	0.709558	0.862218	0.929227	0.889667

## Sheet: Figure 3e
Figure 3e	cest-1.1					cest-1.1 revert
uglas#11	0	0	0	0	0	0.969852	0.366347	1.458	0.731501
uglas#1	0	0	0	0	0	0.471741	0.671024	0.683252	0.547591
gluric#1	1.14206	0.652139	1.58323	0.94835	0.404242	0.882017	0.292311	1.21785	0.882853

## Sheet: Figure 3f
Figure 3f	cest-1.1
uglas#1	0	0	0	0
uglas#11	0	0	0	0
uglas#14	0.301	0.622	0.766	0.463
uglas#15	4.41	2.65	2.83	2.6

## Sheet: Figure 3g
Figure 3g	cest-1.1(dp683)(S213A)
uglas#1	0	0	0
uglas#11	0	0	0
gluric#1	1.70912	0.237842	0.0885986

## Sheet: Figure 3i
Figure 3i	cest-4				cest-4 revert
iglu#1	0.873325	1.07228	0.95231	0.811049	1.29864	1.1731	1.08426	1.3529
iglu#2	1.76815	2.22272	2.14785	2.07138	1.15562	1.11662	0.647214	1.27446
iglu#4	0.022287	0.034788	0.021137	0.035907	1.18235	1.0215	0.598949	1.25439
anthranilic acid	0.957776	0.96716	1.13734	1.06474	0.962994	0.908739	1.20634	1.03236

## Sheet: Figure 3j
Figure 3j	cest-4
iglu#4	0.0769927	0.063339	0.0931057	0.0653773
iglu#6	0.518587	0.61097	0.521807	0.452001
iglu#8	3.43961	2.53935	2.48679	3.01809
