# Supplementary material for: Modular metabolite assembly in Caenorhabditis elegans depends on carboxylesterases and formation of lysosome-related organelles
Source: eLife. 2020 Oct 16;9:e61886. doi: 10.7554/eLife.61886 (PMC7641594; doi:10.7554/eLife.61886)
Supplement: Figure 4—source data 1. — Attached as a separate file. [file elife-61886-fig4-data1.xlsx]

## Sheet: Figure  4a
Figure 4a	CEST-2.2-mCherry
ascr#7	0.978544	0.744669	1.27679
ascr#8	0.433214	1.21635	1.35044
ascr#81	0.868392	0.539269	1.59234
ascr#82	0.958422	0.460224	1.58135
