# Supplementary material for: Modular metabolite assembly in Caenorhabditis elegans depends on carboxylesterases and formation of lysosome-related organelles
Source: eLife. 2020 Oct 16;9:e61886. doi: 10.7554/eLife.61886 (PMC7641594; doi:10.7554/eLife.61886)
Supplement: Figure 5—source data 1. — Attached as a separate file. [file elife-61886-fig5-data1.xlsx]

## Sheet: Figure 5a
Figure 5a	CBR-glo-1-A			CBR-glo-1-B
ascr#1	1.34455	1.17928	1.31568	1.27622	1.6992	1.12101
ascr#10	0.721	0.844	0.861	1.02	1.56	0.914
ascr#18	0.813	0.91	1.04	1.41	1.52	1.11
ascr#2	1.16	0.652	0.346	0.452	0.797	0.359
ascr#3	0.505	0.514	0.655	0.682	0.957	0.724
ascr#6	0.945	0.252	0.188	0.12	0.714	0.171
ascr#7	1.07	1.1	0.844	0.948	1.23	0.931
icas#2	0.00139	0	0.00247	0.00103	0.00158	0.00128
icas#6	0.010559	0.057195	0.01057	0.01345	0.0134	0.001645

## Sheet: Figure 5b
Figure 5b	CBR-glo-1-A			CBR-glo-1-B
iglu#1	0.973	1	1.11	1.02	1.05	1.06
iglu#2	20.4	20.2	35.6	23.5	28.9	21.2
iglu#3	0	0.173	0.301	0.121	0.27	0
iglu#4	0	0.0561	0	0	0.0368	0
tyglu#4	0.0166	0	0.0263	0	0	0
tyglu#6	0	0	0	0	0	0
tyglu#8	0	0	0	0	0	0
angl#1	36.7	0.456	8.42	6.31	2.56	5.6
angl#3	0.02	0	0.004	0.06	0.02	0
angl#4	0	0	7.66388e-05	0	0	0
