# Supplementary material for: Modular metabolite assembly in Caenorhabditis elegans depends on carboxylesterases and formation of lysosome-related organelles
Source: eLife journal article supplement (doi:10.7554/elife.61886), 2020-10-16
Supplement: supp [file elife-61886-supp-v1.zip]

|           |     |                                                                                              |
|-----------|-----|----------------------------------------------------------------------------------------------|
| hAChE     | 1   | MRPPQCLL-----HTPS-----LASPLLLLLLWLLGGGVGAEG--REDAELLVTVRGGRLRGIRL----KTPGGP-VSA              |
| Ppa-UAR-1 | 1   | MKRRDRNDHIQMSLPKCFSLPTCPYHWLYASISTENMRLLVLSVSL-FFITASYSTSDYYFPVISTGYGSIRGYAF---TAHDGTE-AQI   |
| CEST-1.1  | 1   | MLKPATV-----L-----L-LIQ-----MYVCKRVQLSSGTIEGKILNISYSPLGNQSATV                                |
| CEST-2.2  | 1   | MFFRFFI-----L-----WAILQ-----NVRSTKVKLSTGTIEGRLLTASYSPLGNQTGIV                                |
| CEST-4    | 1   | MLLLPGL-----MNNLLLFLS---FLLLF---SITKSAIVSTSLGQIDGDQI-----GS-FHL                              |
|           |     |                                                                                              |
| hAChE     | 63  | FLGIPFAEPPMGPRRFLPPEPKQPWSGVVDATTFQSVCYQYVDTLYPGFEGTEMWNPNRELSIEDCLYLNWVTPYPRP-T-SPTPVLVWIIY |
| Ppa-UAR-1 | 86  | FKKIPFASAPIGDLRWKPKPHRPWNGTLDGTFFGPACTQRTNKYDG-----PVTGFSEDCLHVNVTSERCRESNSTCPVAFIIH         |
| CEST-1.1  | 46  | FLGIPFVEPPIGDLRYRKPRPPKSWEGVLVTNEYKSACMSNATKTYKNK-----FGGPISEDCLYLNVLVTNEYCLEN-KNCSVMMIVH    |
| CEST-2.2  | 47  | FFGVPYVEPPVGNLRFKPRPPKPWDGVLEAKEYKAACMSDQKKTYKNG-----VGGPVSEDCLYANVFTNQYCLEH-KNCSVMLTIH      |
| CEST-4    | 47  | FKHIPLAKPPIGKLRFAQPEPEKWTGVRNAKAYGPACISNSSVSTS-----PQKWIDEDCLHINIFTSDKCLKS-KDCAVVTFYFH       |
|           |     |                                                                                              |
| hAChE     | 151 | GGGFYSGASS-L--DVYDGRFLVQAERTVLVSMNYRVGAFGFLALPGSREAPGNVGLLDQRLALQWVQENVAAFGGDPTSVTLFGESAGA   |
| Ppa-UAR-1 | 167 | GGAGLYESTMKFPDEKLVRFVSQ--GIVVVTTAYRLSAFGAMDLDENALPANLGLHDIVAALNFTTRNEIGHFGGSKKITLLGQSEGG     |
| CEST-1.1  | 128 | GGGYLTESASTFNPEILINNFVGQGRNIVVVTFNRYRLGLFSFGQFNGDR-GDKNFGLYDMIESVNWVRREIENFGGNKNRITLAGHSAGA  |
| CEST-2.2  | 129 | GGRFVIESASAYDPEIIINNFVGQGRNIVVVTFNRYRLGLFGLGMLNGDN-QDTNFGLYDILEVVRWTRKEIKNFGGDKDRITMQGHSAGA  |
| CEST-4    | 127 | GGGLMYDSAVMFNDTYLLGTFTVNQ--DVIIAIPAFRLGIFSHFVVEDQSIAPTNLALYDILLGVFEFVKNEIHNFGGNNQKNTIMGHSYGG |
|           |     |                                                                                              |
| hAChE     | 238 | ASVGMHLLSPP-----SRGLFHRAVLQSGAPNGPWATVGMGEARRRATQLAHLVGCPPGGTGGND-----T-ELVACLRTRPAQVLVNH    |
| Ppa-UAR-1 | 255 | HYALMIAFSPGISKPGEKRLIDGIIIVMSGNGGL---EFREKAVERSHSVAKQLNCTGTA-----R-EIVECMRLHDTESIVAA         |
| CEST-1.1  | 218 | SMIVAFTSSPL-----TKGLVHQIIMSAPMTN---MSKKS NFKGMTVMAQMVGC LSEEIGFNKLSEEQVE-NTYSCLRKKS AQQILDA  |
| CEST-2.2  | 218 | VFTAAFSTSP L-----SKGLIHQIIMSASMSN---LSKKS NVKELTVVARIVGCLPDEHGF PKLSNVEVE-KAYTCLRSKSAQQILDA  |
| CEST-4    | 215 | SIVNILTFSSKIN--HDLSLFQQSICMSSGHDF---ETLEIQIQKTNRFAKHAGACTVPSIIIEKKMTTRQSDLYRMKCLQNKD ALELLRV |
|           |     |                                                                                              |
| hAChE     | 316 | EW H-----VLPQESVFRFSFVPVVDGDFLSDTPEALINAGDFHGLQVLVGVVKDEGSYFLVYGAPGFSKD NESLISRAEFLAGVRVGVPQ |
| Ppa-UAR-1 | 329 | SYKVNGPHILSQKAPFGI----TMSGELFPITNEKEL-REDPNPIRLMIGTTIEEIGGGVAGVD-----                        |
| CEST-1.1  | 297 | QLW-----LLQNSTYFL--GAPPIDEHFLTDPENLYASKSIYPINTLIGTTTLEVEESSYIIDPAFADKKVELLEN-----            |
| CEST-2.2  | 298 | QLY-----MLRNTTYII--GQGHIDGIYQVDYDPDNLATNSIYPINTMIGTTTAE LMDSPYIYDPKNTGKKEILLQN-----          |
| CEST-4    | 299 | QRL-----LE-DEGYPTY-GYLVQREPLIQEIPYQEF-MKSPKKIPMLTGCTRYEMDHSPAP-----                          |
|           |     |                                                                                              |
| hAChE     | 411 | VSDLAAEAVVLH-YTDWLHPEDPAR-L----RE-ALS-DVV-----G-D-HNVVCPVAQLAGRLAAQGARVYAYVFEHRASTLSWPLW--   |
| Ppa-UAR-1 | 388 | -----KINRILGIENGEECY---DKYLN DVES-GAFNPGYIEAS-QEMIMTAHIYAKYVAQIGGEAYLYEYDYP-----             |
| CEST-1.1  | 367 | ---L---CDHIG-YVLYEEPETFSKKCKQYMNGNSS-MNL-----SNE-MEFYTPAIDFADSHTSNGTKVFLYSYDYRGAGPAYDRYLE    |
| CEST-2.2  | 368 | ---L---CEHIG-YELYKEPEEFSQKCRNFYKNGEDA-KSL-----GDD-MEFYYGAIQLANVHSSKDTNVFVYSFDYKEAGNAYKKYDK   |
| CEST-4    | 353 | -----KPIGQALGFENPEEVYMKFRKDWDDVEYEFGNH----SDETQAIMVQVRVRVNNLLSKNVPAYLYEYTP-----              |
|           |     |                                                                                              |
| hAChE     | 474 | -MGVPHGYEIEFIFGIPLDPSRNYTAAE-KIFAQRLMRYWANFARTGDPNEPRDPKAPQWPPYTAGAQQYVS LDLRPL-E----VRRGLR  |
| Ppa-UAR-1 | 452 | -VHGHTDDAYHVLGIHE---YEMDENE-RWLSRAYPRYFSNFIKGERLAK-----DWSKVTPLLMNYYSVNRSRTDGVFPHTKYGYK      |
| CEST-1.1  | 443 | VRSPHSEDLIYVFGTHR---GIFAPKD-YIIEKIYSGMFADFVNFNENPLPSGD---QKWNQYTKENREHFLINF DKN-FITPGMRDNY   |
| CEST-2.2  | 444 | SLSPKHGEDFAYAFGTNR---GNFSTKD-YVIEYIYSGMFADFVNFGDPSPLED---QEW AQYTP EKREYFLIDF DKN-FTMPGMKDHY |
| CEST-4    | 419 | -KHARHTDDL FYLMGVHR---FEKDENE-IELGKVYETIFMNF AKFGDPKE-----GFELANAENESYEVYWDGETGERPQMKT KFE   |
|           |     |                                                                                              |
| hAChE     | 567 | AQACAFWN RFLPK-----LLSA---T-----DTLDEAERQWKAEFHRWSSYMVHWKN-----                              |
| Ppa-UAR-1 | 530 | NNLVKYYD-ELVK-YDQ-----VLSAAKMQAAN-----API-E---                                               |
| CEST-1.1  | 525 | TEAYEFWSTVGKKSFKKEWSPSLDTFTCALVISPLVSHMKQTTTAFDKTFEQT ELLYKEEVNFLKREKLERTQELKMETKRRDKALRIQN  |
| CEST-2.2  | 526 | PKALEFWSTCGSKSFKEHFSPSVDIFIIGNLLNPIMSHLNHNETGPDKTFEQFDKLYNEREEFLKLLKAVRKLEI-----QKKMWRGRS    |
| CEST-4    | 497 | EKIINYWLKDMVE-YDK-----HITELKNQKIS-----I-----RKPVVRF--                                        |
|           |     |                                                                                              |
| hAChE     | 601 | -----QFDHYSKQ-----DRCSDL-----                                                                |
| Ppa-UAR-1 | 560 | -----YK-SLNFDAGFQGFLSLSI--FD-----AIIF--VC-----VVLG-VLSLLCCLCNCFTSL-C-CCCCRGGY--SSI-          |
| CEST-1.1  | 615 | RKNGLANK---EITEGDEEDES KLD--IL-----LIIS--AG-----TLFGGILYV-----TLPNVIL-QKRARDGY--EL--         |
| CEST-2.2  | 610 | SKDLM-LKELVDLEKINEEEQETGAN--FL-----LIIF--GG-----TLLGGILYV-----SISHFCL-HHRSRDGY--QL--         |
| CEST-4    | 532 | -----Y-----EESKYYHQYSYMTISIL-----LIF--T-----IFLTGYLFG-----RCCCV-GNQDRNLY--IQLD               |
|           |     |                                                                                              |
| hAChE     | -   | -----                                                                                        |
| Ppa-UAR-1 | -   | -----                                                                                        |
| CEST-1.1  | 672 | ----LS-----                                                                                  |
| CEST-2.2  | 669 | ----LK-----                                                                                  |
| CEST-4    | 580 | GSNIPTGHIVKNF                                                                                |

\* =Catalytic triad (in AChE)

^ =Disulfide bond (in AChE)
