# Supplementary material for: Modular metabolite assembly in Caenorhabditis elegans depends on carboxylesterases and formation of lysosome-related organelles
Source: eLife journal article supplement (doi:10.7554/elife.61886), 2020-10-16
Supplement: supp [file elife-61886-supp-v1.zip]

## NMR Spectra Appendix

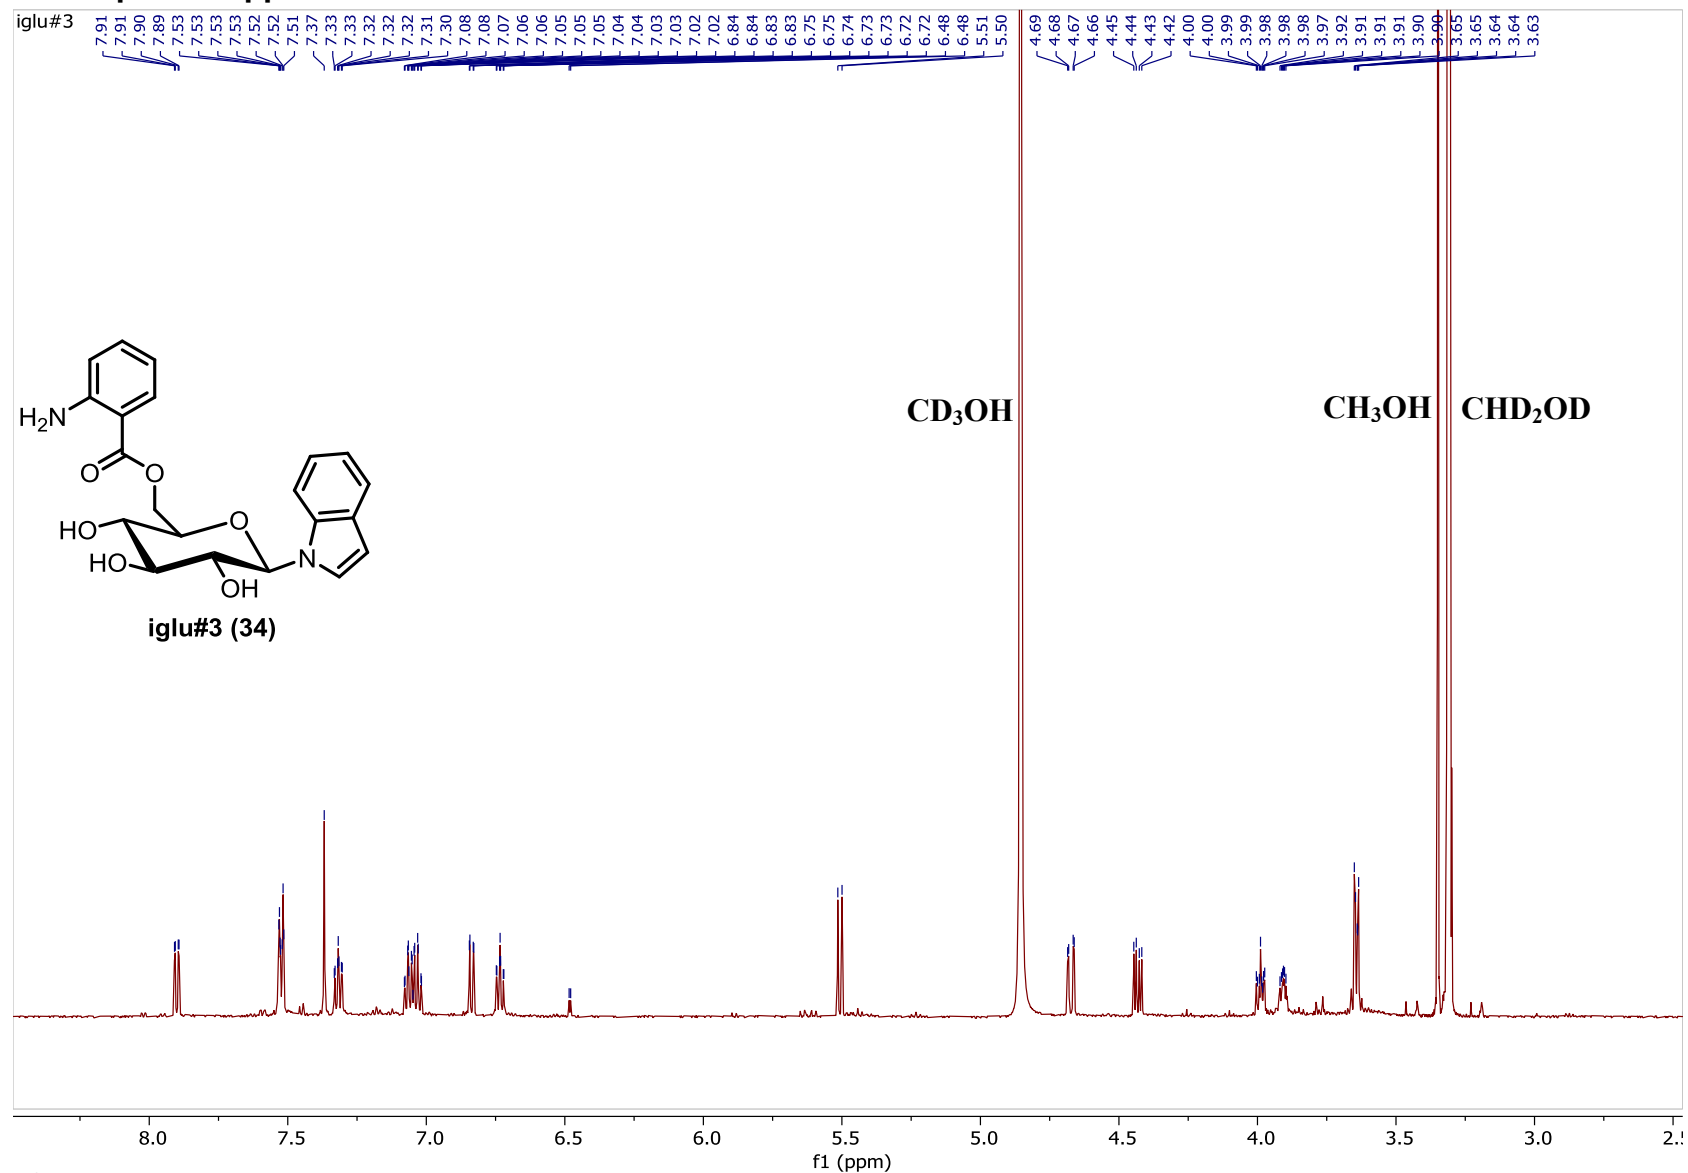

<sup>1</sup>H NMR spectrum (600 MHz) of iglu#3 (**34**) in methanol-*d*<sub>4</sub>.

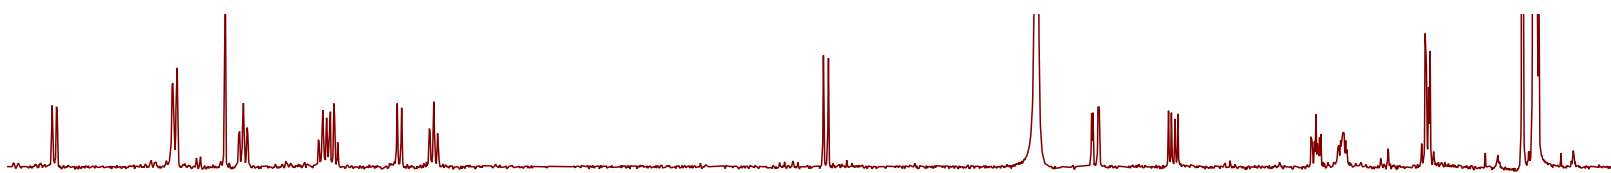

iglu#3

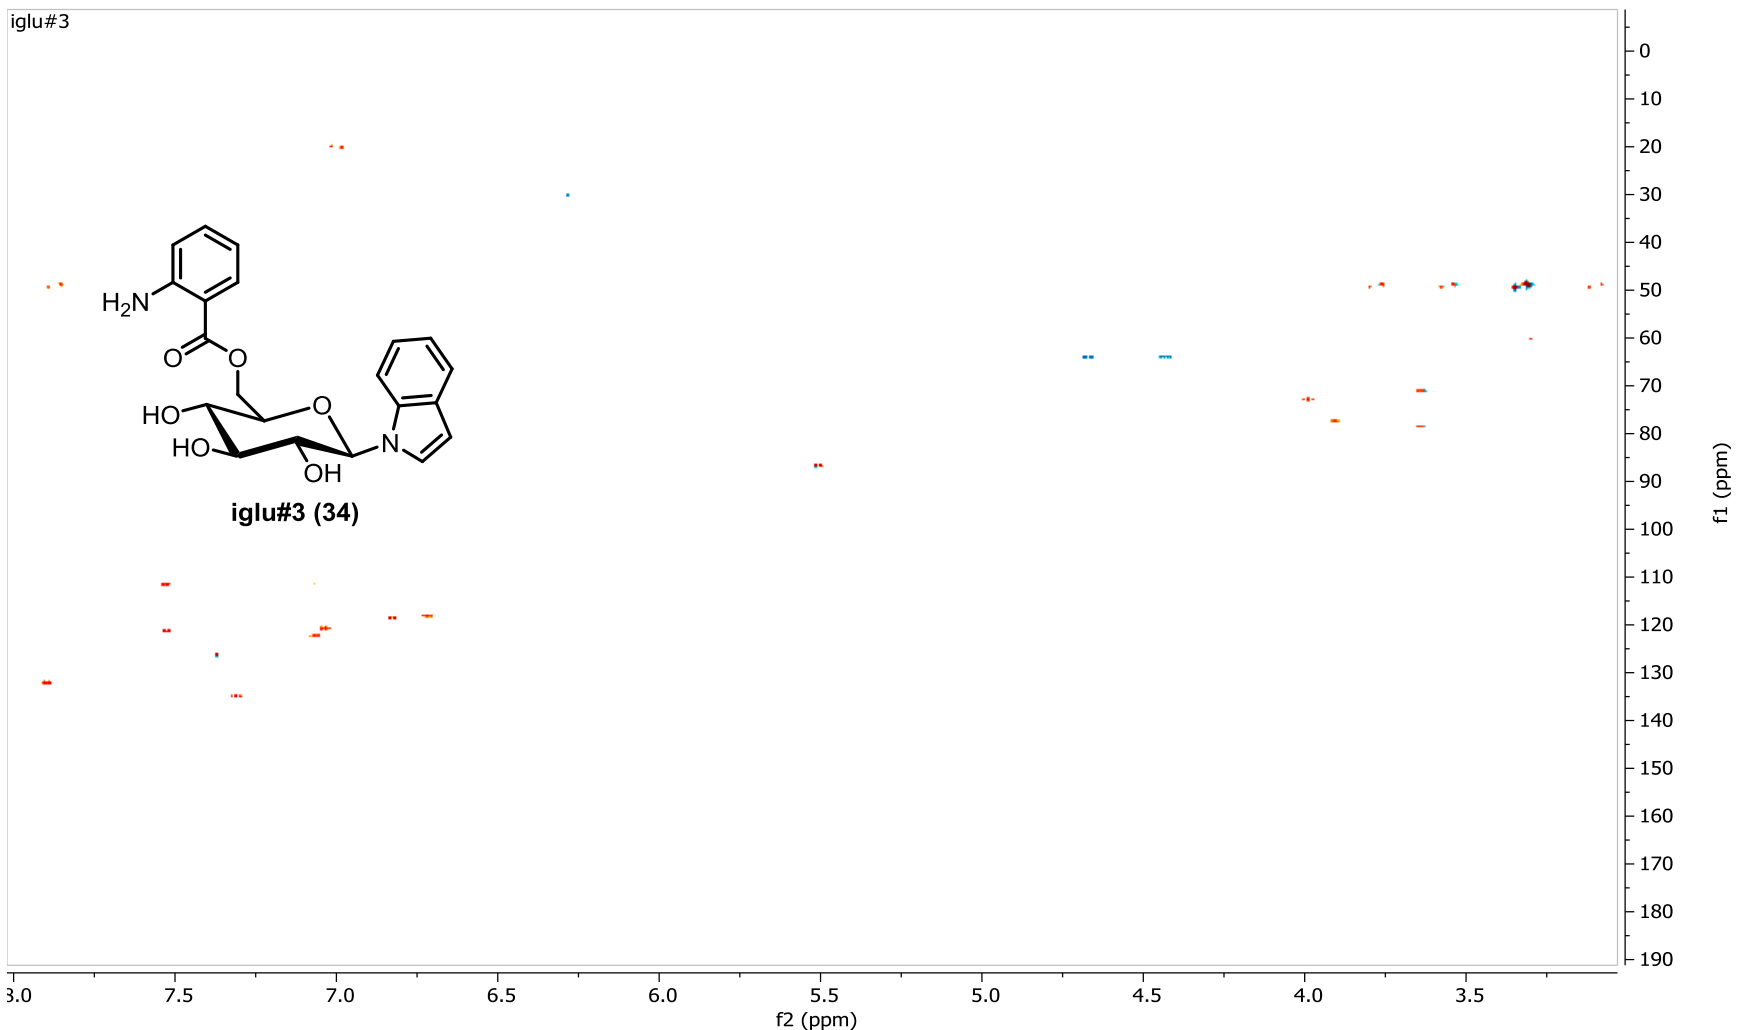

HSQC spectrum (600 MHz) of iglu#3 (**34**) in methanol- $d_4$ .

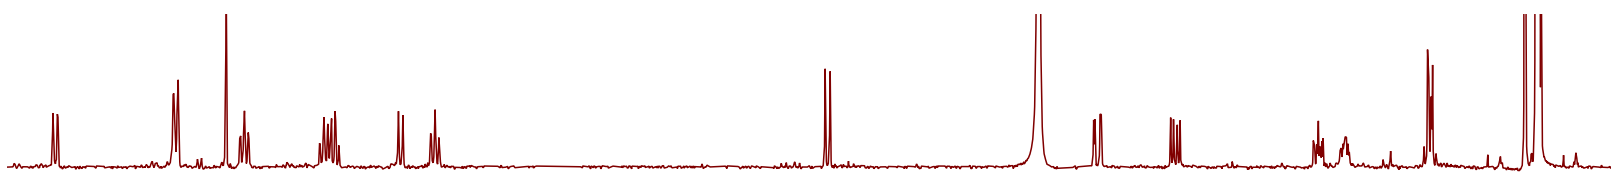

iglu#3

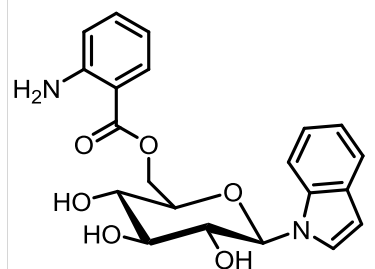

**iglu#3 (34)**

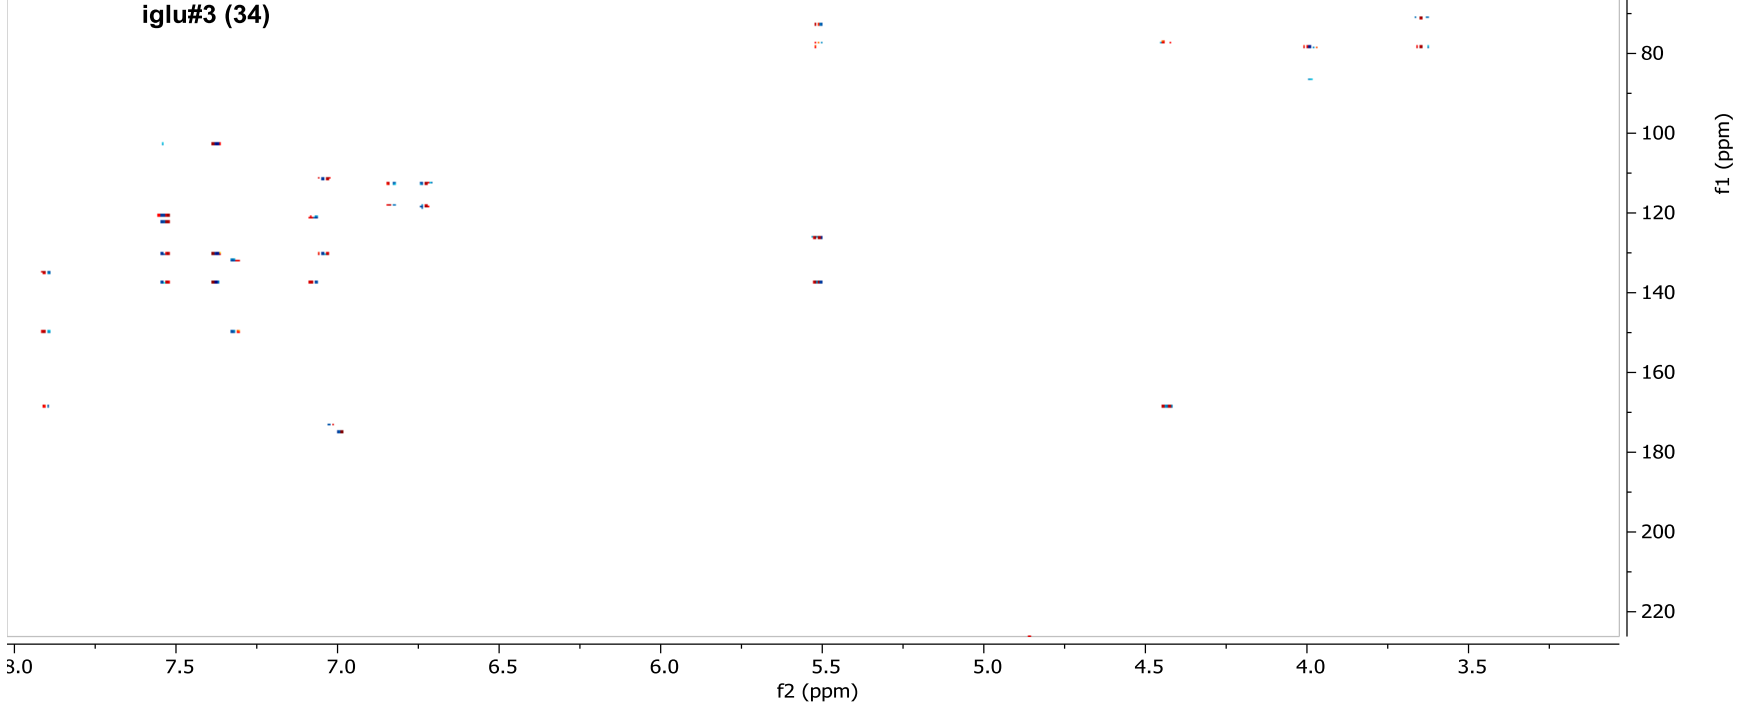

HMBC spectrum (600 MHz) of iglu#3 (**34**) in methanol-*d*<sub>4</sub>.

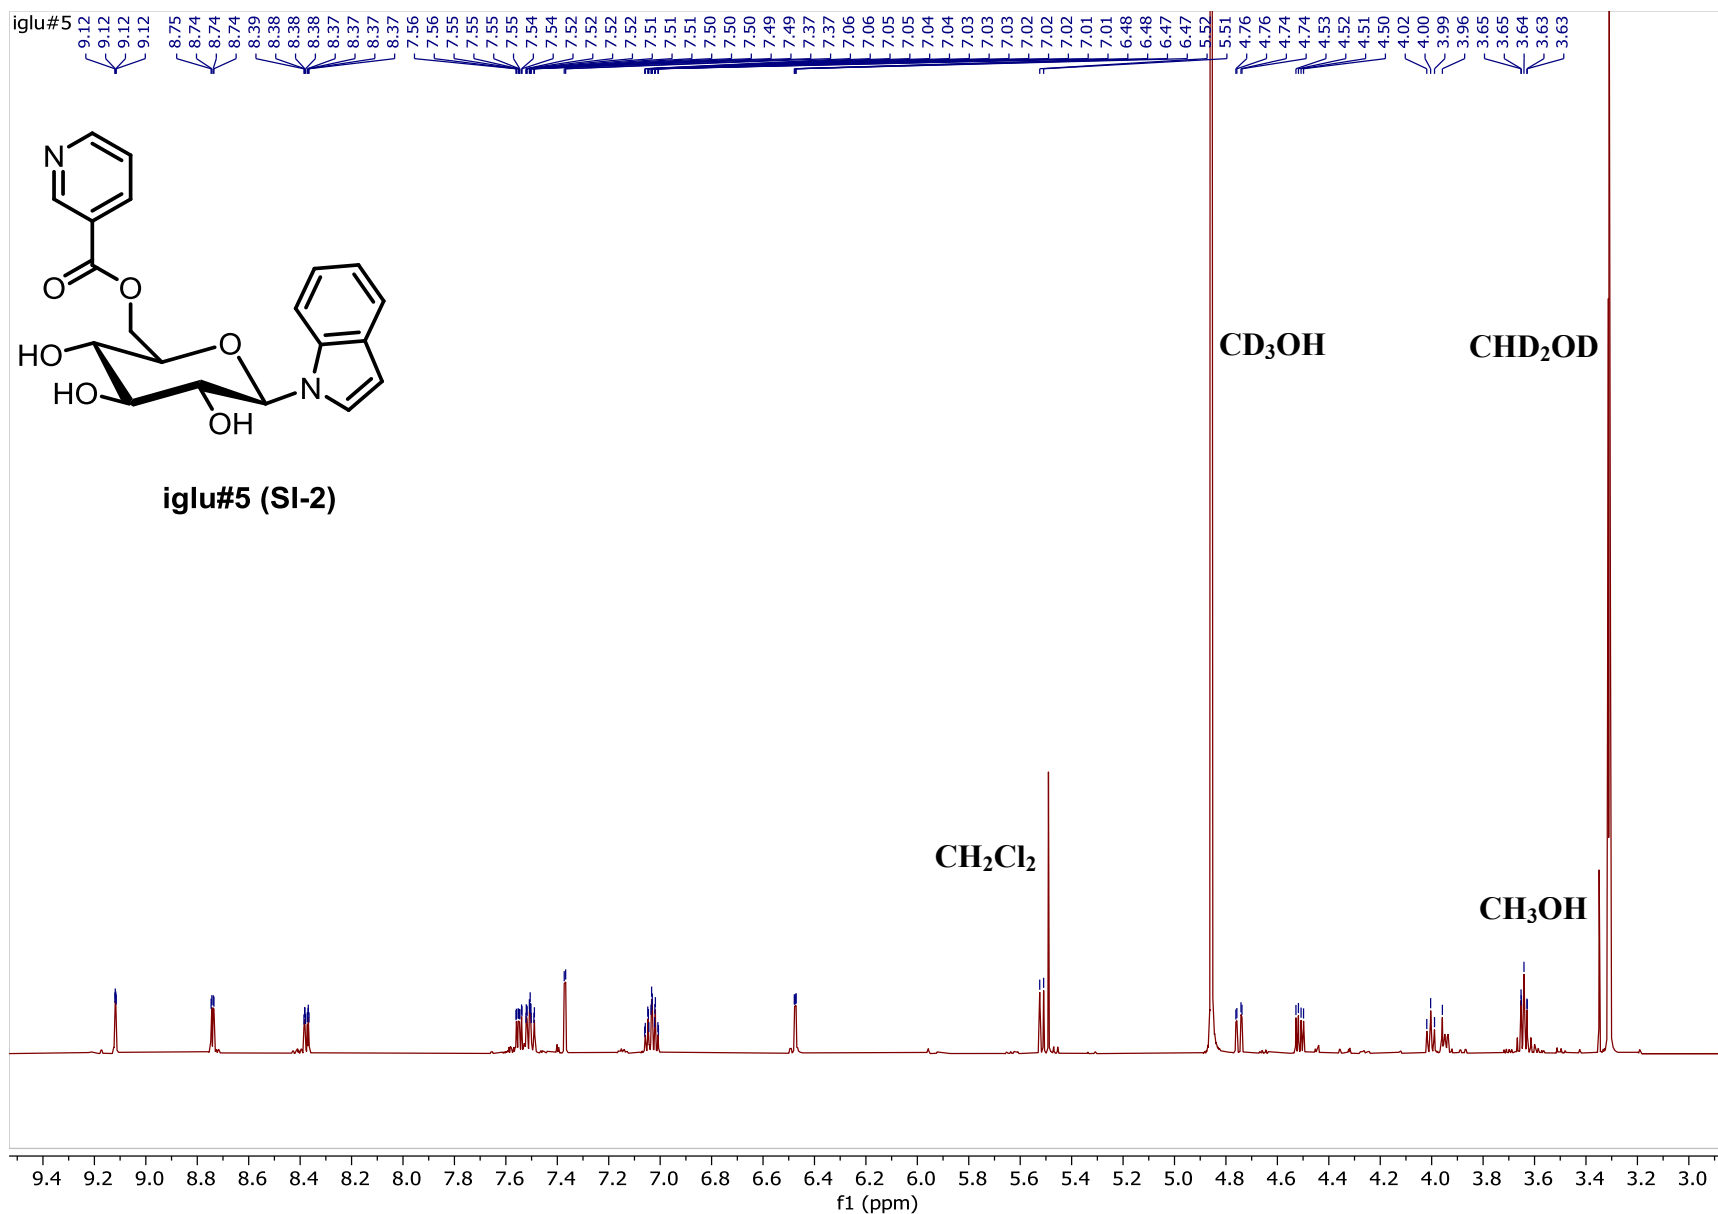

<sup>1</sup>H NMR spectrum (600 MHz) of iglu#5 (SI-2) in methanol-*d*<sub>4</sub>.

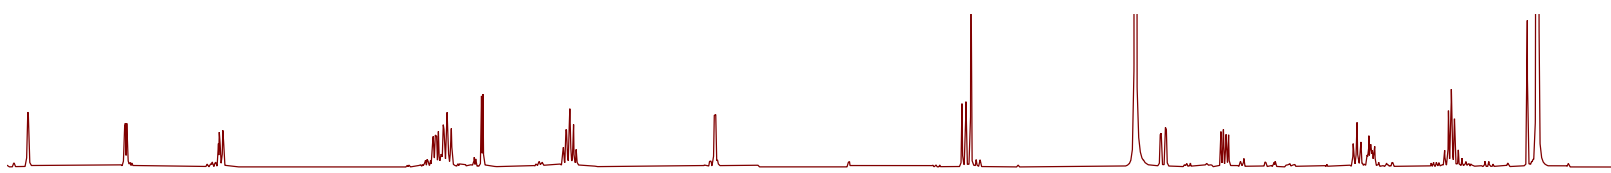

iglu#5

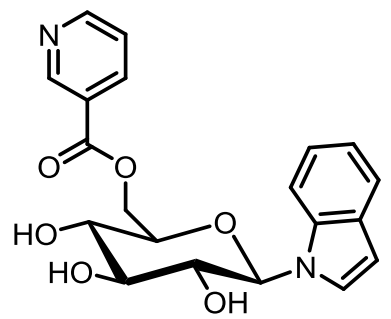

iglu#5 (SI-2)

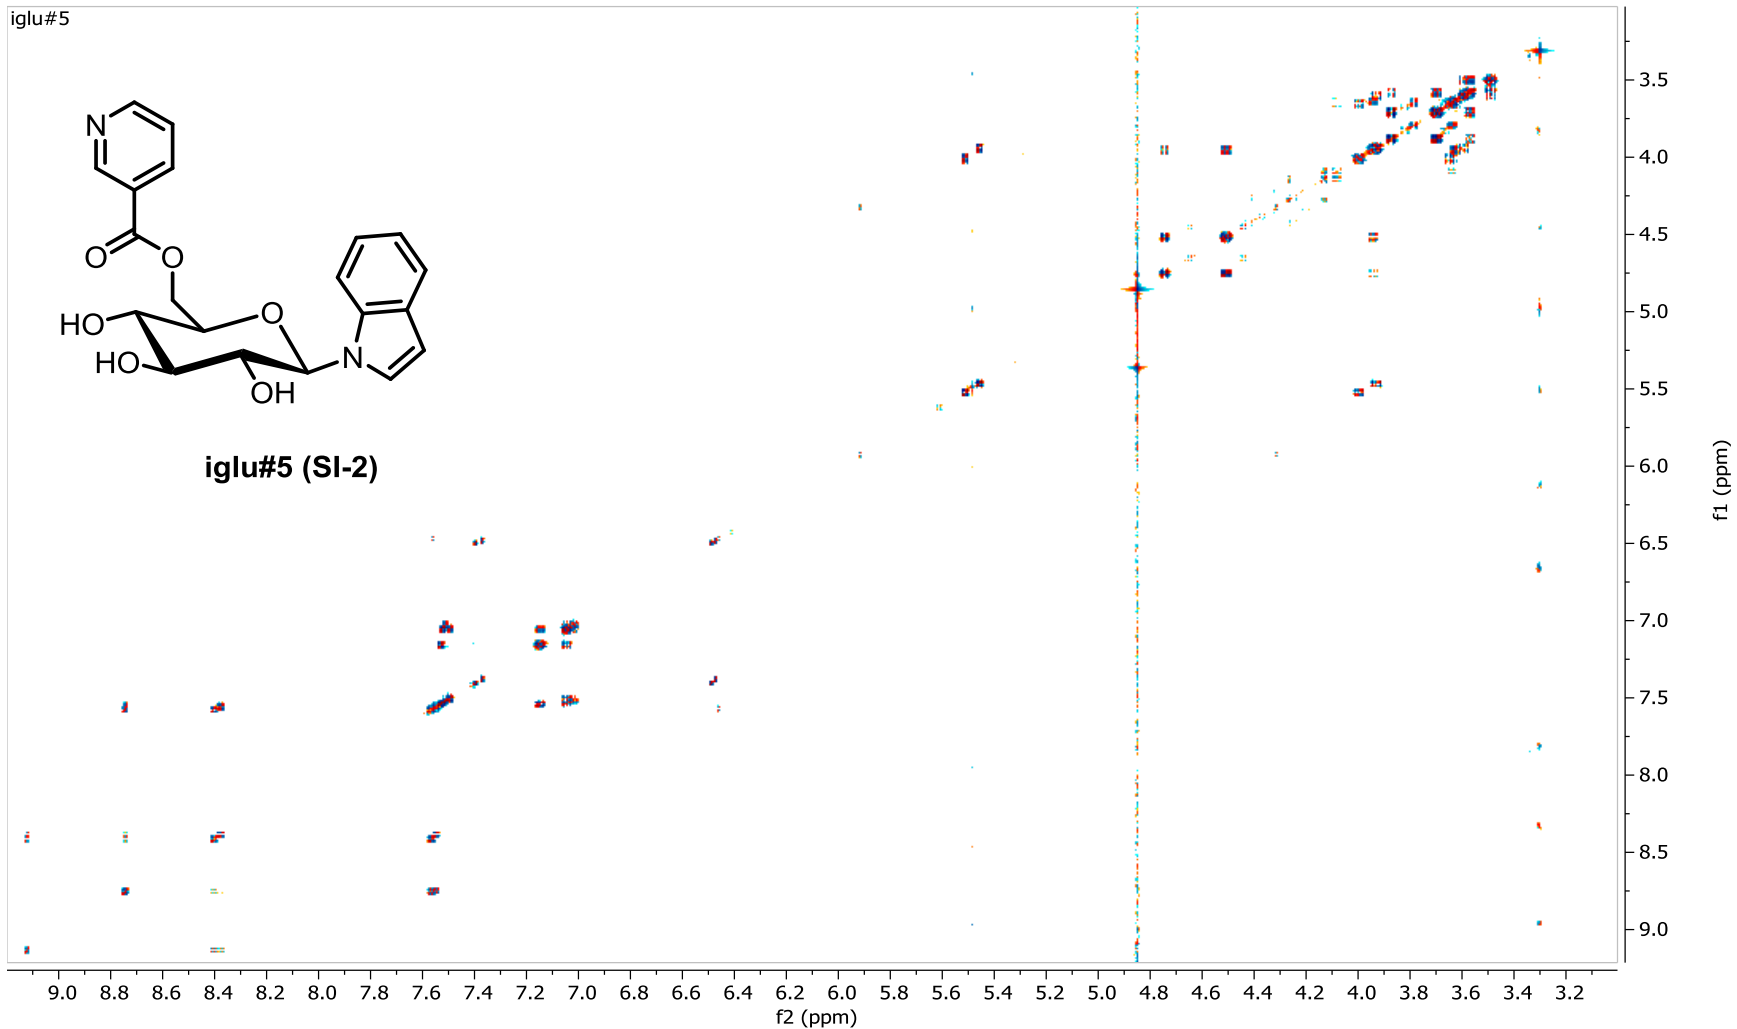

dqfCOSY spectrum (600 MHz) of iglu#5 (SI-2) in methanol- $d_4$ .

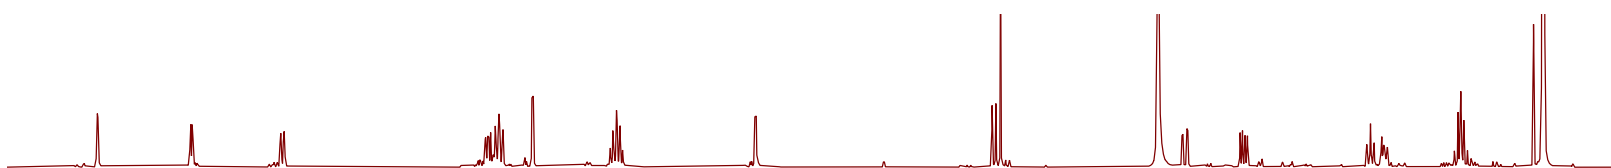

iglu#5

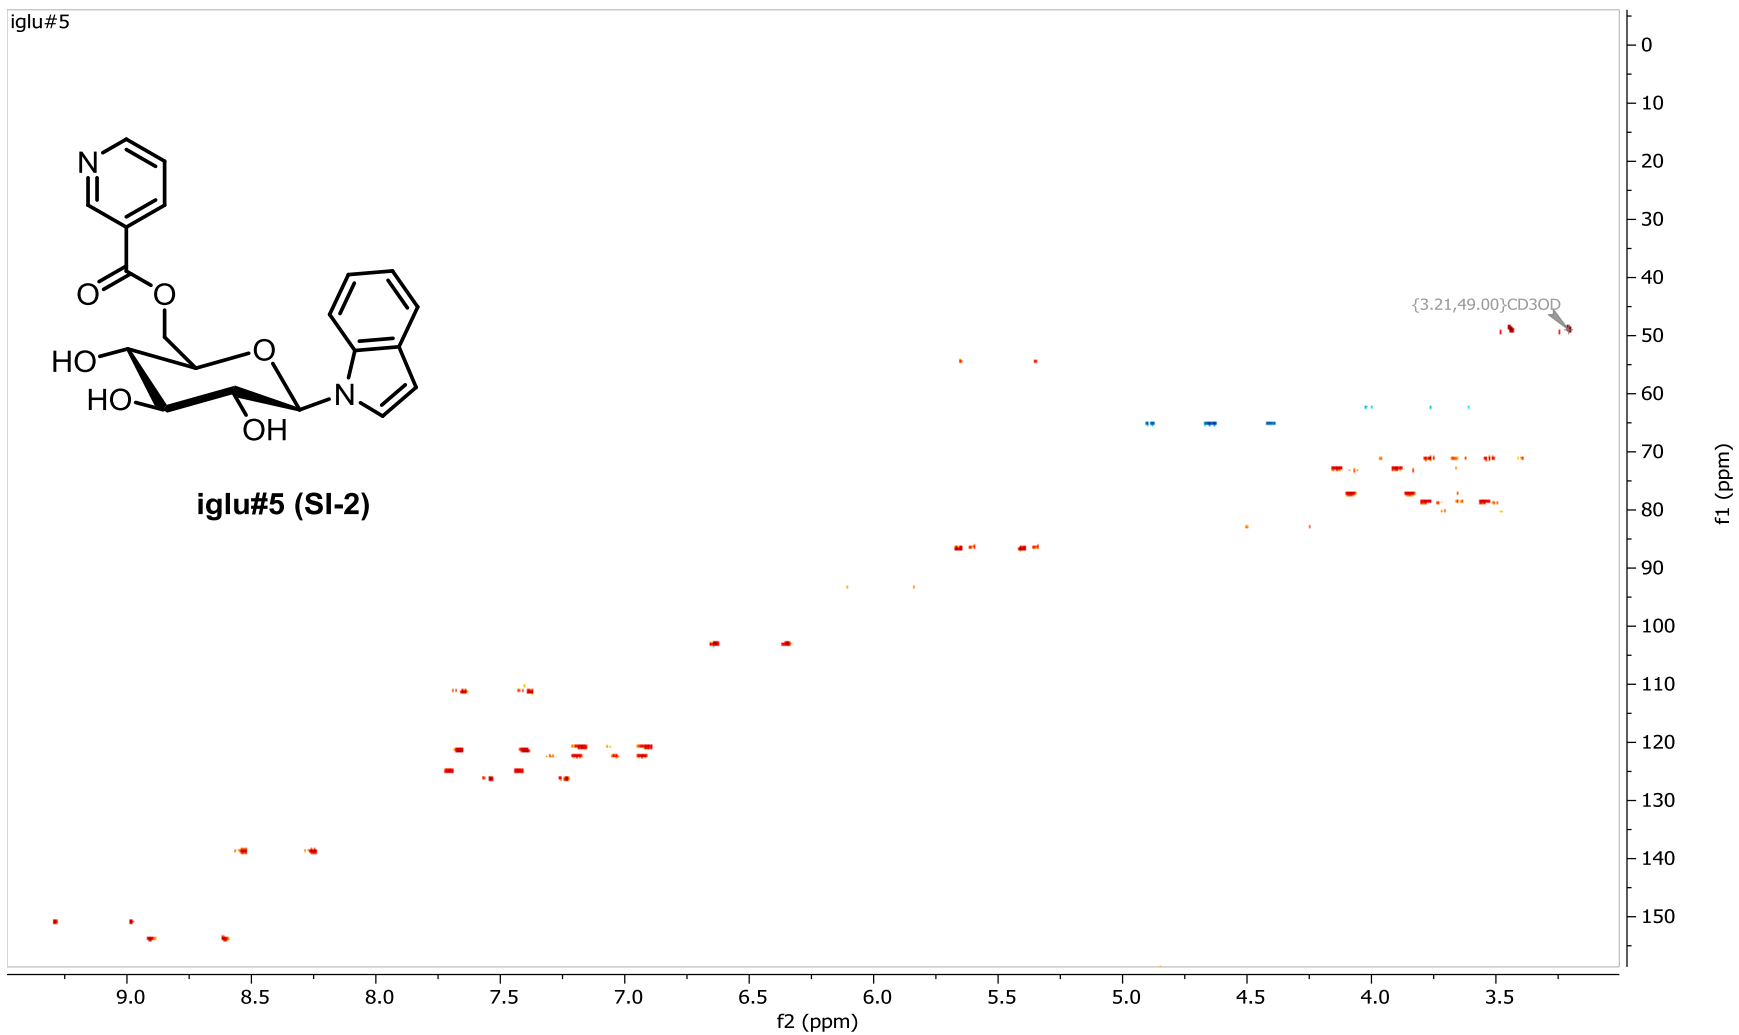

HSQC spectrum (600 MHz) of iglu#5 (SI-2) in methanol- $d_4$ .

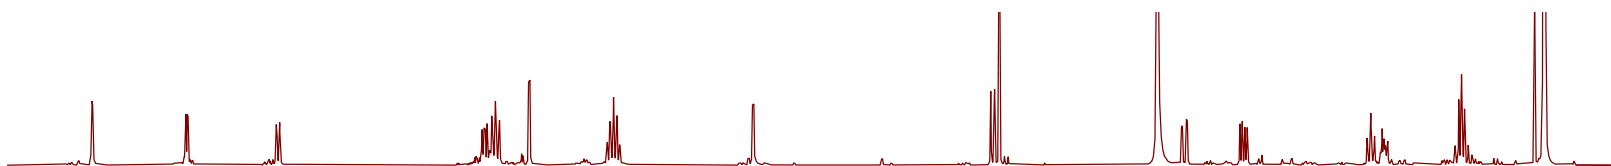

iglu#5

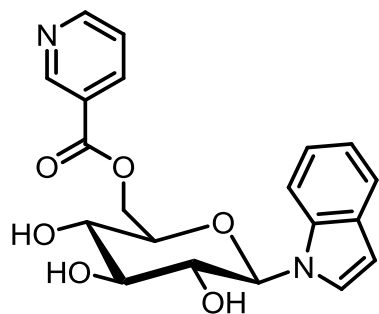

**iglu#5 (SI-2)**

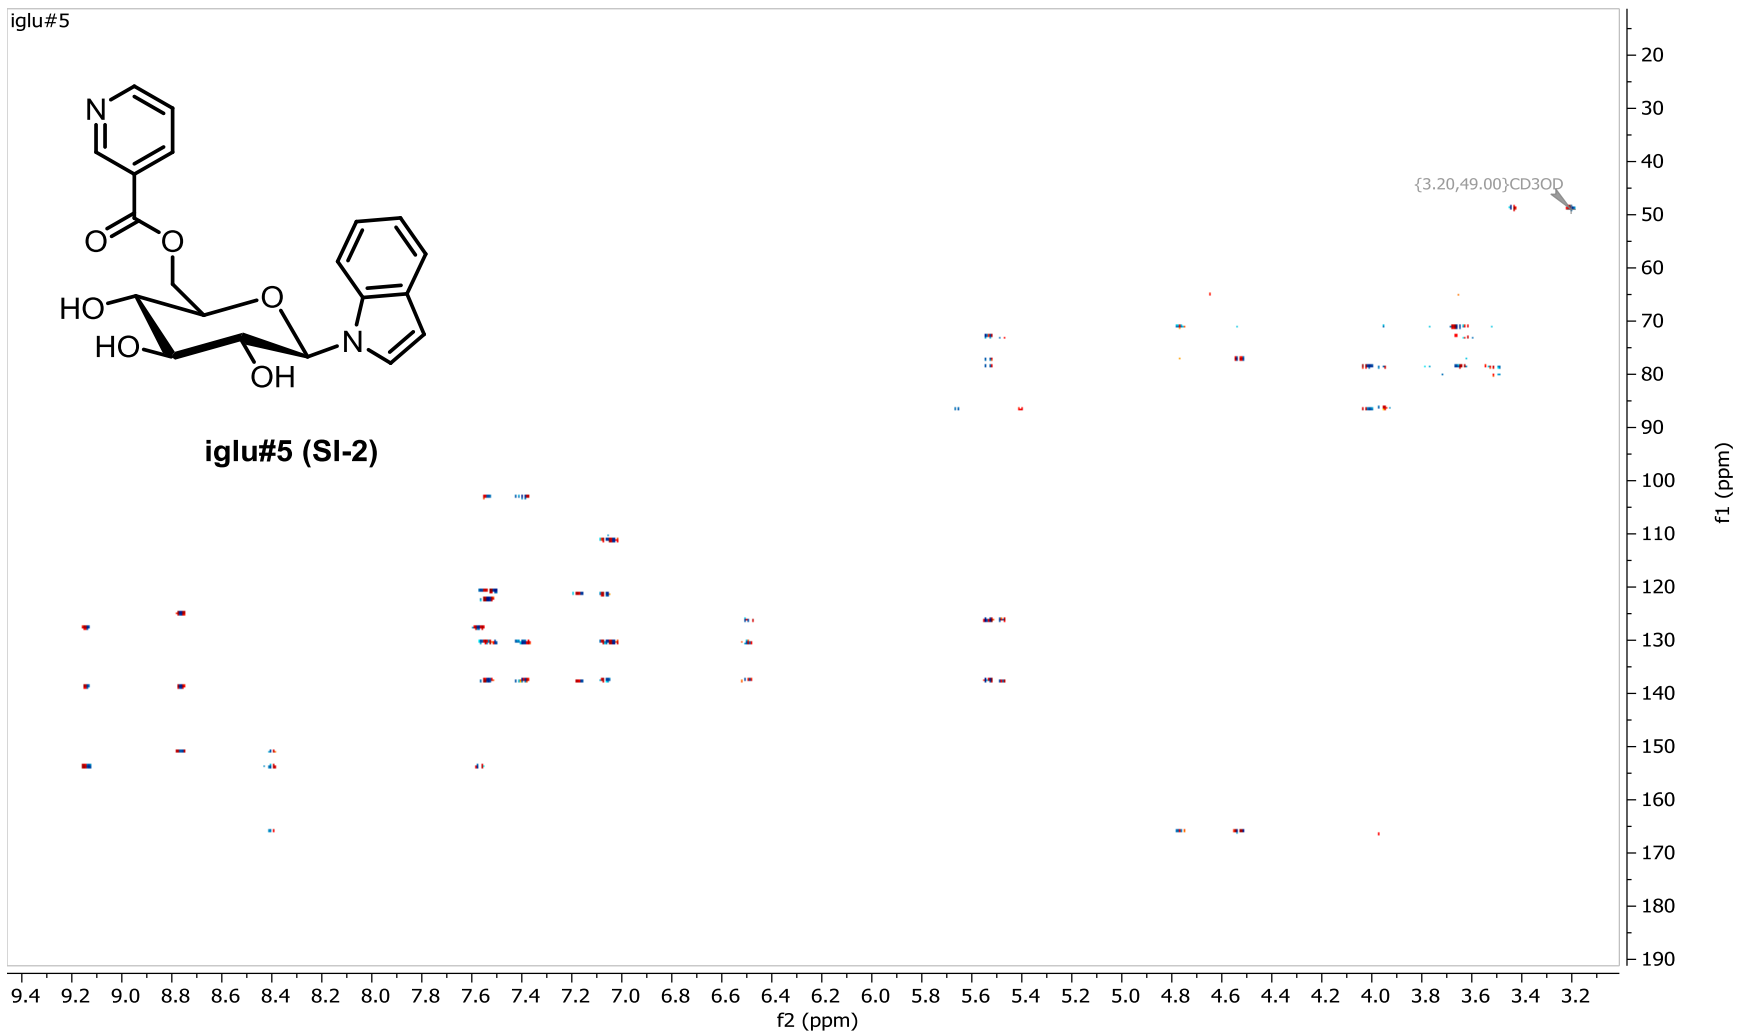

HMBC spectrum (600 MHz) of iglu#5 (**SI-2**) in methanol- $d_4$ .

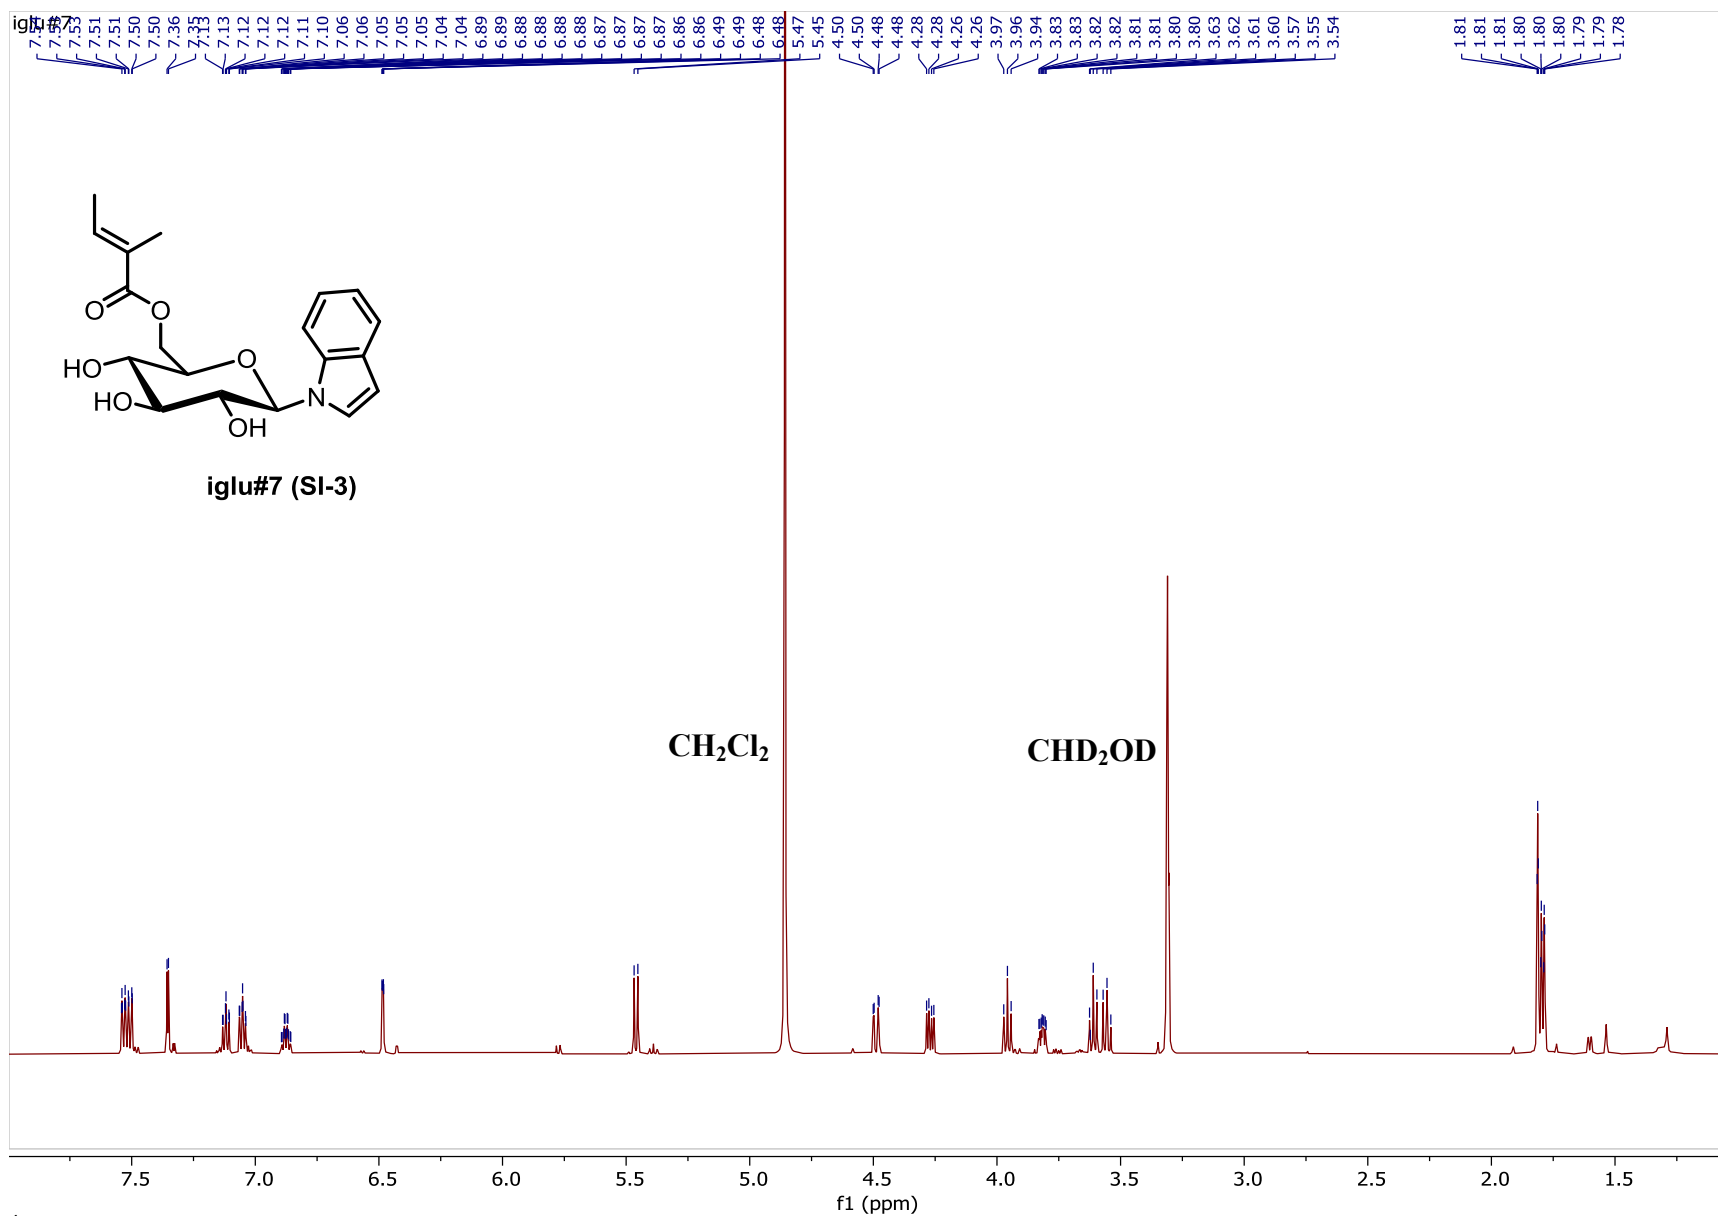

<sup>1</sup>H NMR spectrum (600 MHz) of iglu#7 (SI-3) in methanol-*d*<sub>4</sub>.



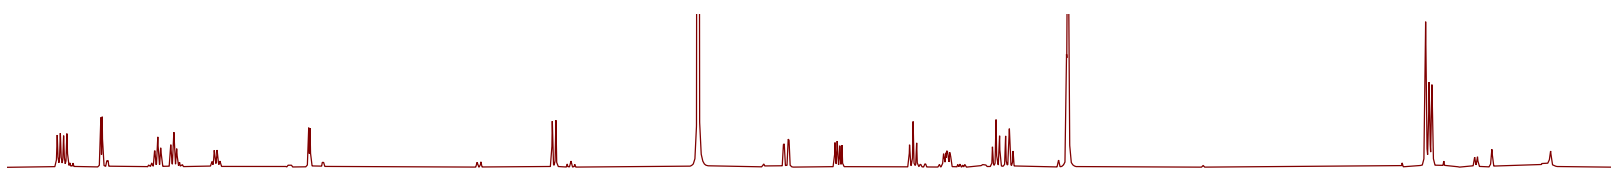

iglu#7

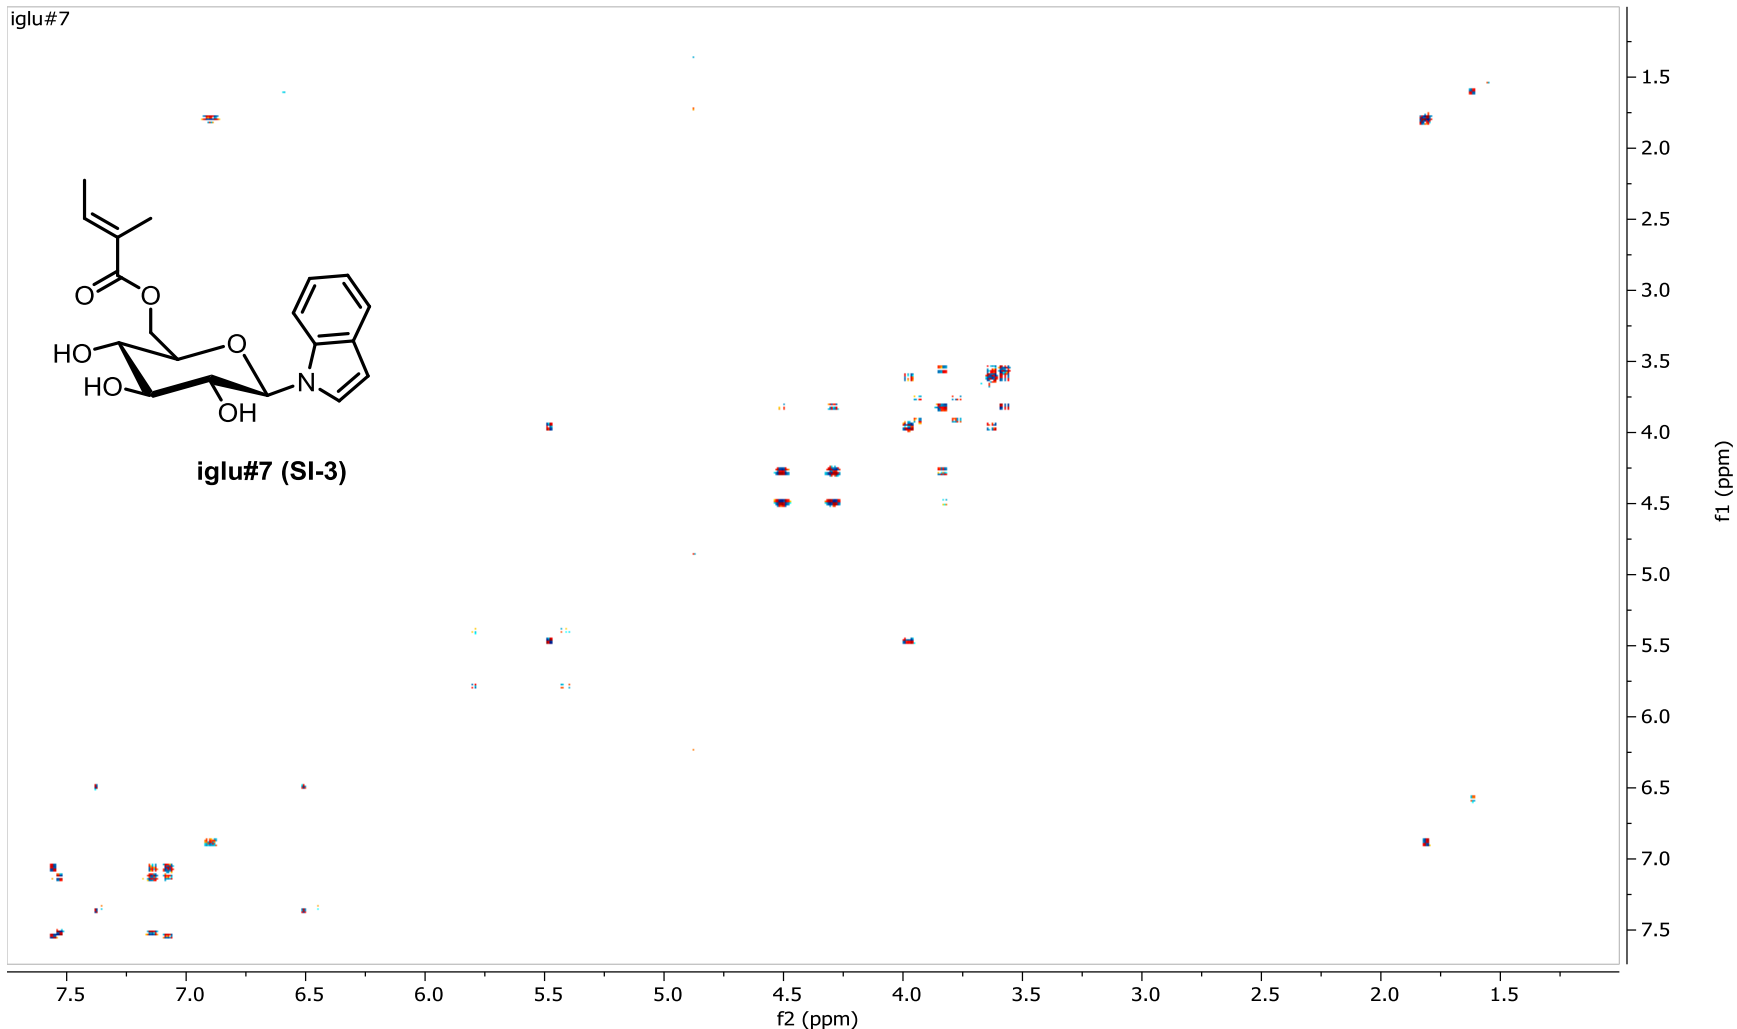

dqfCOSY spectrum (600 MHz) of iglu#7 (**SI-3**) in methanol- $d_4$ .

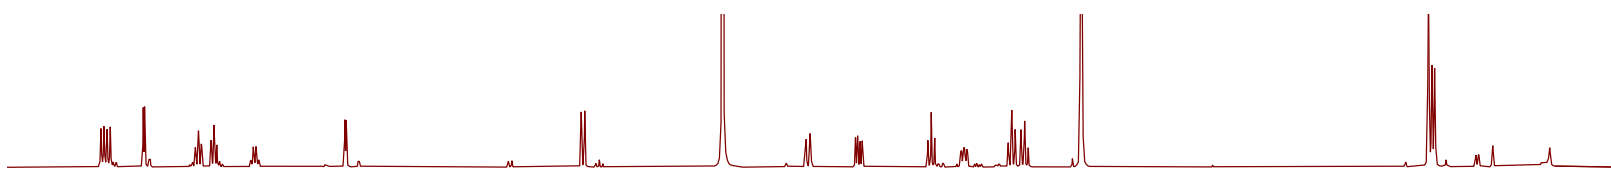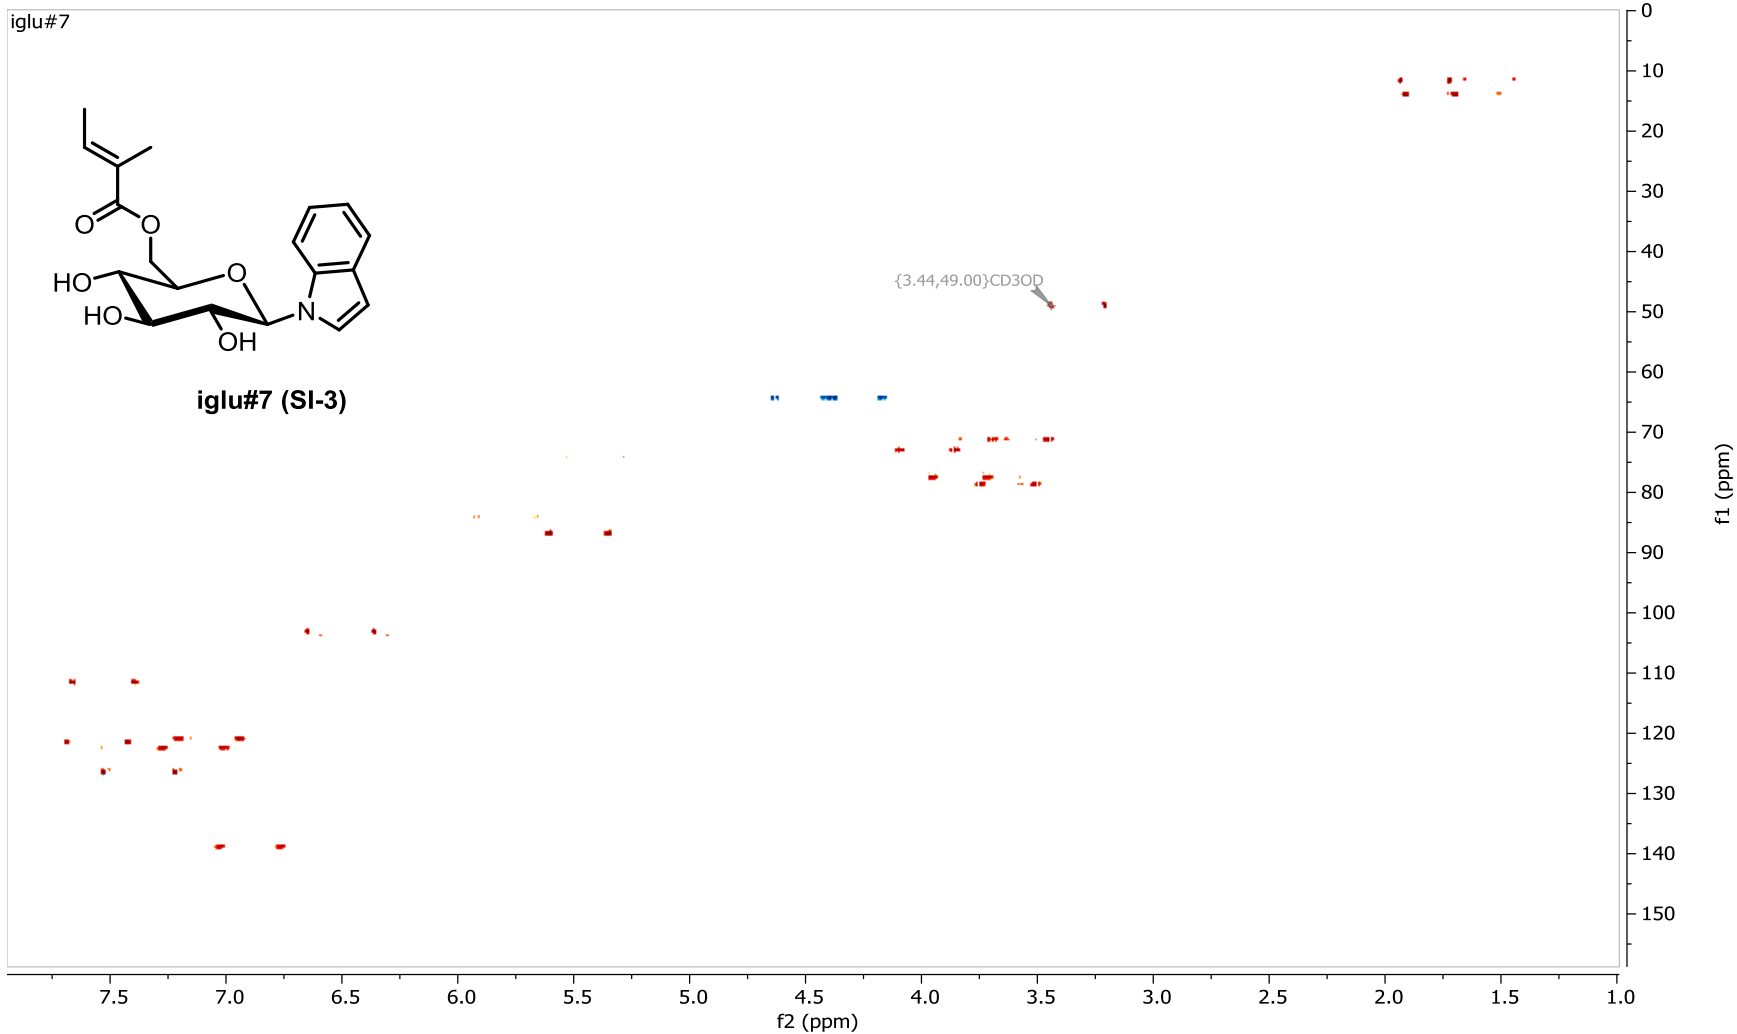

HSQC spectrum (600 MHz) of iglu#7 (SI-3) in methanol- $d_4$ .

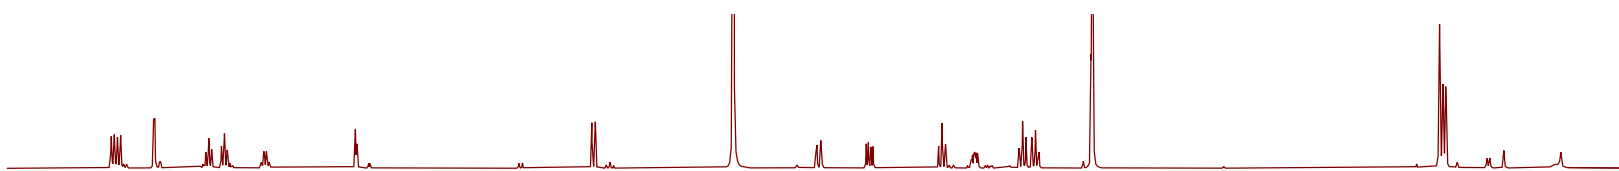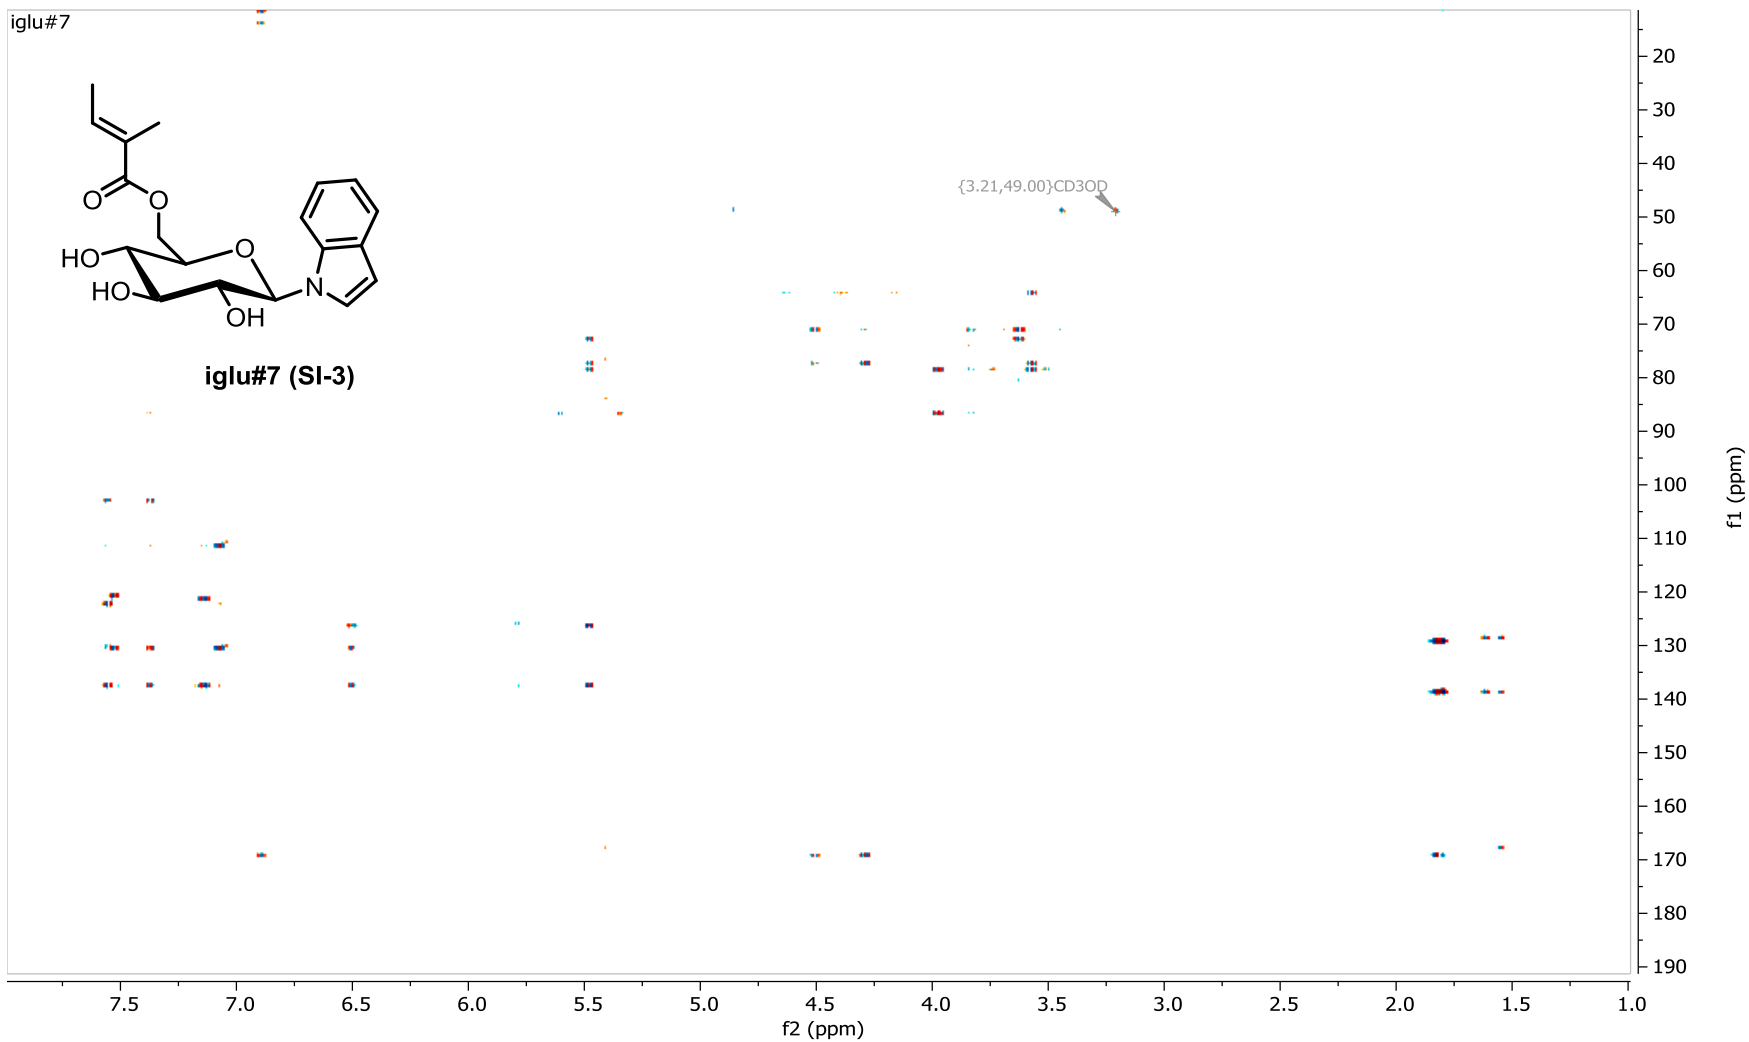

HMBC spectrum (600 MHz) of iglu#7 (SI-3) in methanol- $d_4$ .

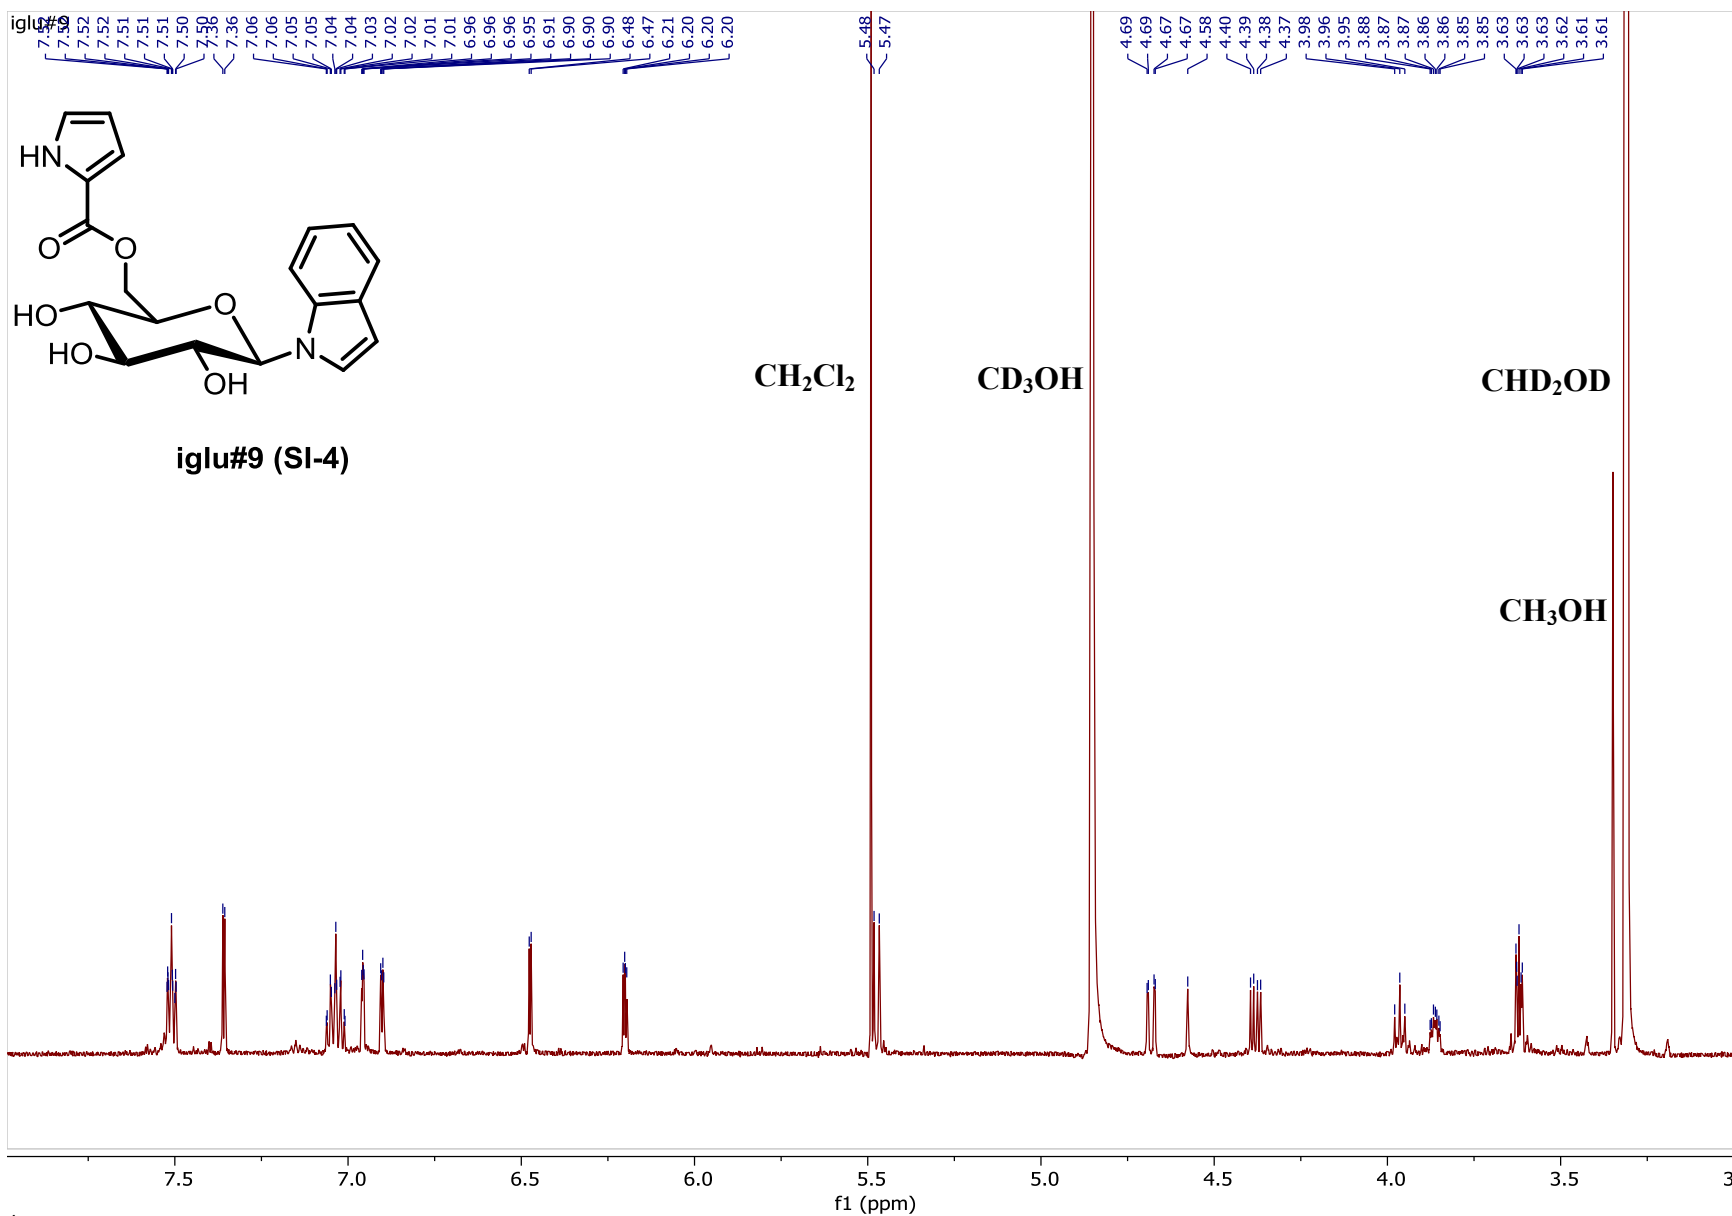

<sup>1</sup>H NMR spectrum (600 MHz) of iglu#9 (SI-4) in methanol-*d*<sub>4</sub>.

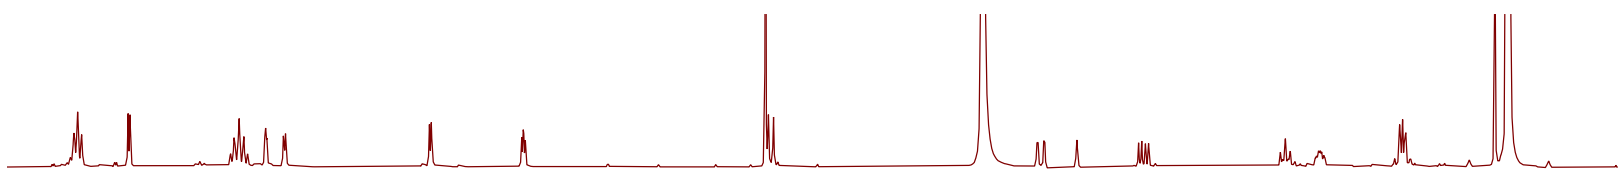

iglu#9

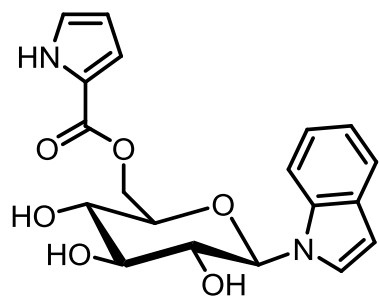

iglu#9 (SI-4)

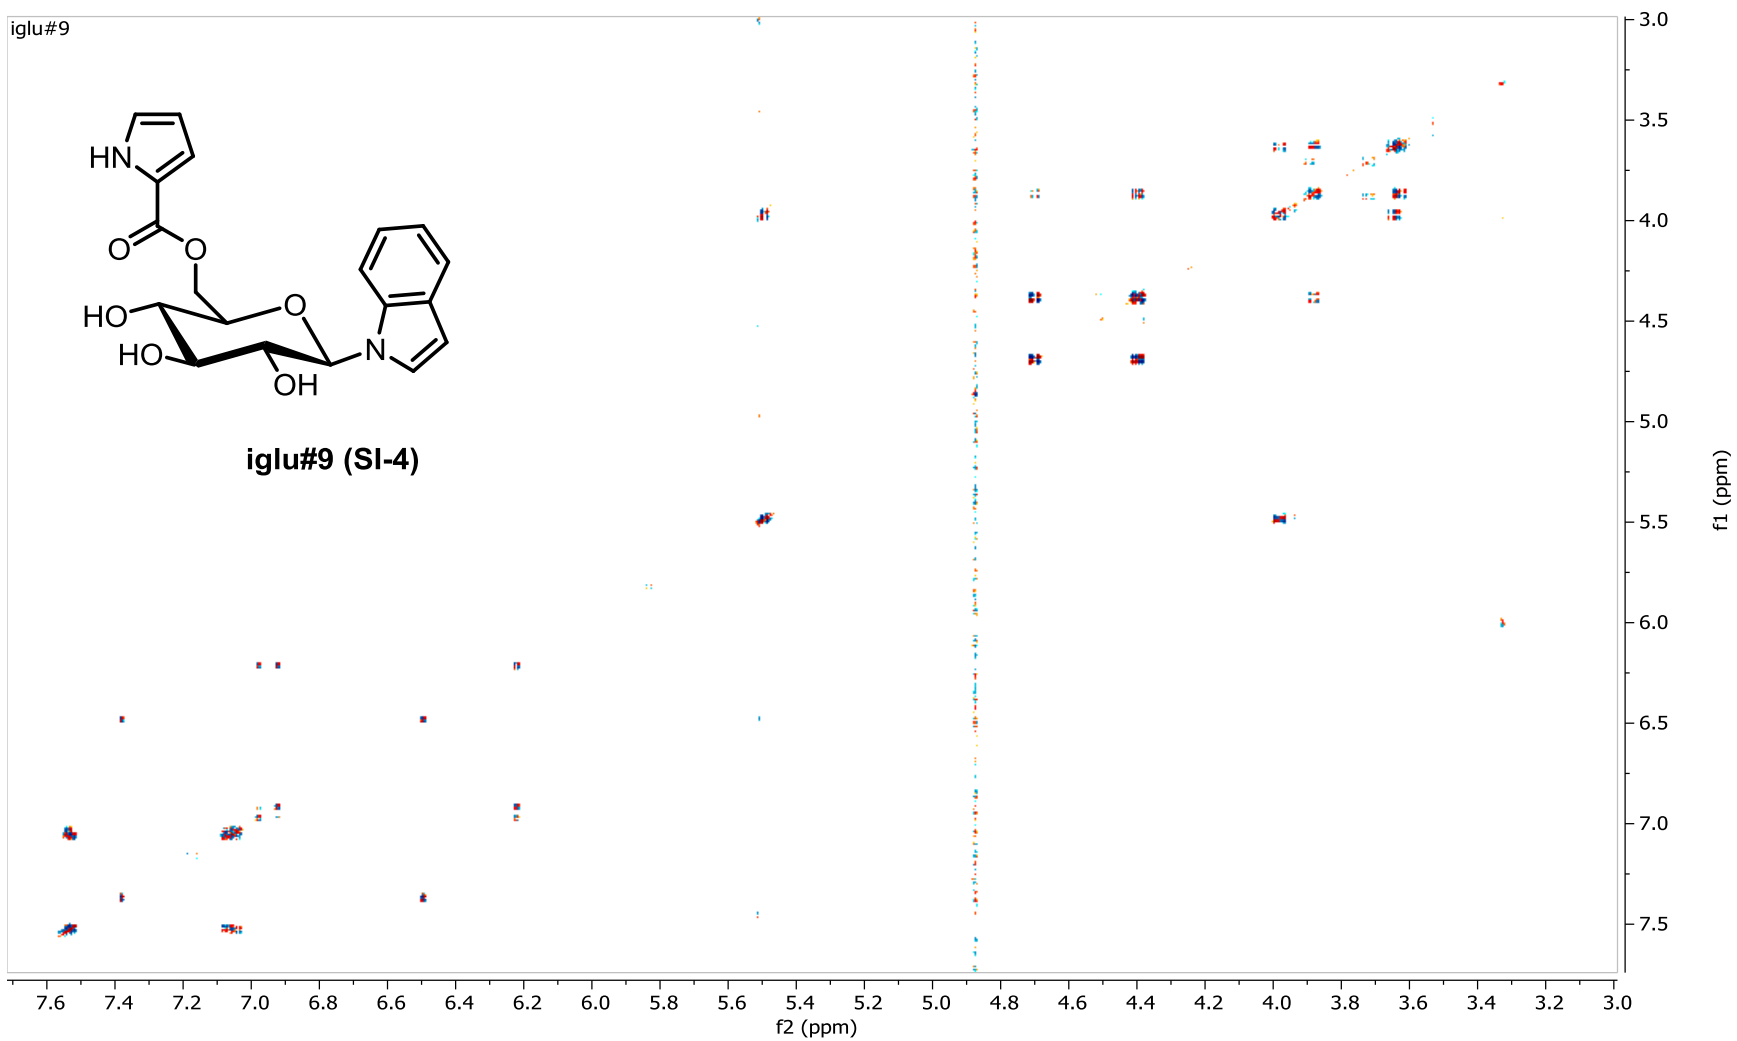

dqfCOSY spectrum (600 MHz) of iglu#9 (SI-4) in methanol- $d_4$ .

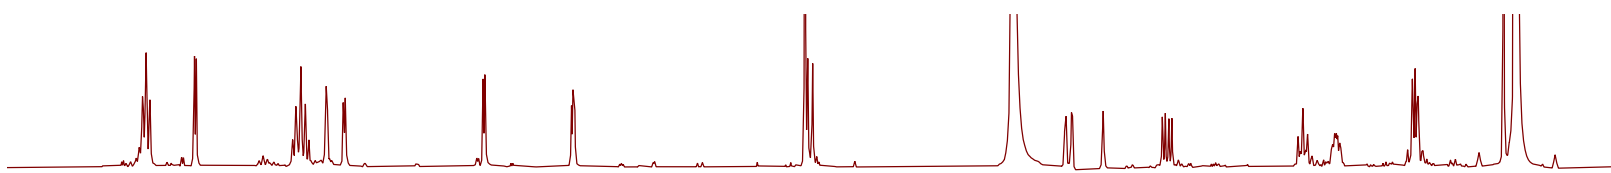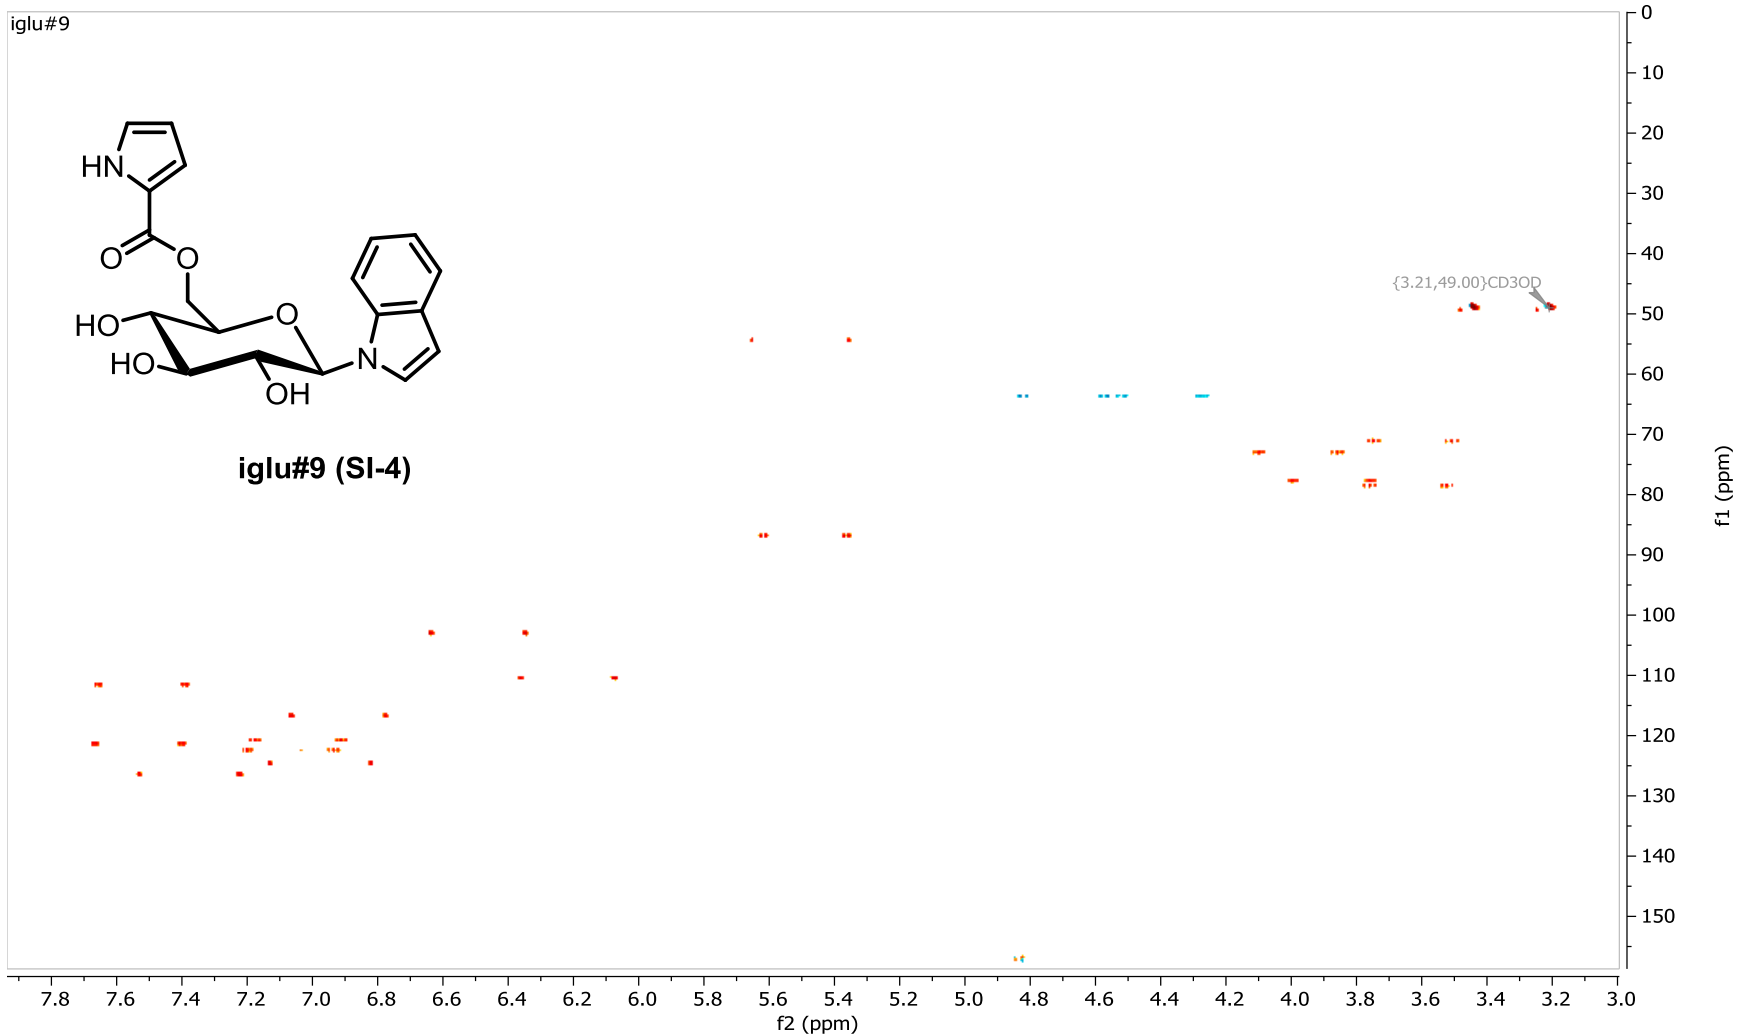

HSQC spectrum (600 MHz) of iglu#9 (SI-4) in methanol- $d_4$ .

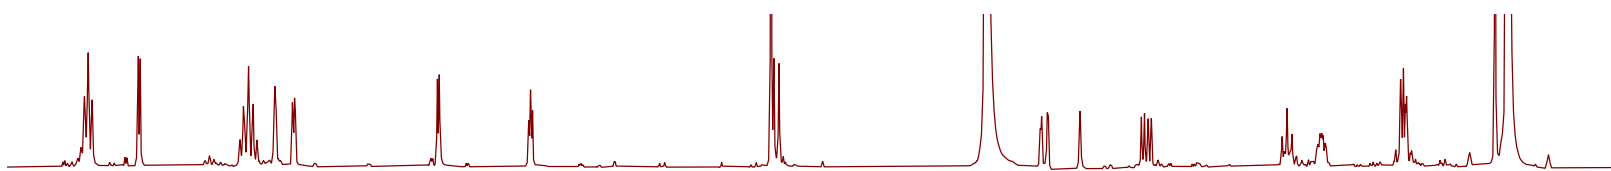

iglu#9

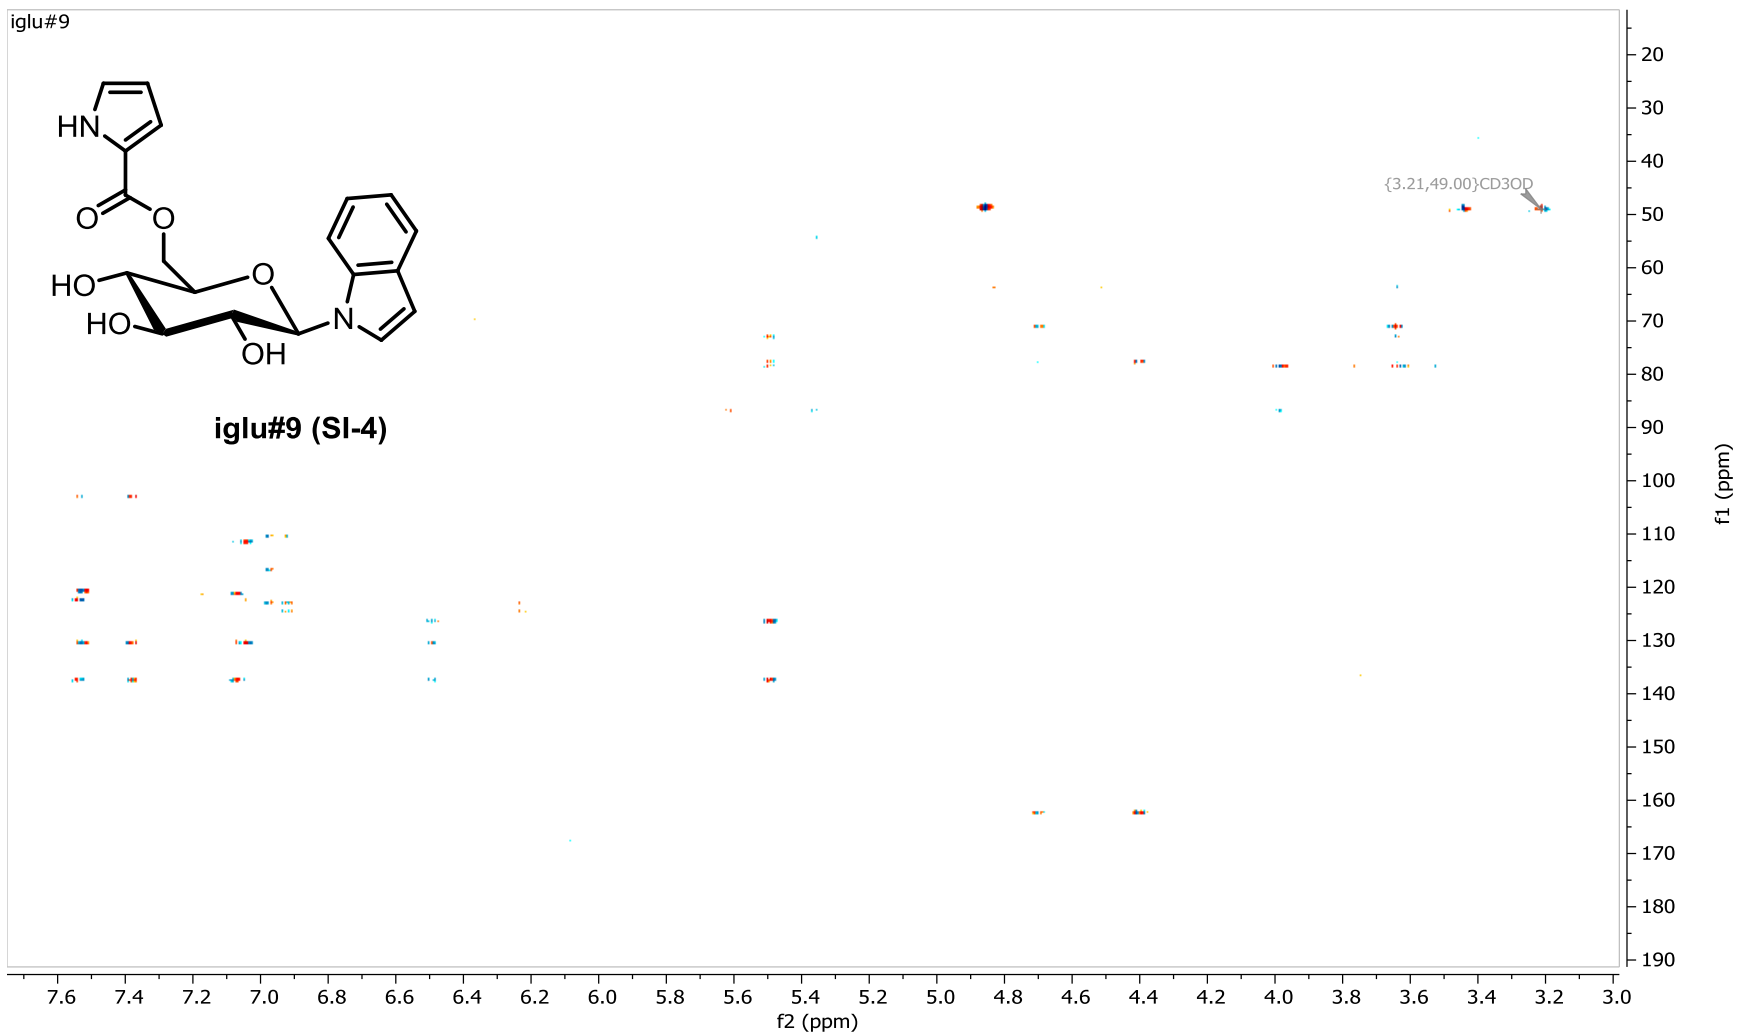

HMBC spectrum (600 MHz) of iglu#9 (SI-4) in methanol- $d_4$ .
