# Supplementary figures and images for: Modular metabolite assembly in Caenorhabditis elegans depends on carboxylesterases and formation of lysosome-related organelles
Source: eLife journal article supplement (doi:10.7554/elife.61886), 2020-10-16

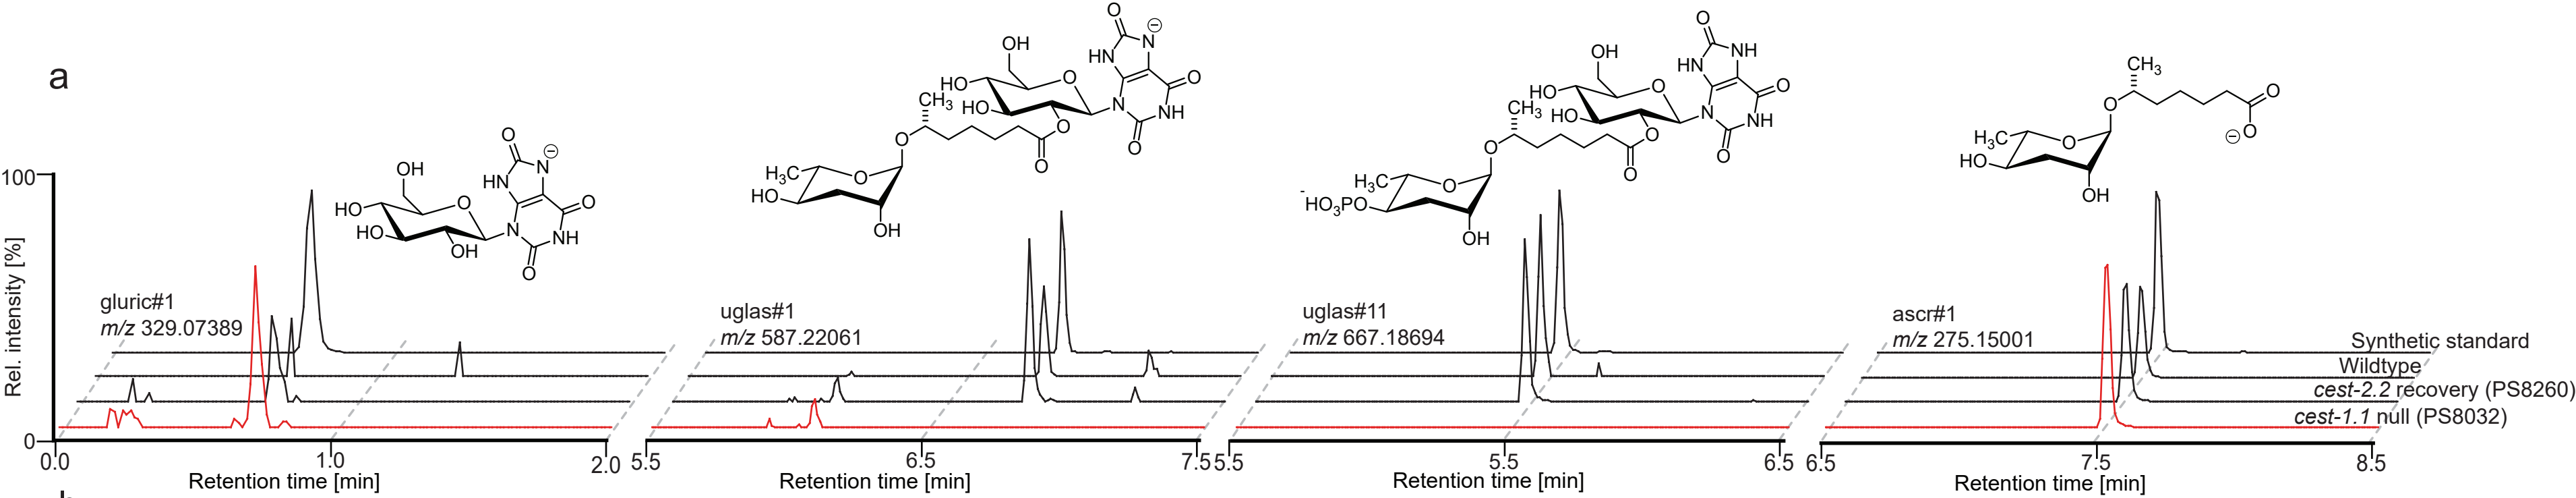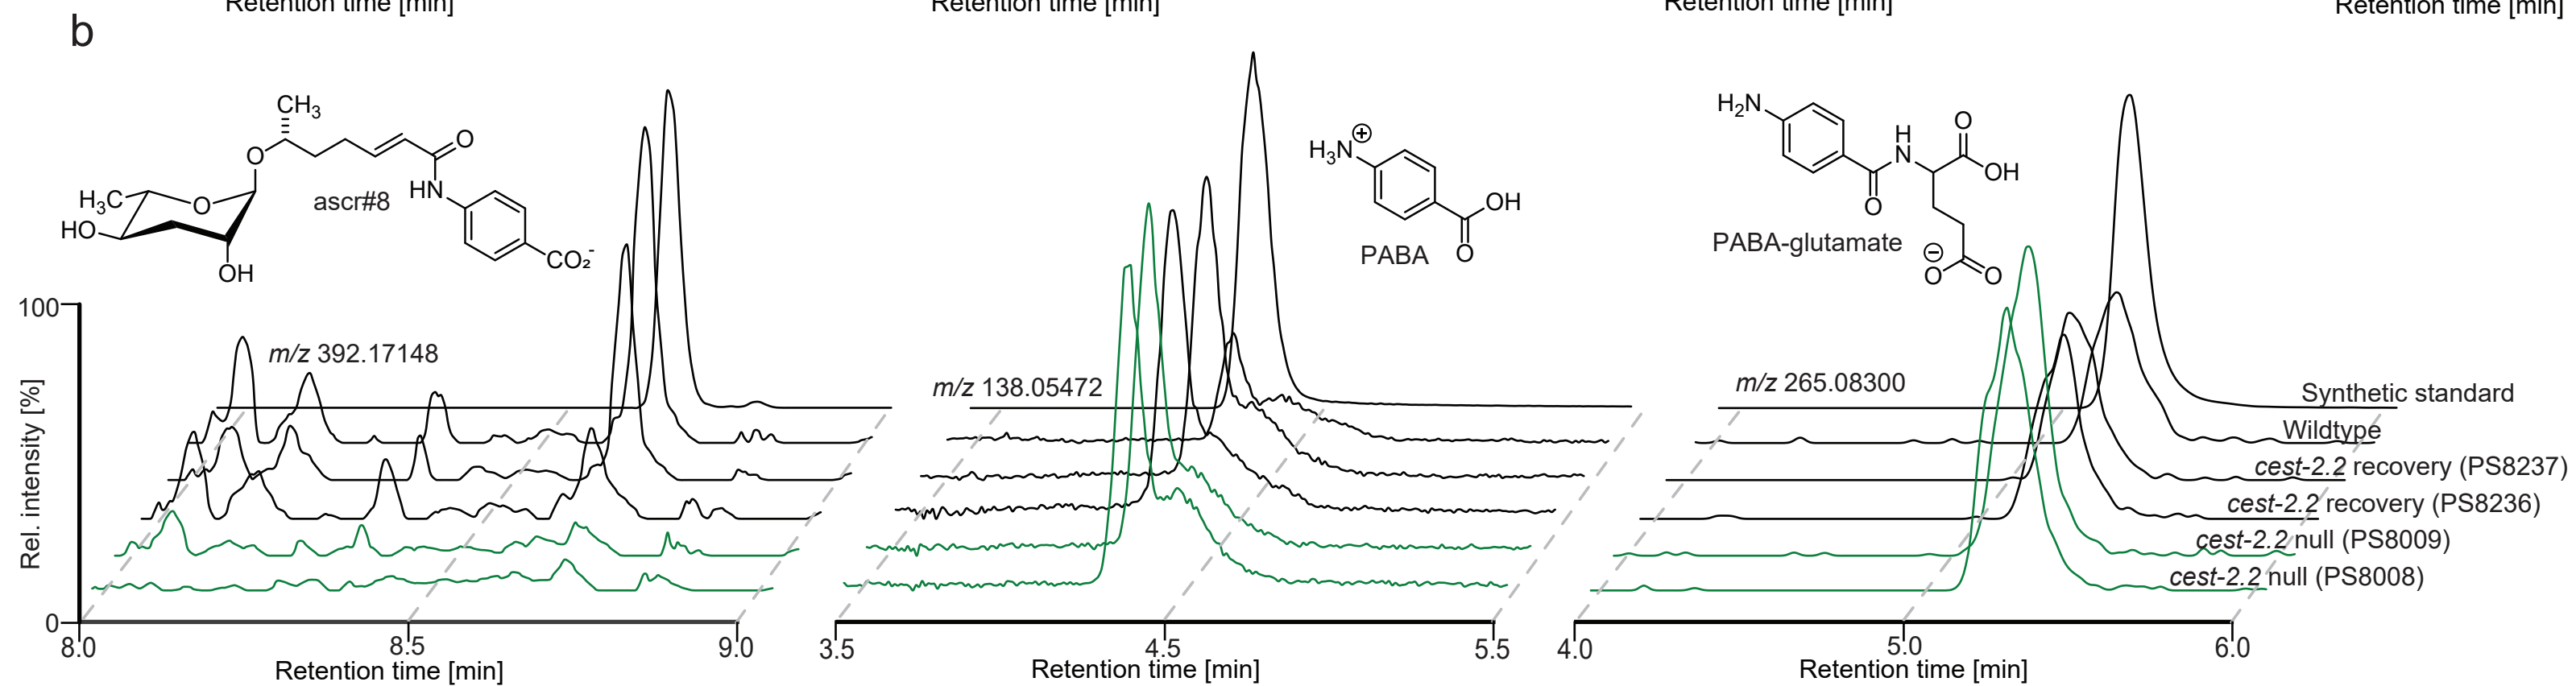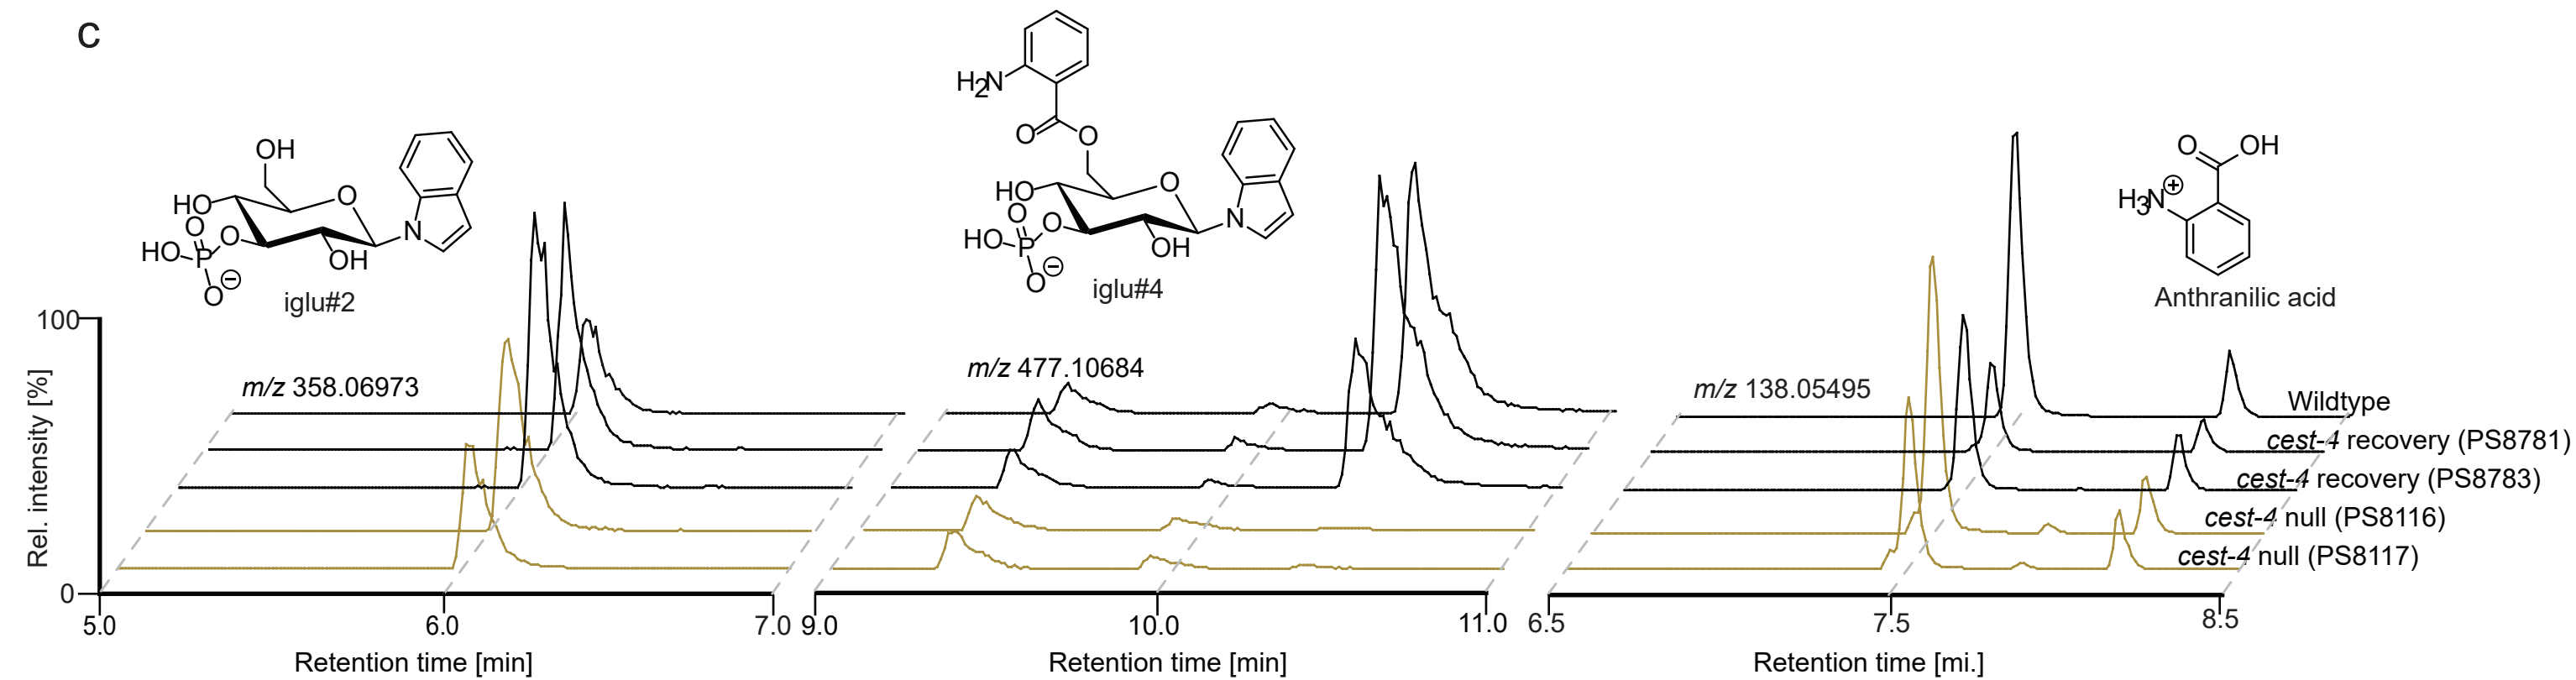

Supplement: supp [file elife-61886-supp-v1.zip]

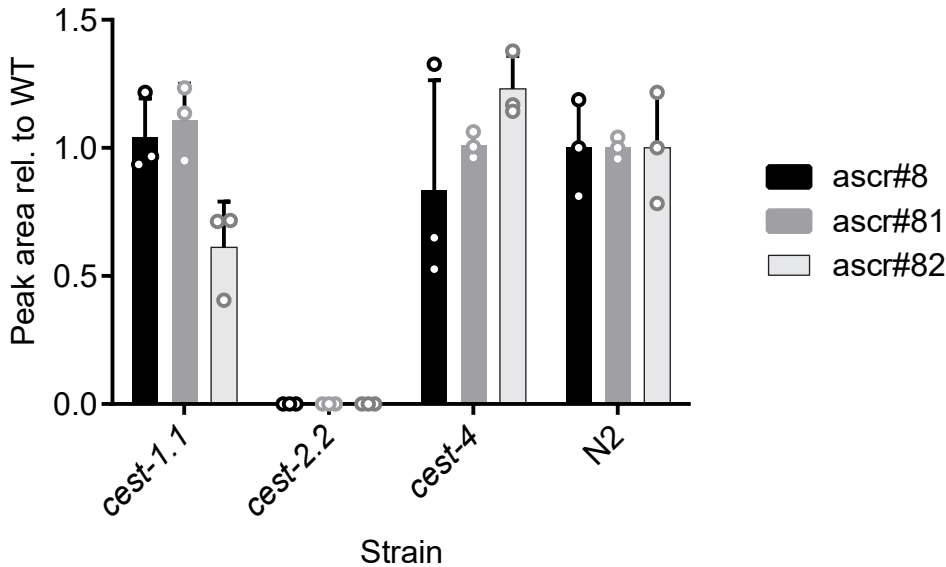

Supplement: supp [file elife-61886-supp-v1.zip]

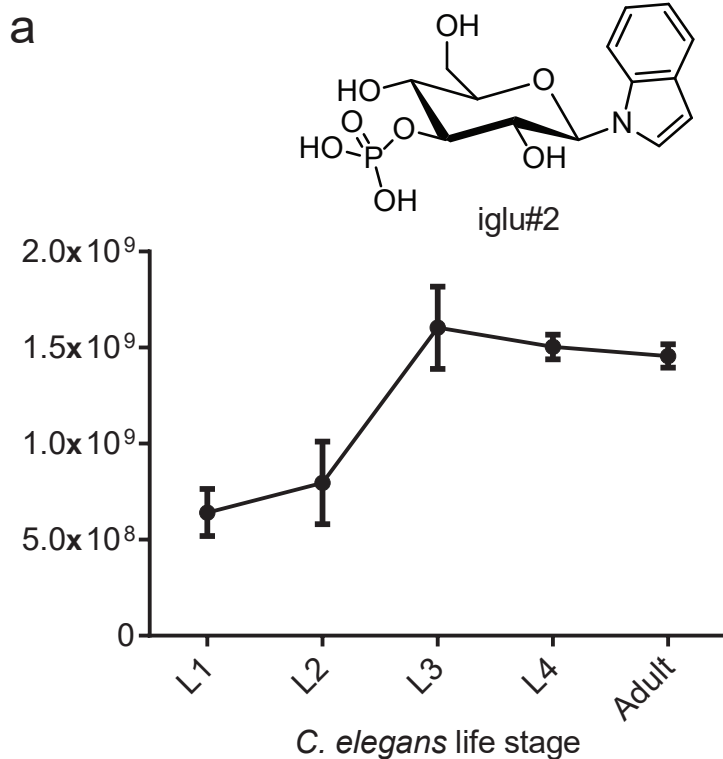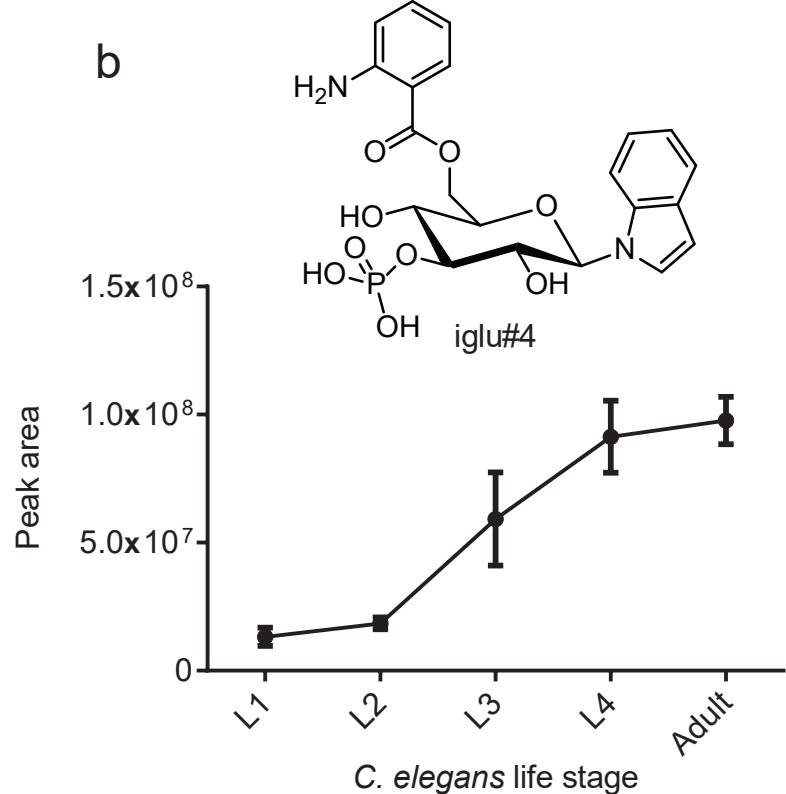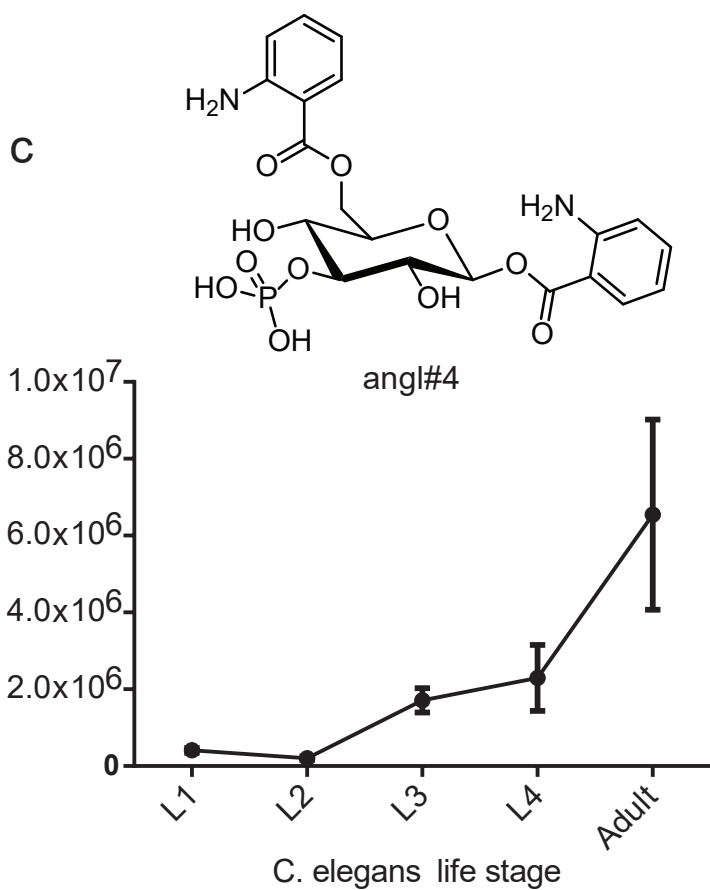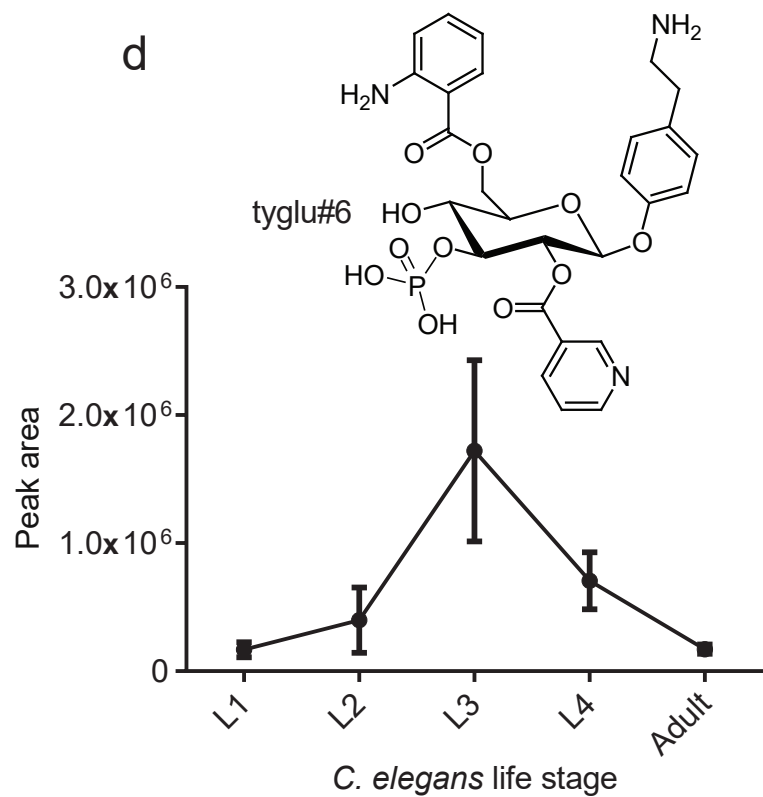

Supplement: supp [file elife-61886-supp-v1.zip]

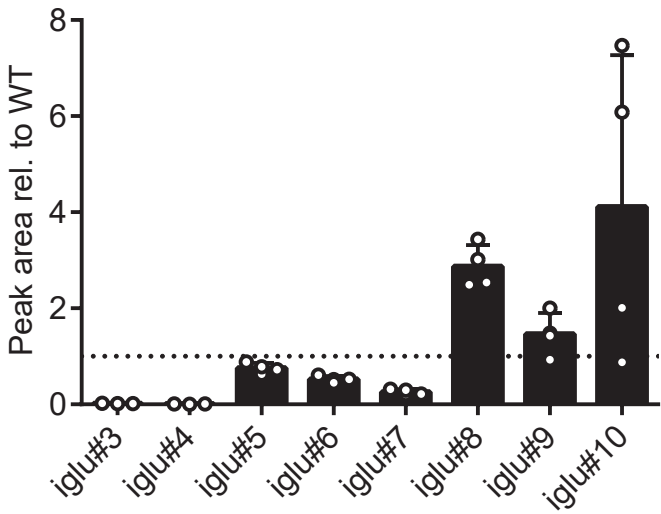

Supplement: supp [file elife-61886-supp-v1.zip]

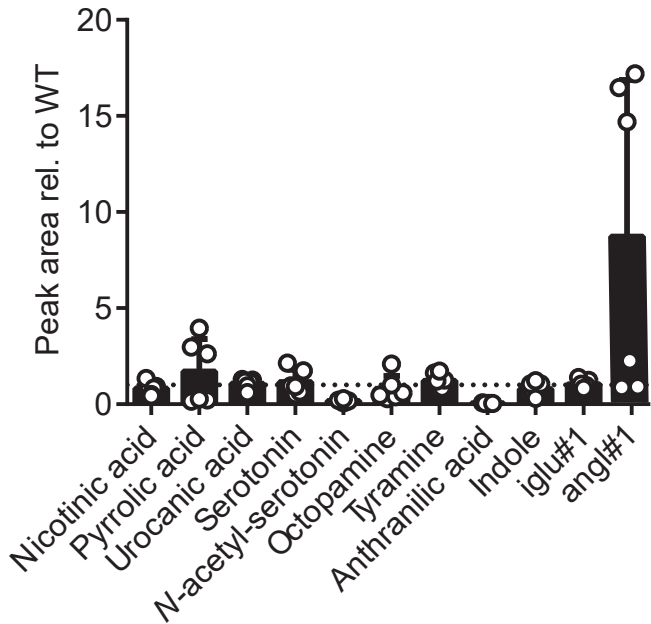

Supplement: supp [file elife-61886-supp-v1.zip]

# CEST-2.2-mCherry

Autofluorescence  
(green channel)

mCherry

Merge

DIC

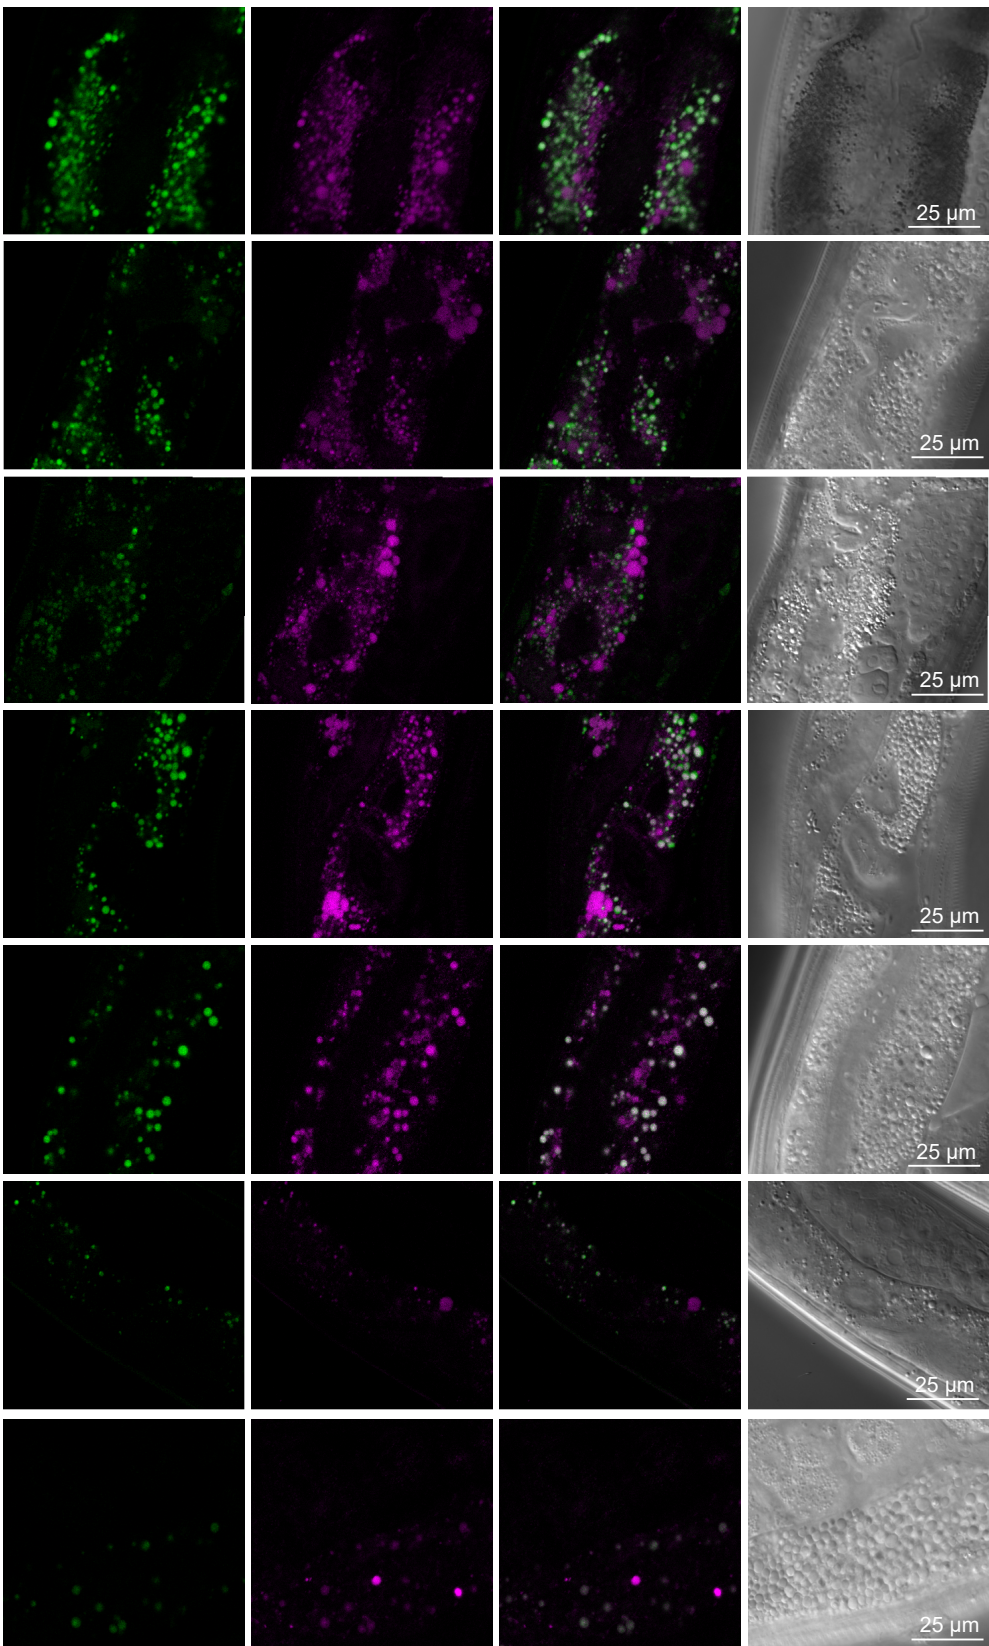

Supplement: supp [file elife-61886-supp-v1.zip]

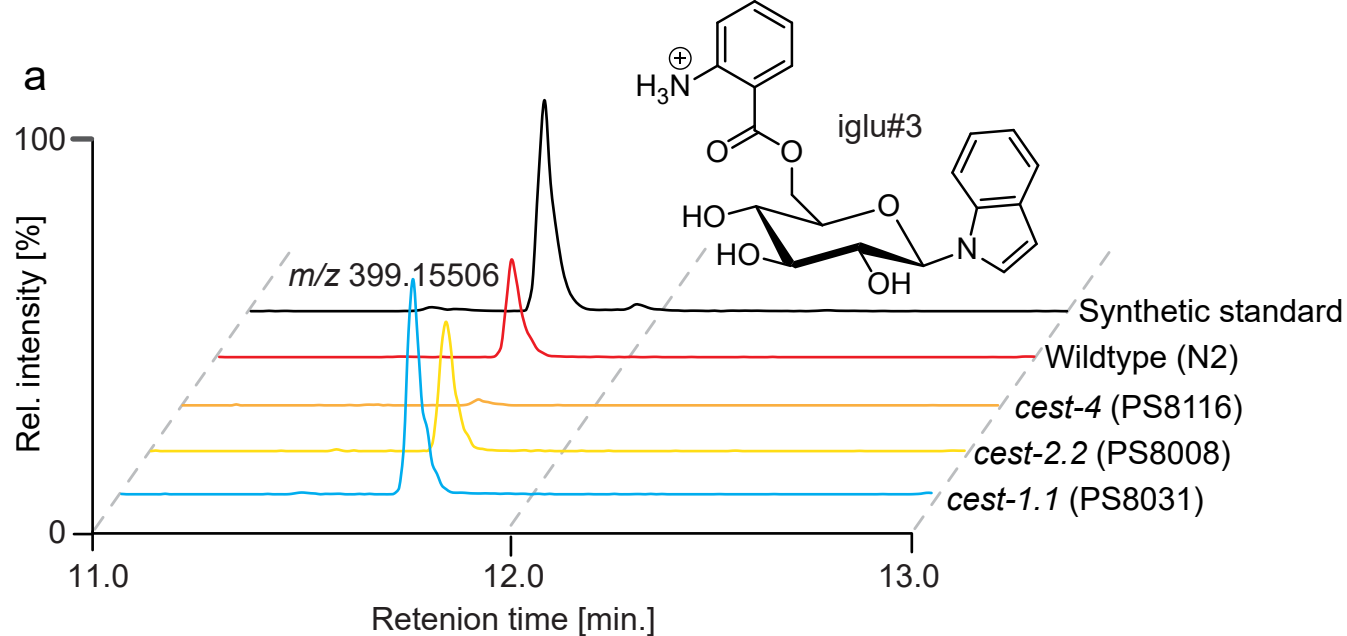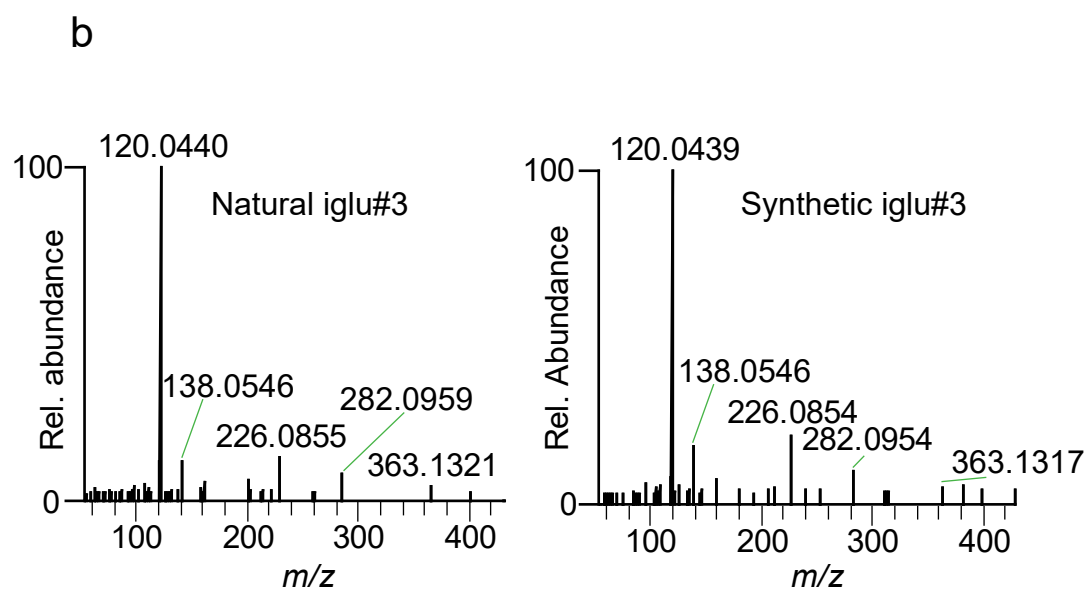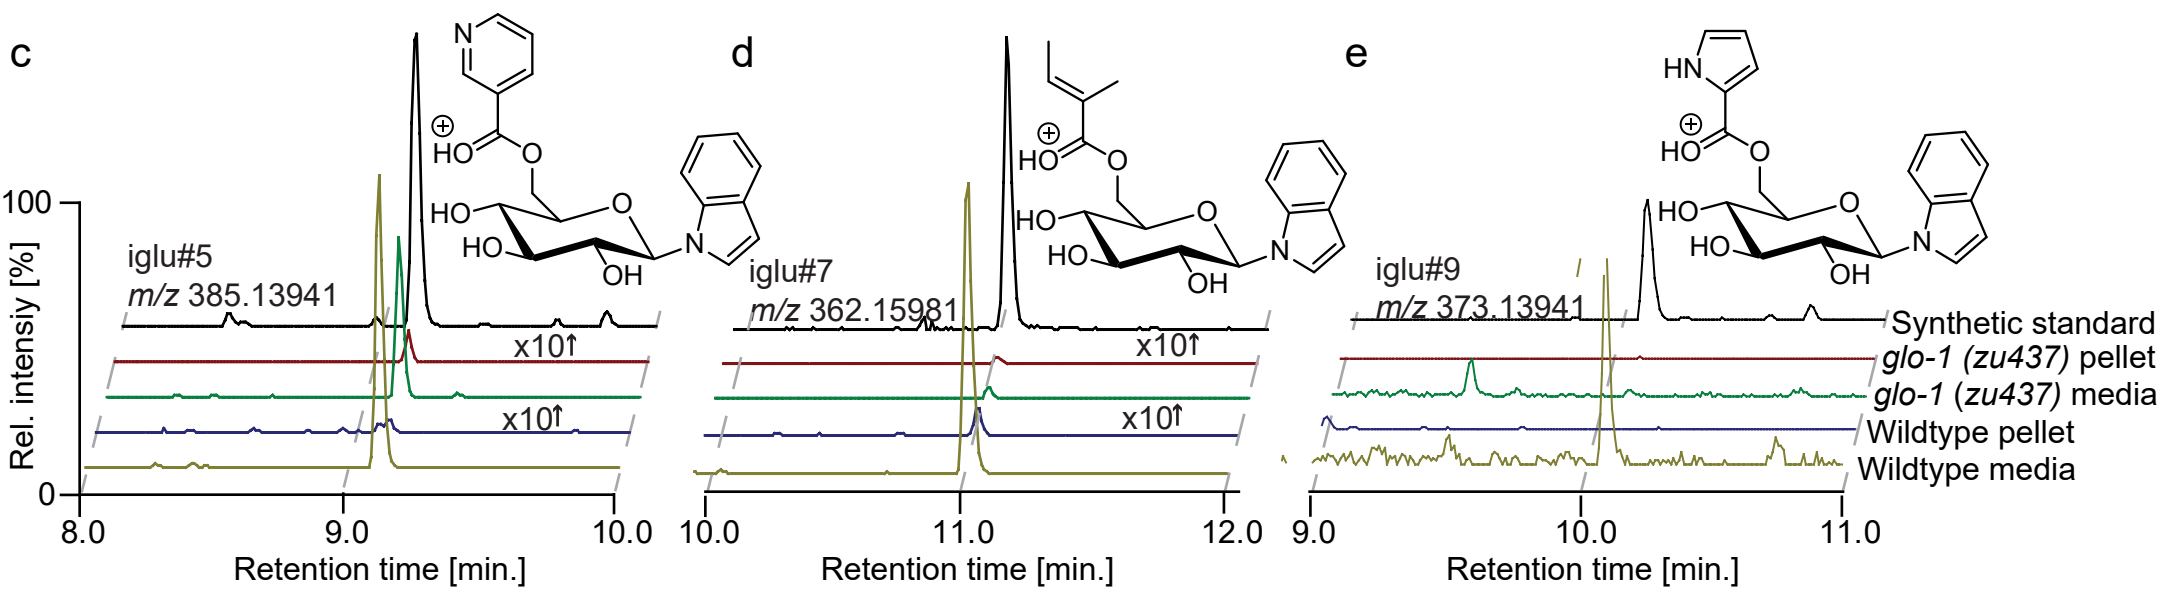

Supplement: supp [file elife-61886-supp-v1.zip]

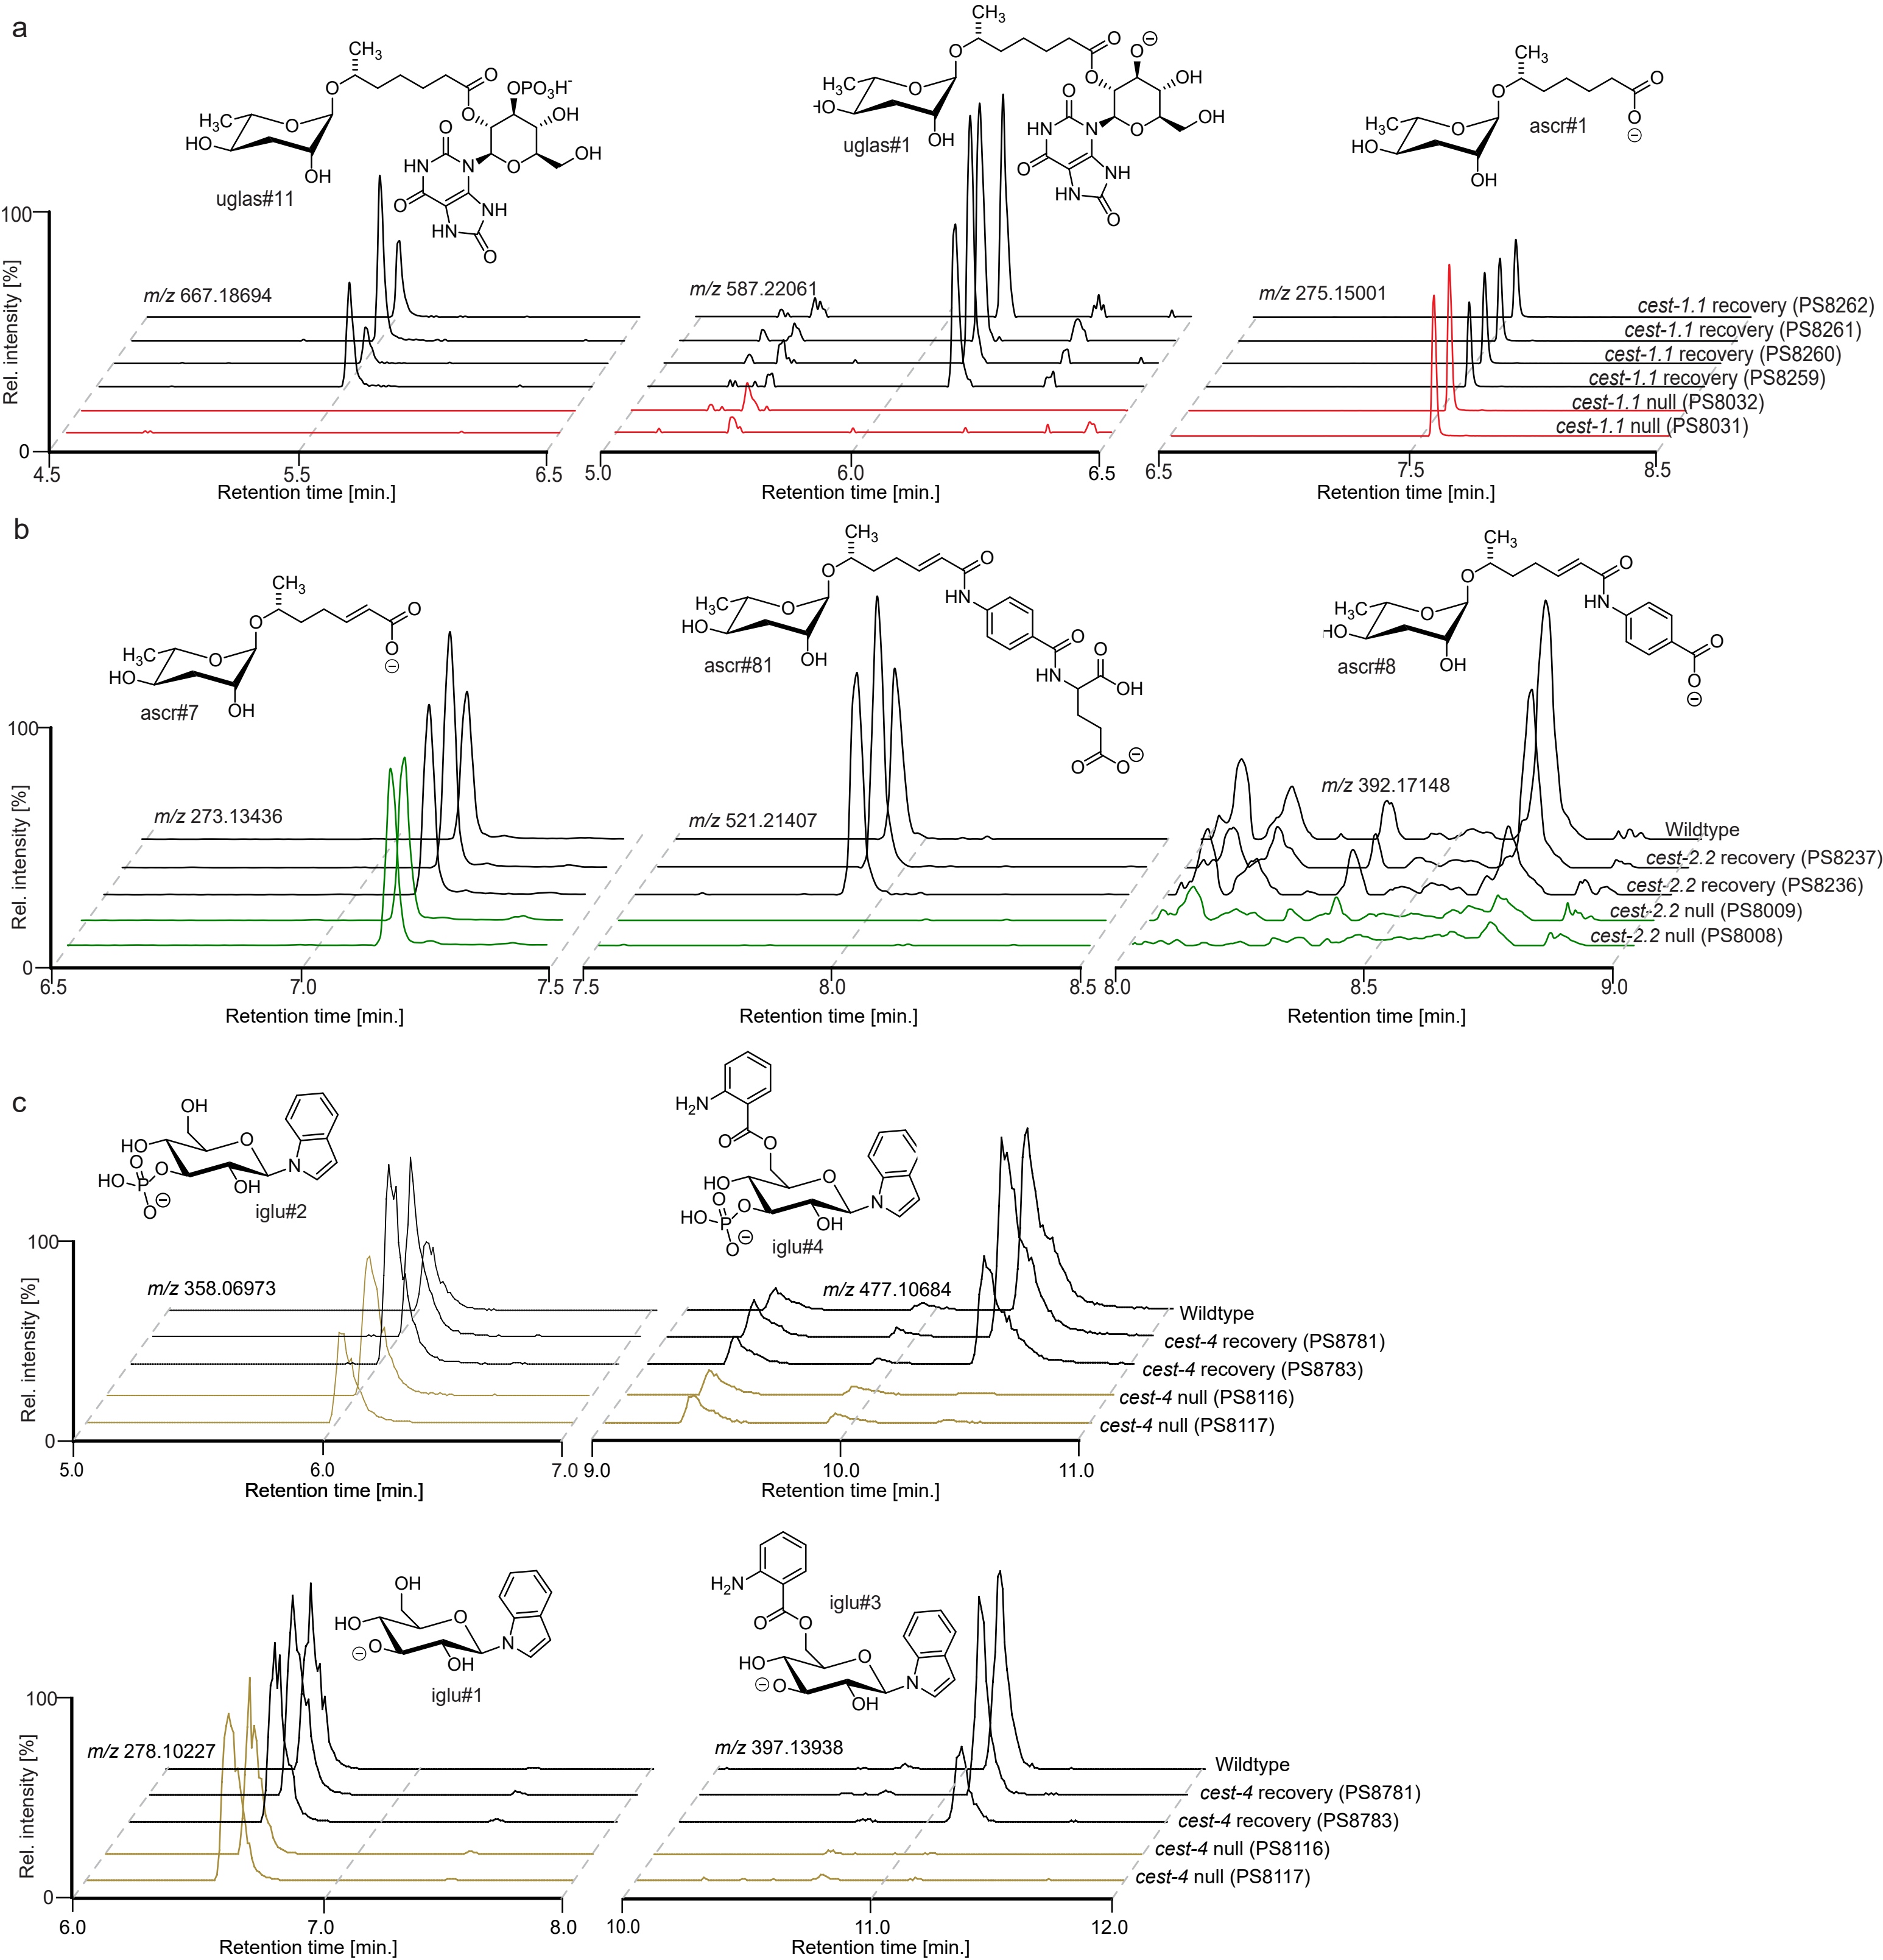

Supplement: supp [file elife-61886-supp-v1.zip]

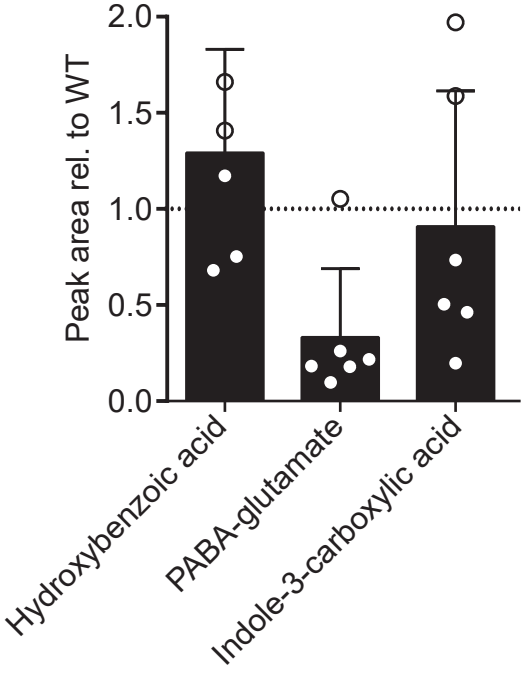

Supplement: supp [file elife-61886-supp-v1.zip]

# Wildtype (N2)

Autofluorescence  
(green channel)

mCherry

Merge

DIC

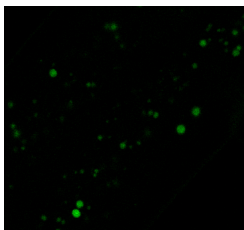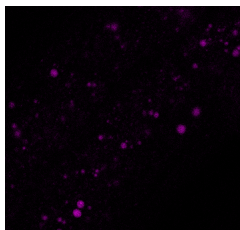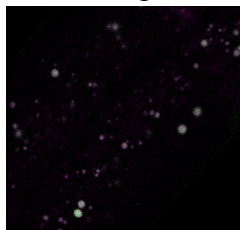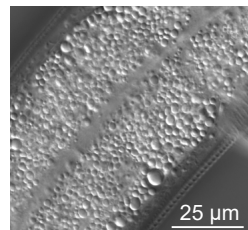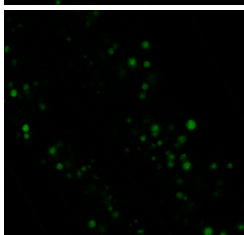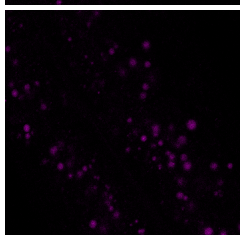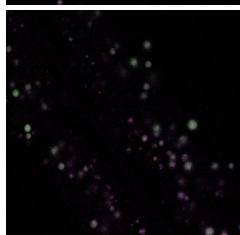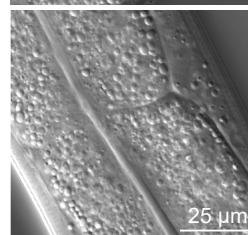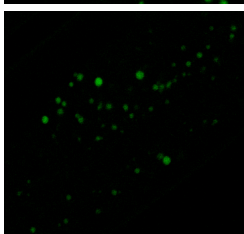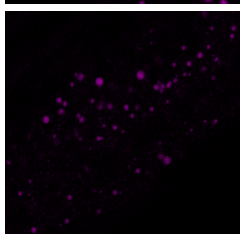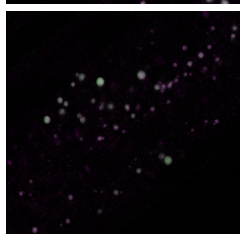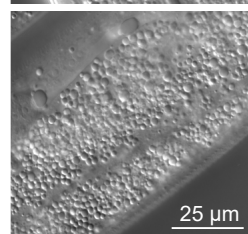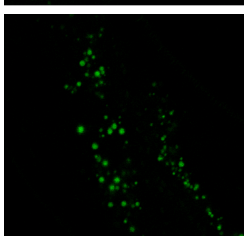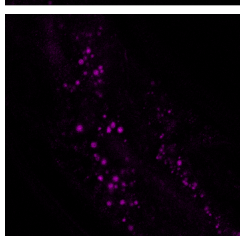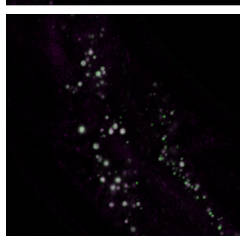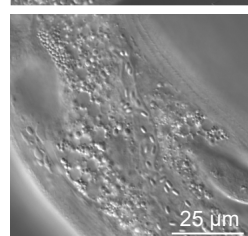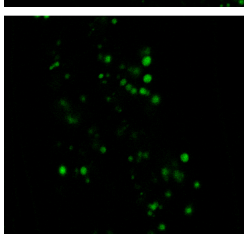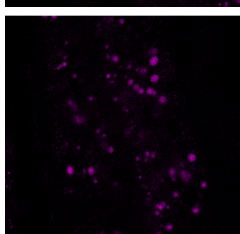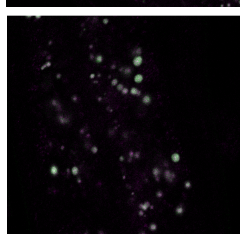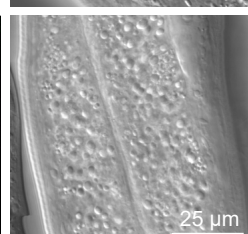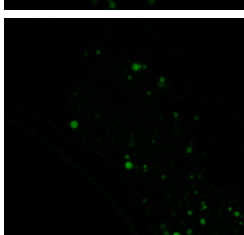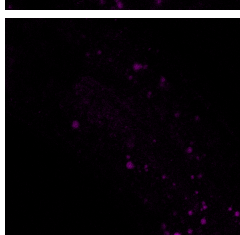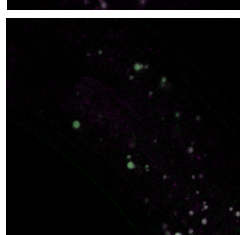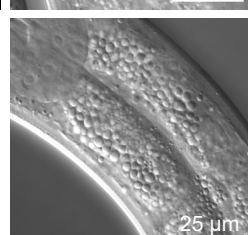

Supplement: supp [file elife-61886-supp-v1.zip]

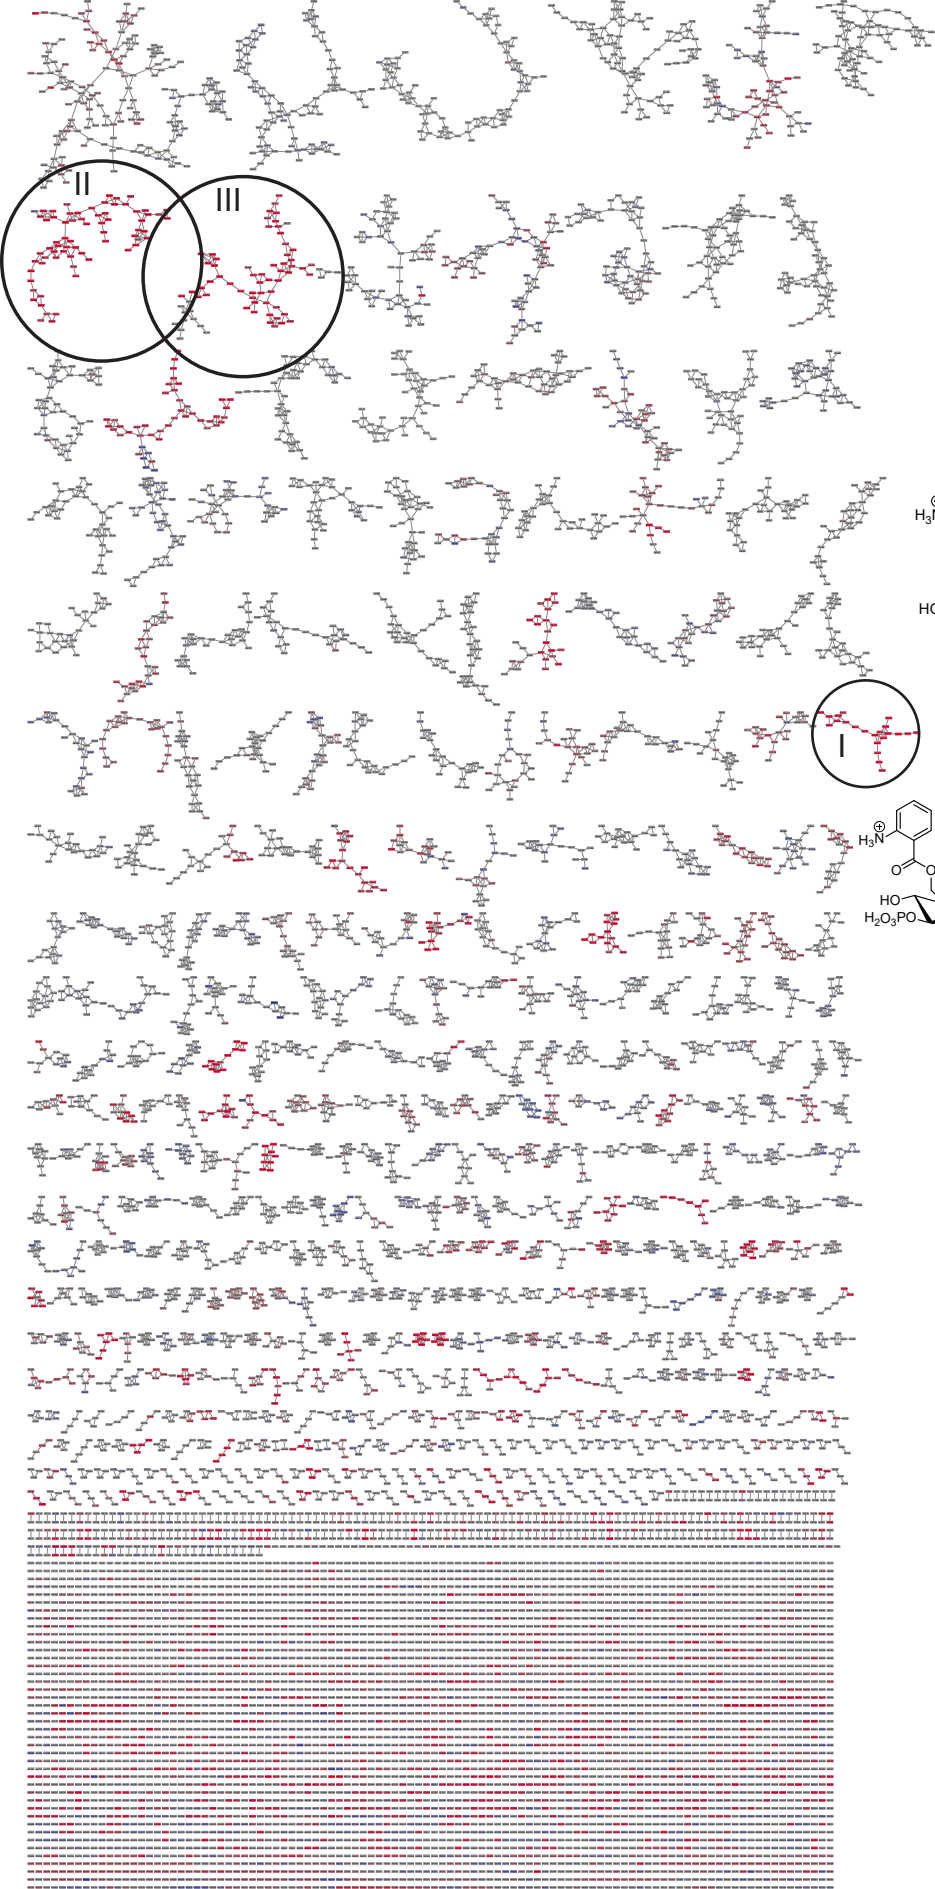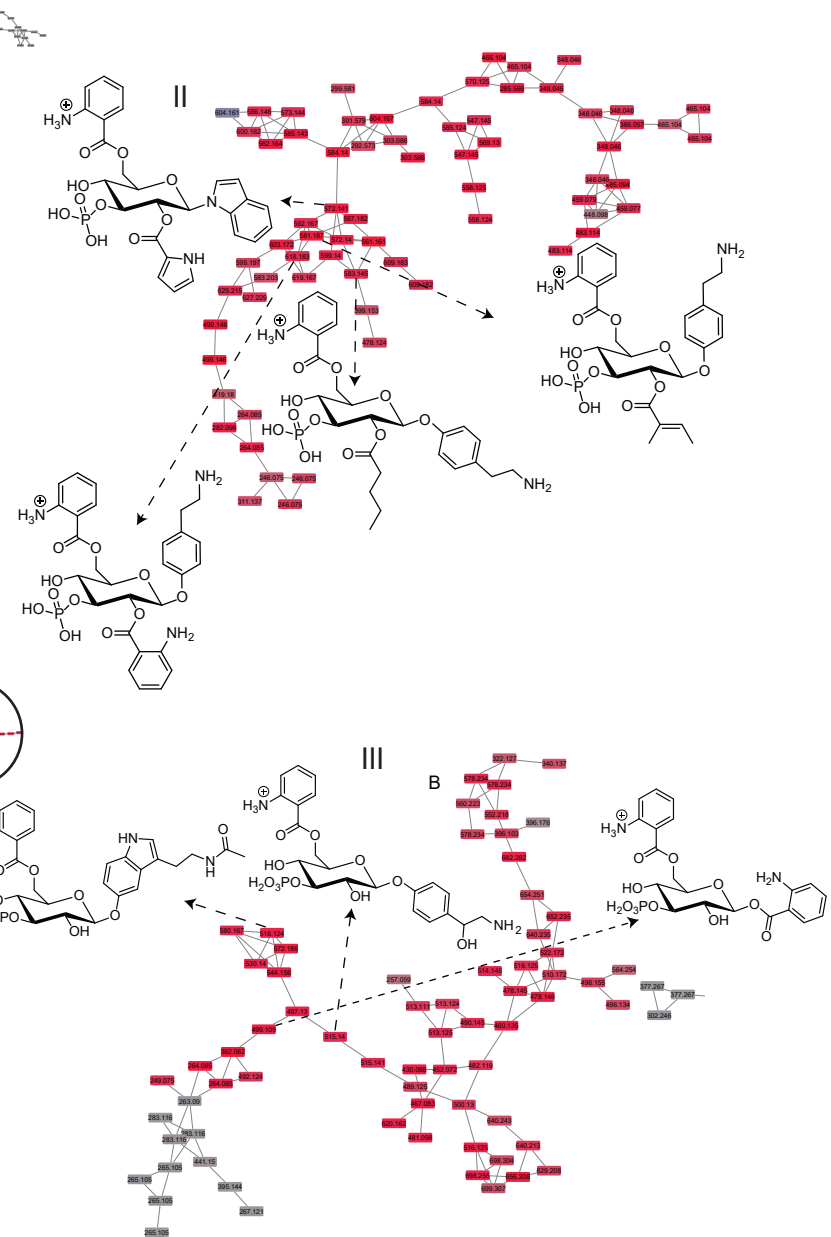

-15

*glo-1/wt* [log<sub>2</sub>]

15

Supplement: supp [file elife-61886-supp-v1.zip]

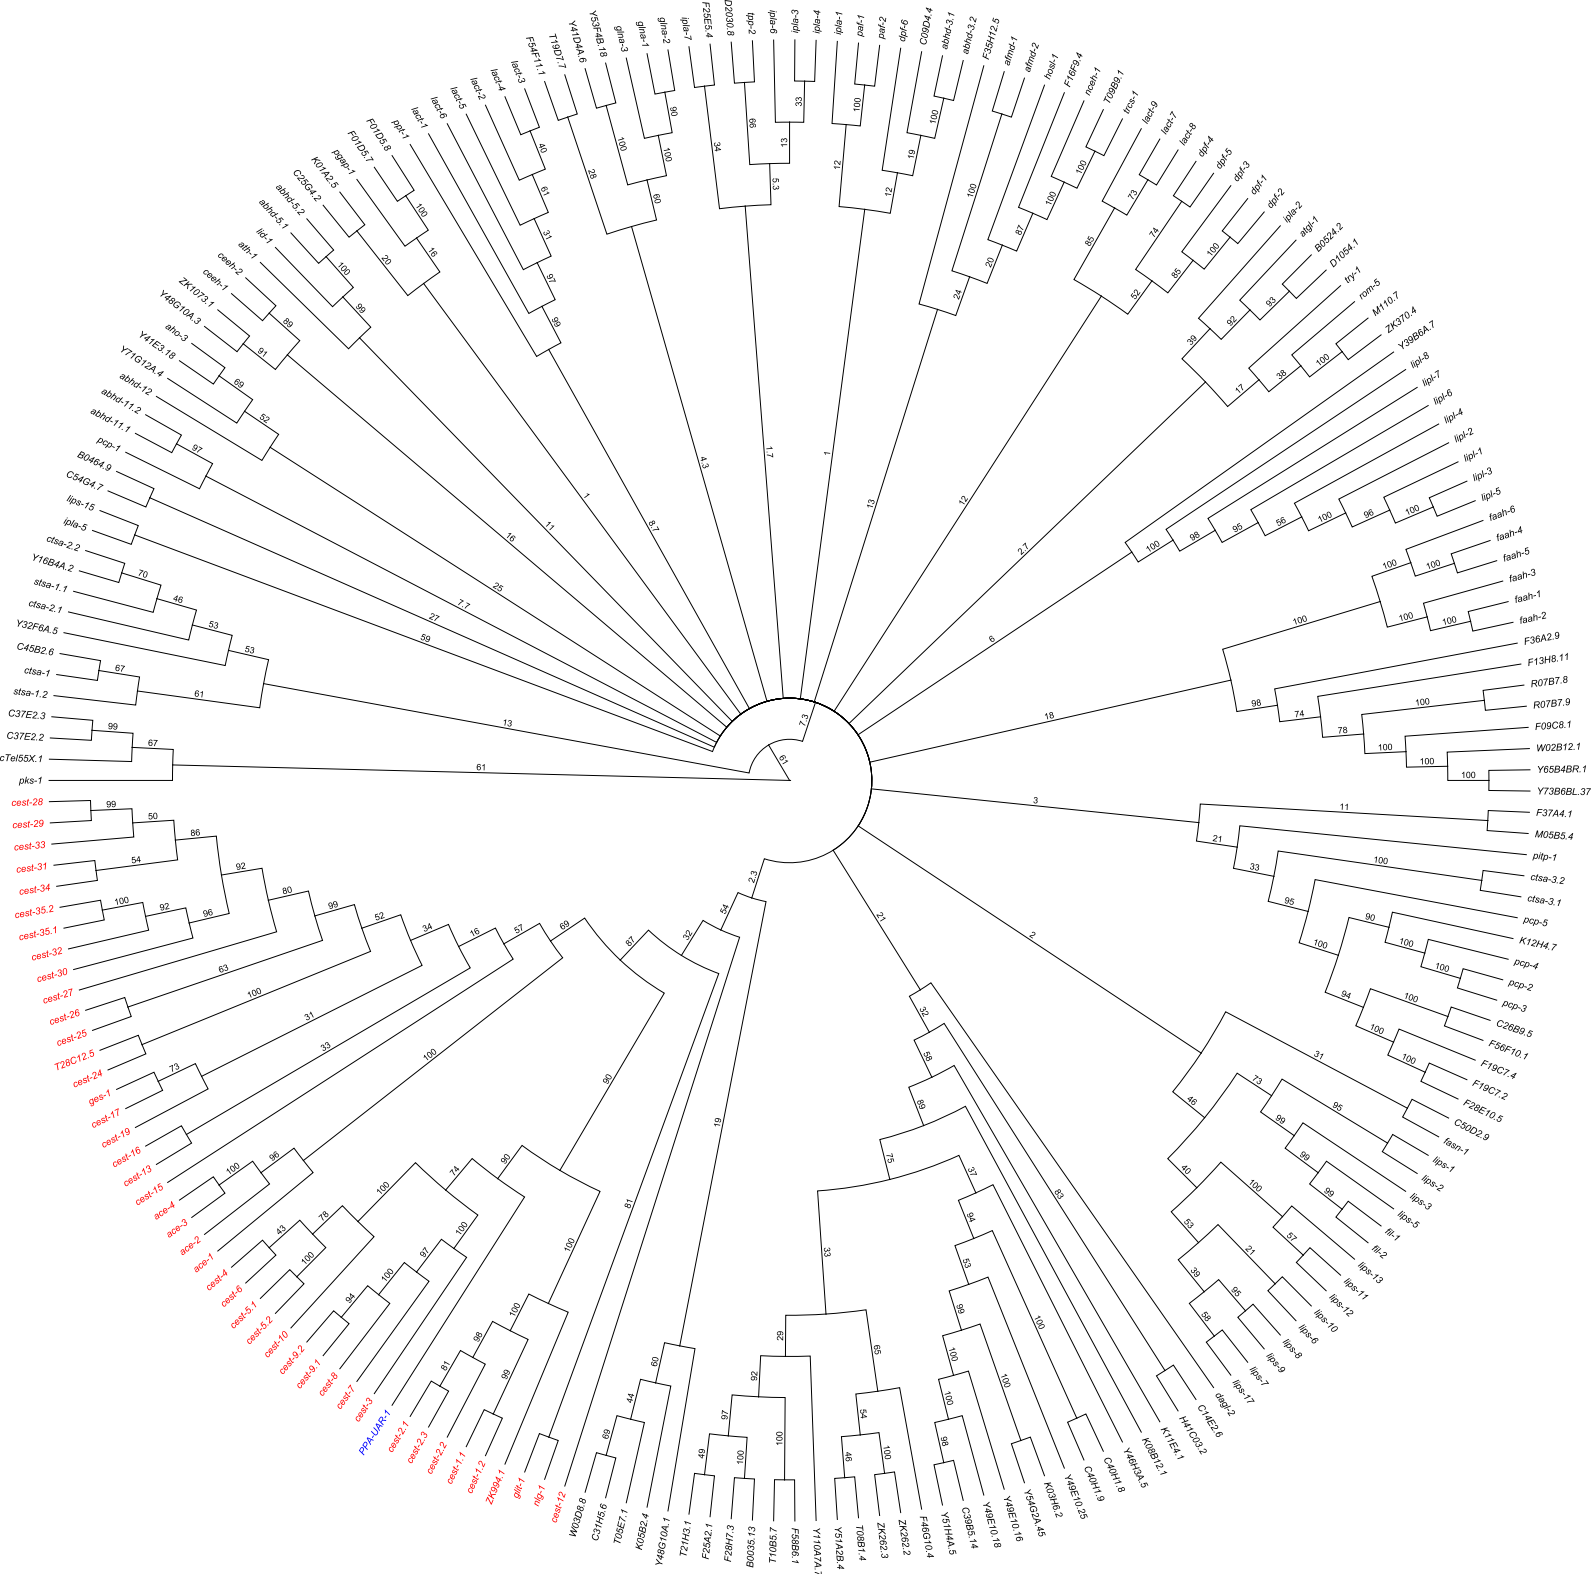

Supplement: supp [file elife-61886-supp-v1.zip]

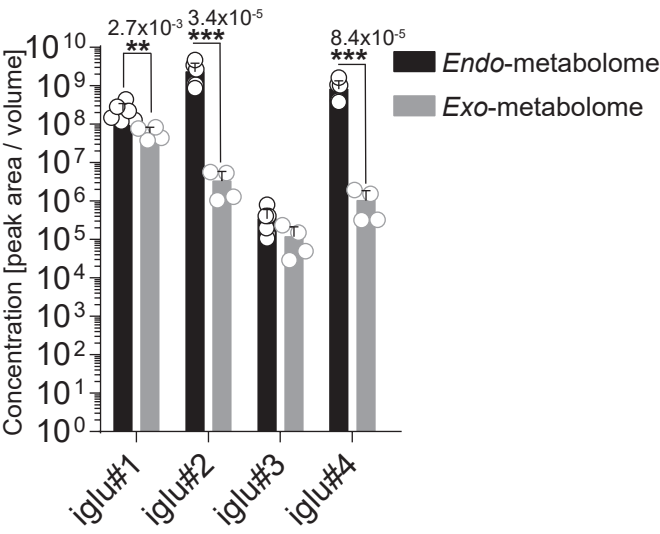

Supplement: supp [file elife-61886-supp-v1.zip]

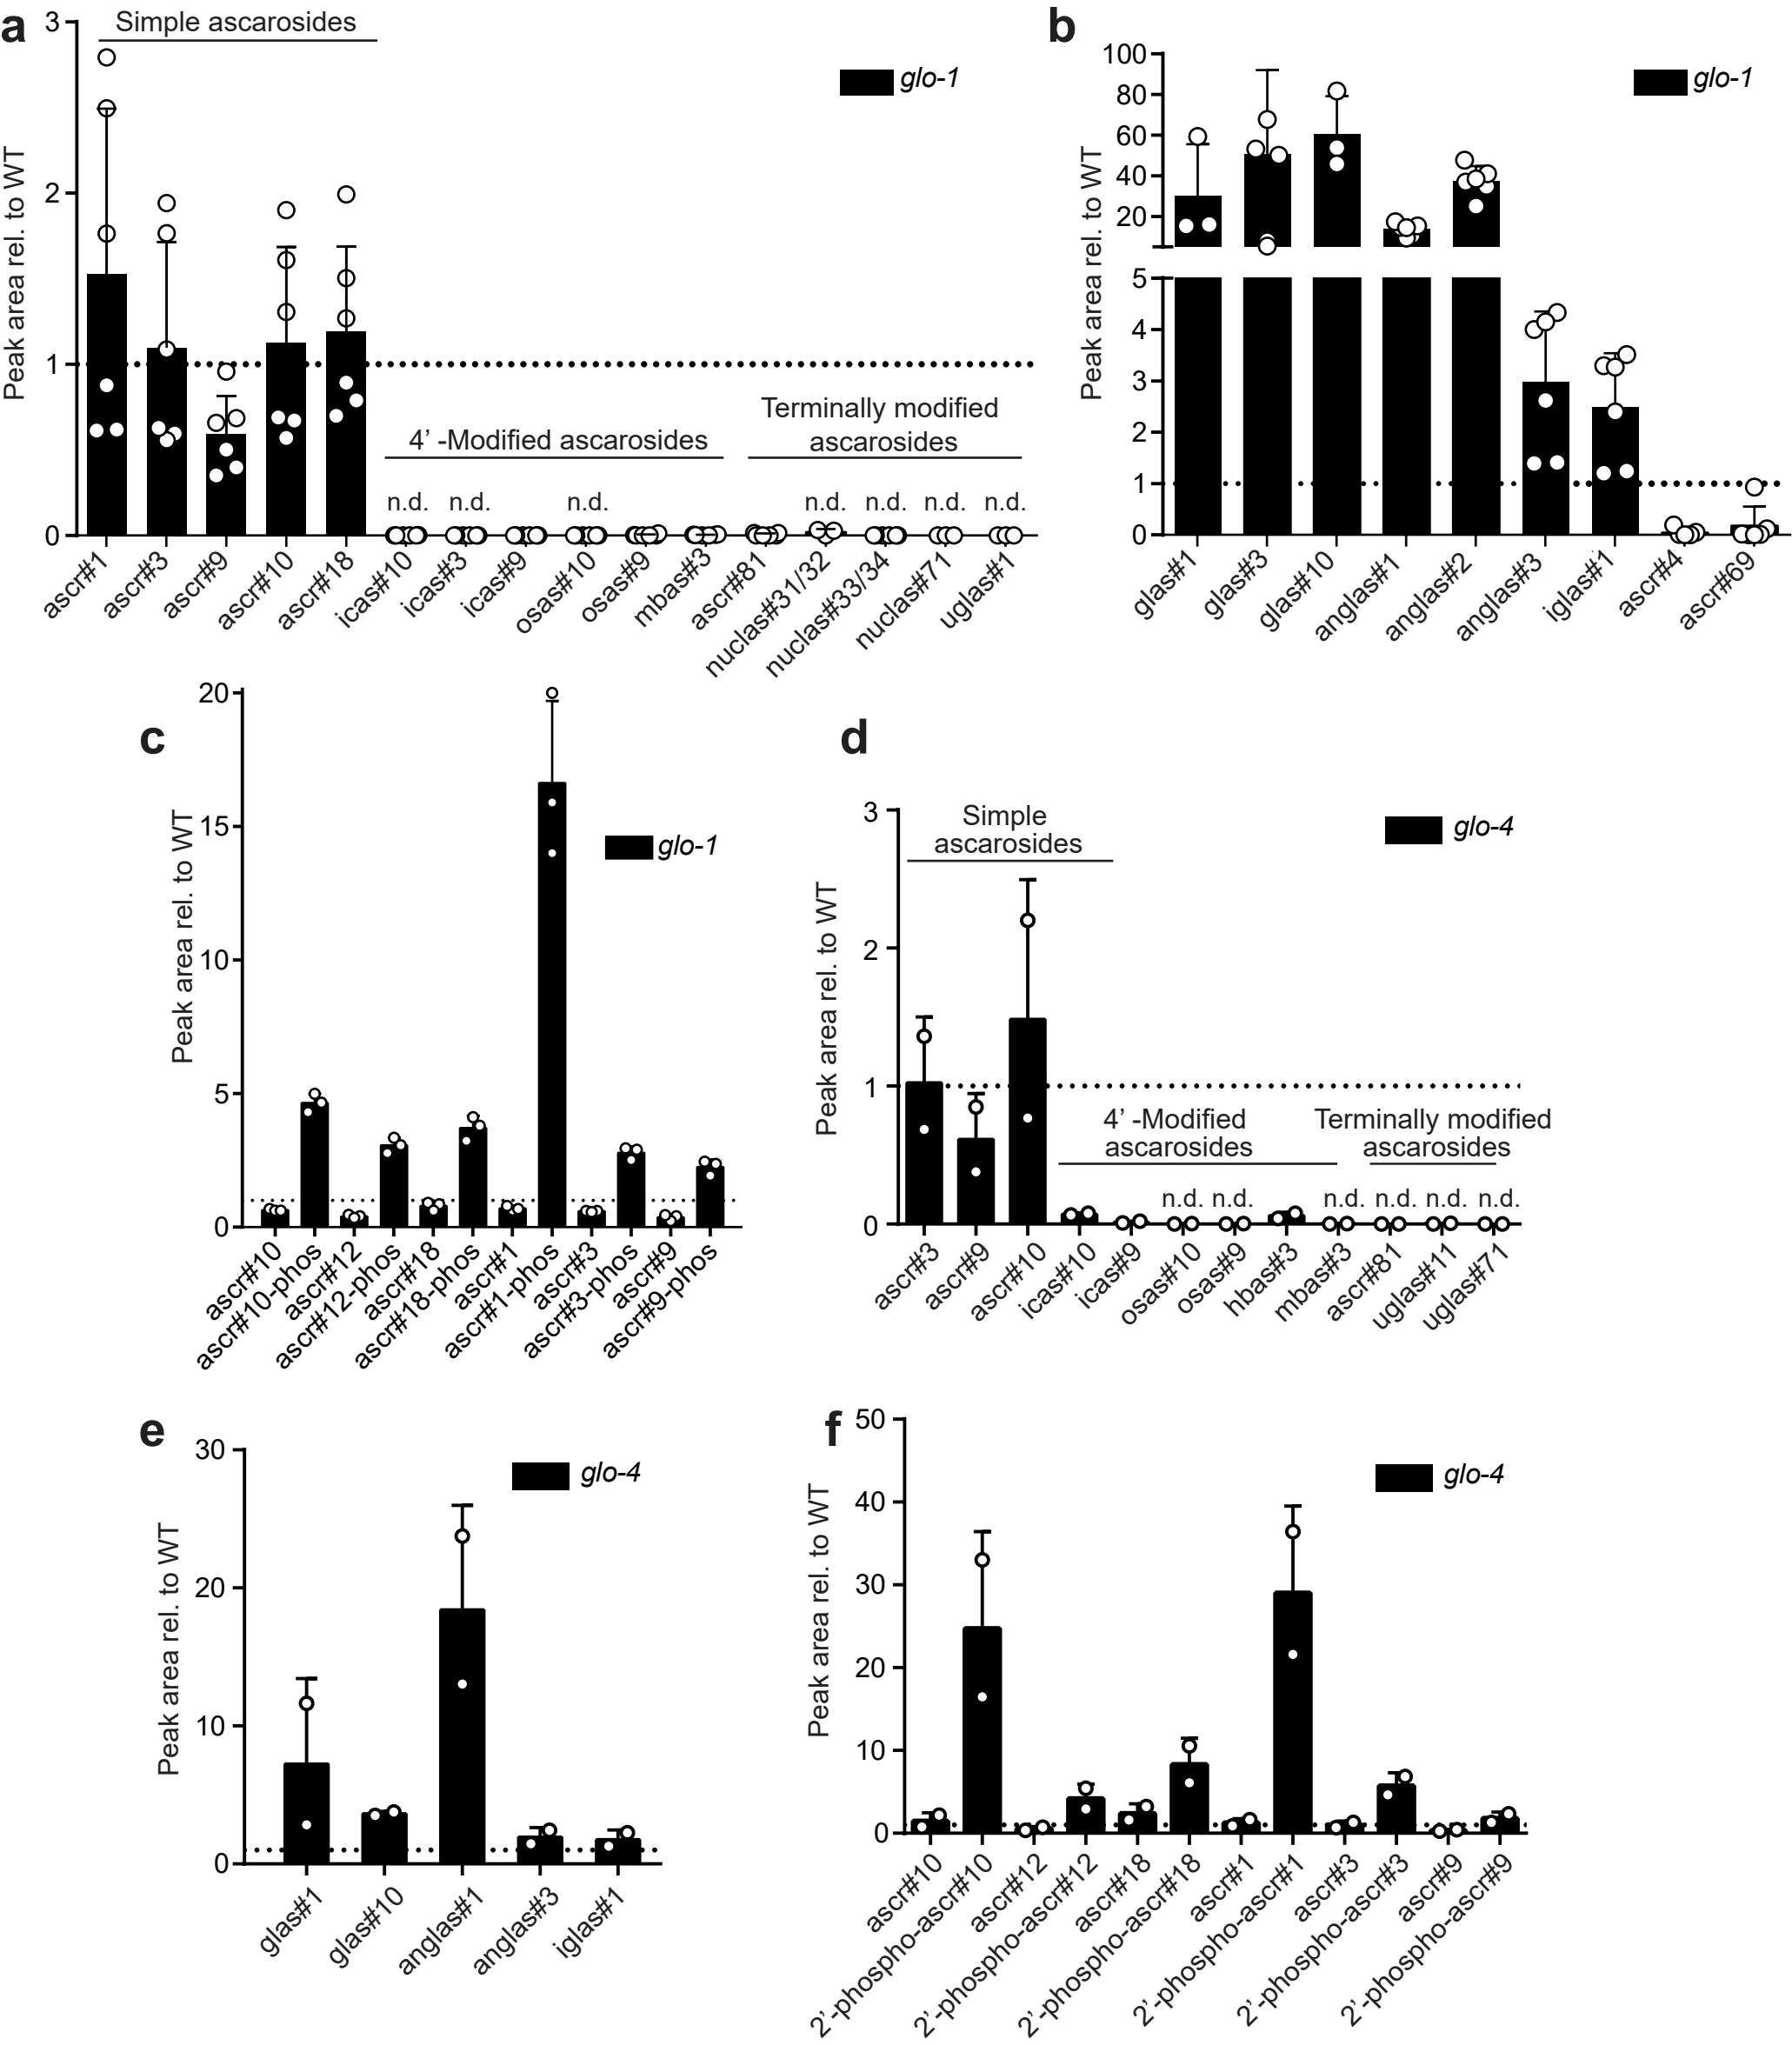

Supplement: supp [file elife-61886-supp-v1.zip]

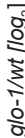

Supplement: supp [file elife-61886-supp-v1.zip]

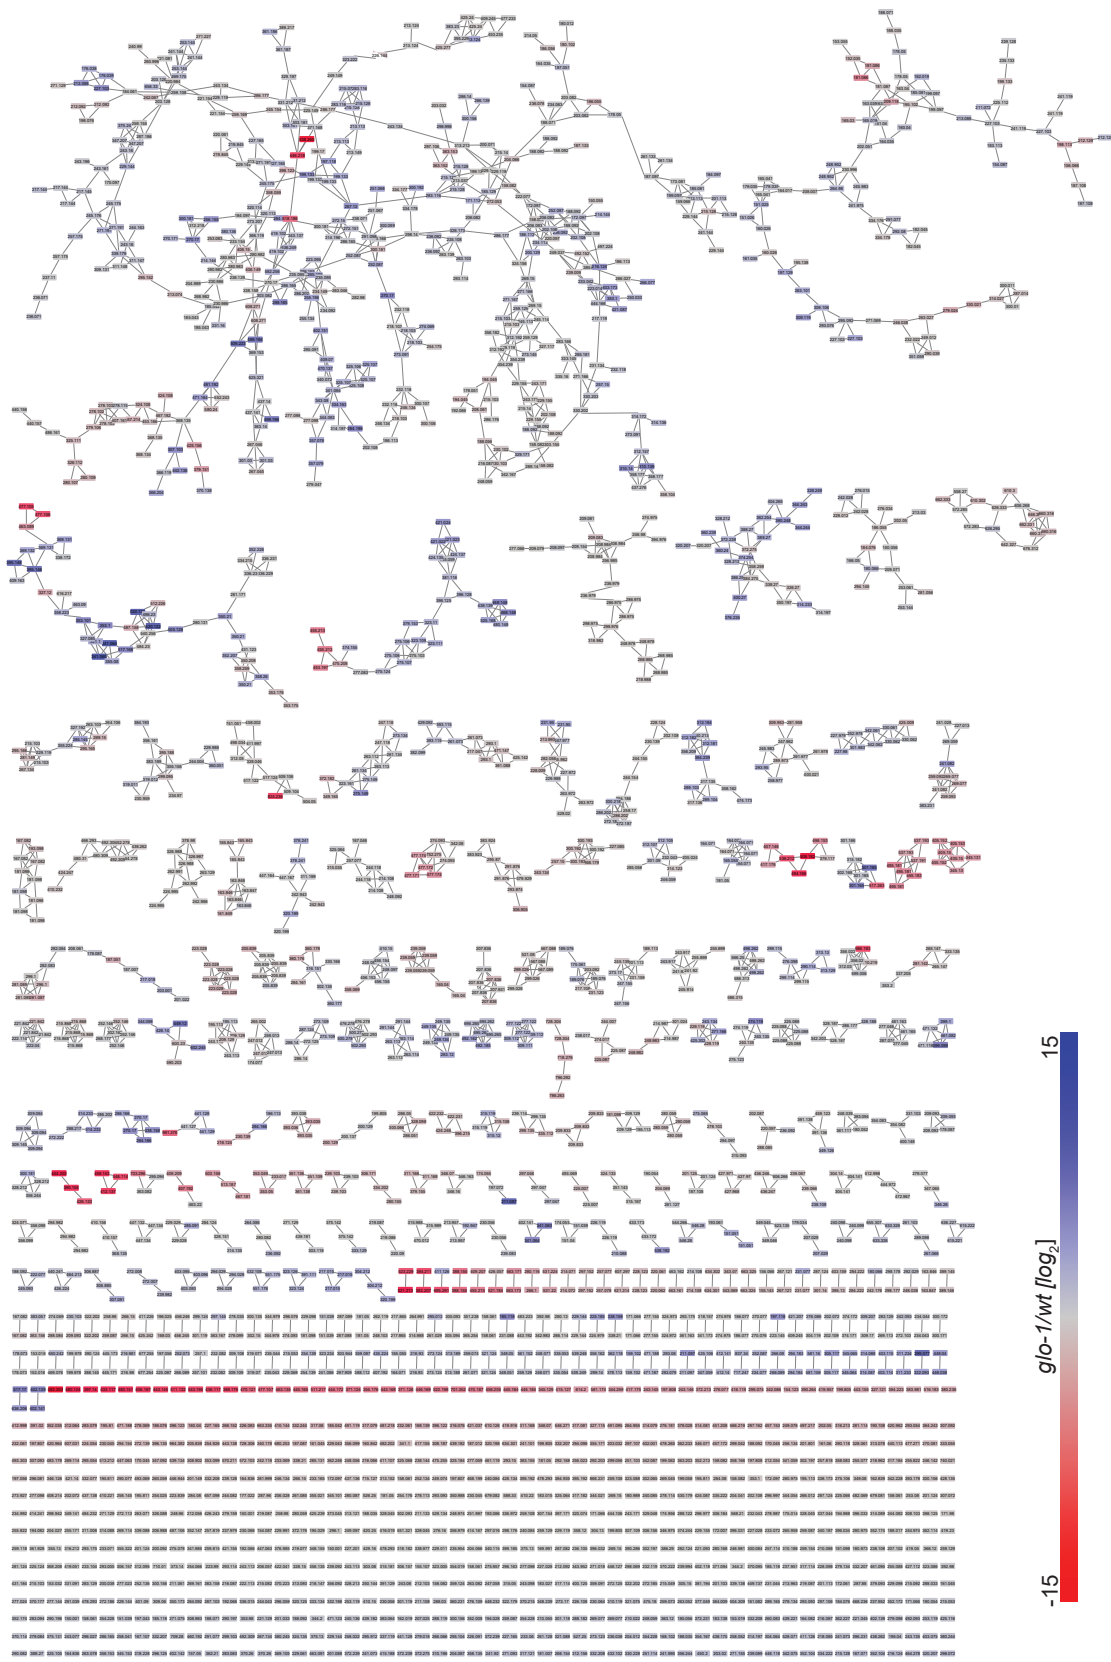

Supplement: supp [file elife-61886-supp-v1.zip]

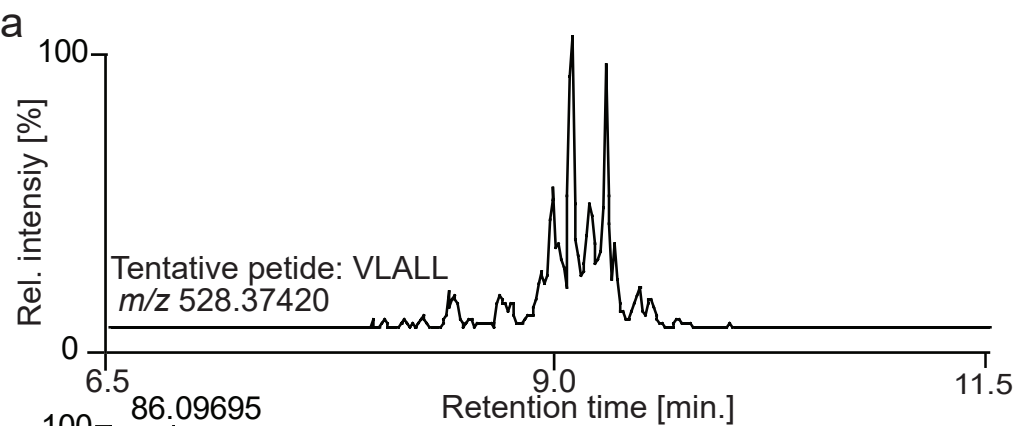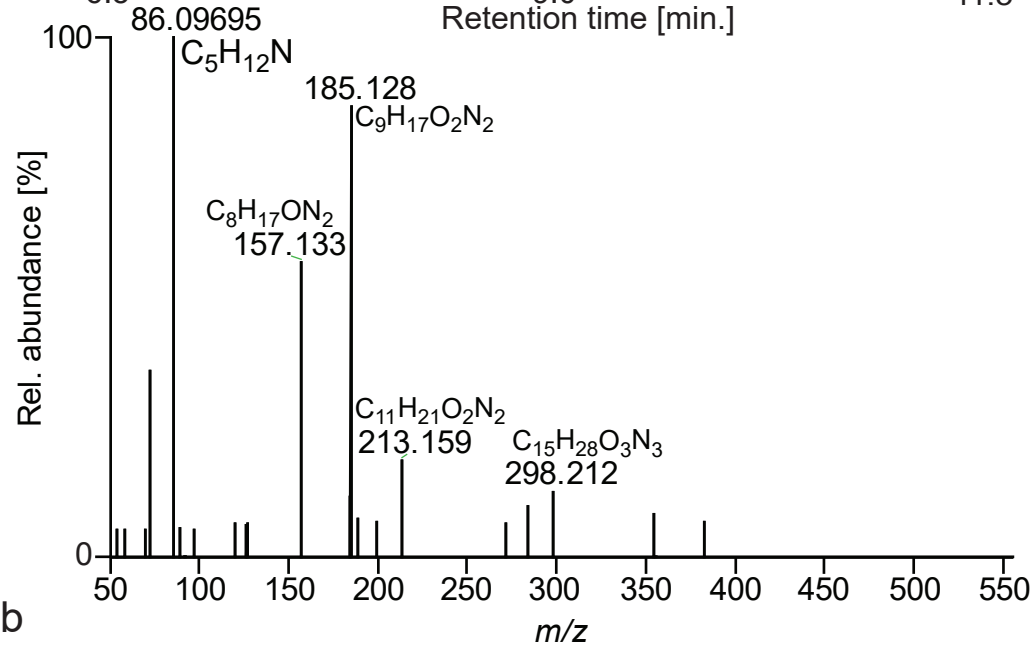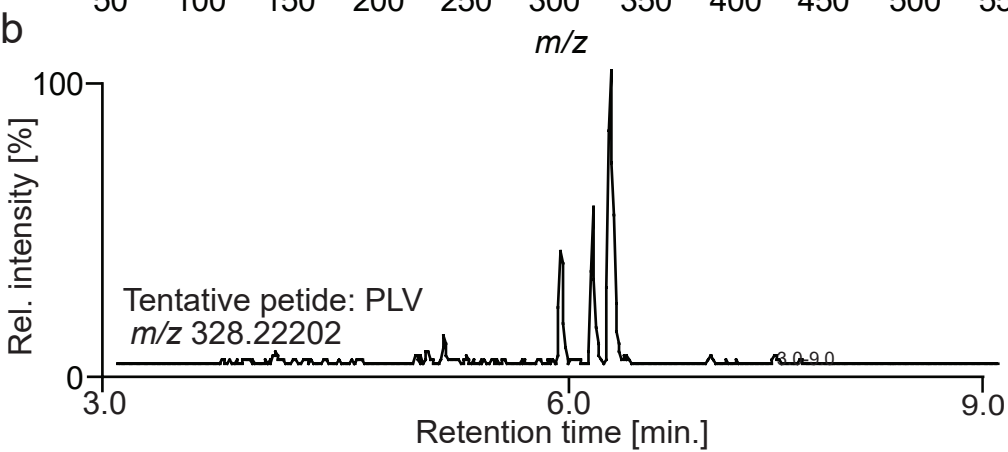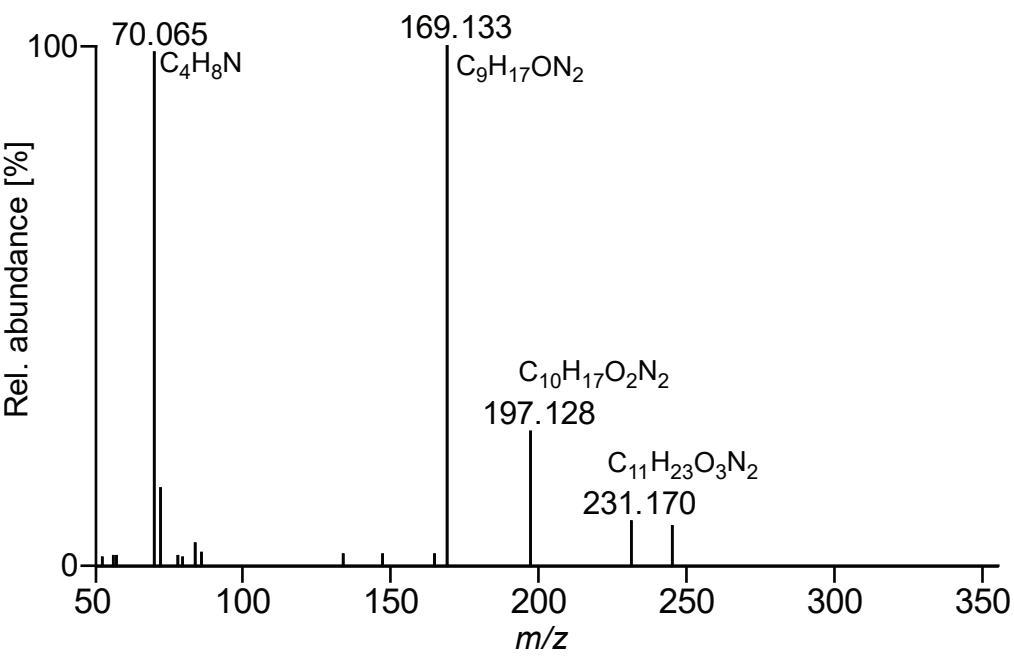

Supplement: supp [file elife-61886-supp-v1.zip]

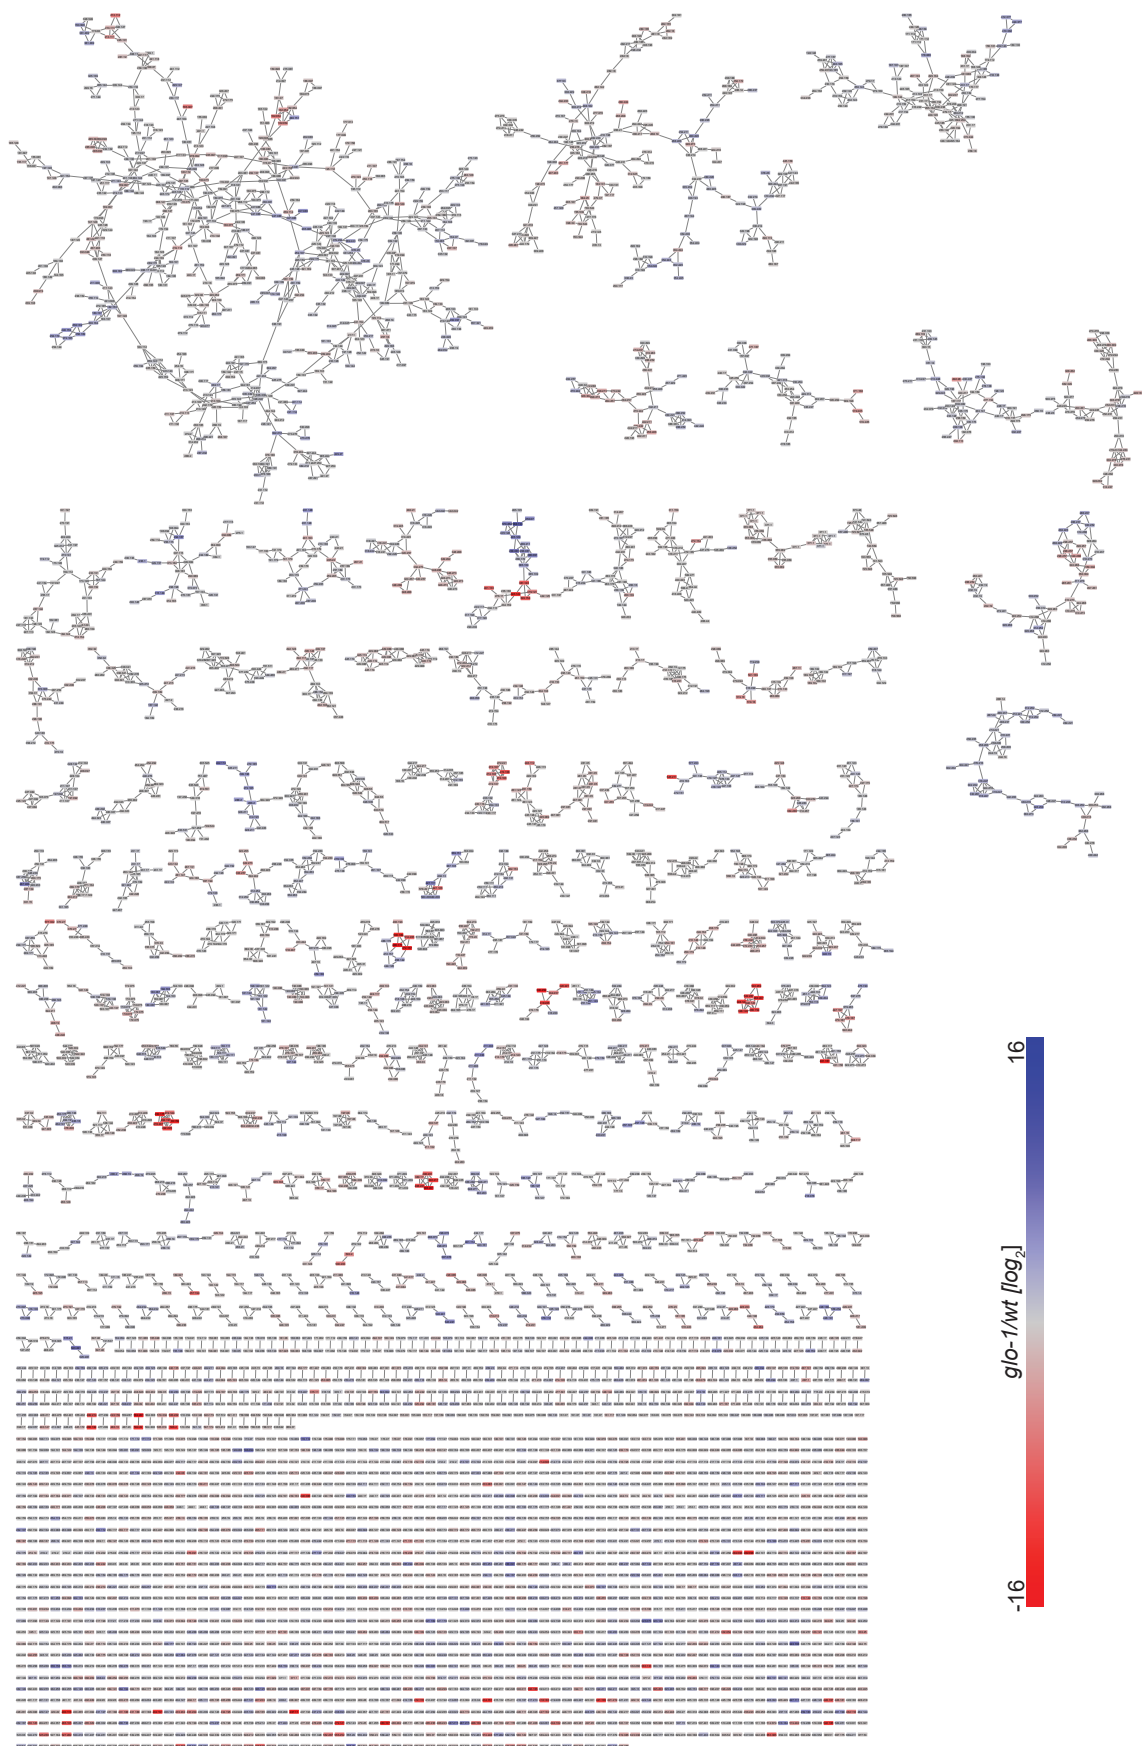

16  
-16  
 $glo-1/wt [\log_2]$

Supplement: supp [file elife-61886-supp-v1.zip]
